# Supplementary material
Source: Research Square preprint supplement (doi:10.21203/rs.3.rs-9060848/v1)
Supplement: Supplementary file 1 [file 0d7259ce91b62147ec871f27.xlsx]

## Sheet: Table S7
Metric	Value
Viral_correlation	0.746147322957402
Nonviral_correlation	0.7165659818843518
Fisher_z_difference	0.7257438549139597
Correlation_difference_pvalue	0.46799581166710613
Viral_sample_size	236.0
Nonviral_sample_size	297.0
