# Supplementary material
Source: Research Square preprint supplement (doi:10.21203/rs.3.rs-9060848/v1)
Supplement: Supplementary file 2 [file 13e542bd97727d474557524a.xlsx]

## Sheet: Table S10
covariate	coef	exp(coef)	se(coef)	coef lower 95%	coef upper 95%	exp(coef) lower 95%	exp(coef) upper 95%	cmp to	z	p	#REF!
ICOS_expression	-0.004742546742811096	0.9952686813750221	0.029500654101411575	-0.06256276630195161	0.05307767281632942	0.9393541011799391	1.0545115488203178	0.0	-0.16076073183015185	0.8722818543442524	0.19713371658023568
Stage_numeric	0.1814976610076501	1.1990117322271647	0.06948027525581287	0.0453188238703274	0.3176764981449728	1.046361411728799	1.3739317198664032	0.0	2.612218508625808	0.008995673820980422	6.796552934060512
