# Supplementary material
Source: Research Square preprint supplement (doi:10.21203/rs.3.rs-9060848/v1)
Supplement: Supplementary file 3 [file 29e610d0f8495d435c3edd1d.xlsx]

## Sheet: Table S12
Comparison	Correlation_or_z	p_value
ICOS_vs_Treg	0.5056708590909682	1.226134503547271e-112
ICOS_vs_CD8	0.5030120104539589	2.7324657164644757e-111
ICOS_vs_Treg_CD8_ratio	-0.02298694480127354	0.34000593130452916
Treg_vs_CD8_correlation_difference	0.10463258828149495	0.9166673549200879
