# Supplementary material
Source: Research Square preprint supplement (doi:10.21203/rs.3.rs-9060848/v1)
Supplement: Supplementary file 4 [file 41ab240b7819ebccff2d11ee.xlsx]

## Sheet: Table S2
Gene	Group_1	Group_2	U_statistic	P_value	Median_1	Median_2	N_1	N_2	FDR
ICOS	Tumor	Adjacent	670.0	0.3418709281643528	22.13992853	23.64001236	53	29	0.3594940113585897
ICOS	Tumor	NASH	2372.0	0.04475082795767408	22.13992853	19.806047275	53	74	0.08950165591534816
ICOS	Adjacent	NASH	1466.0	0.004001381731271973	23.64001236	19.806047275	29	74	0.01600552692508789
ICOS	Tumor	Cirrhosis	168.0	0.3594940113585897	22.13992853	24.217781125000002	53	8	0.3594940113585897
