# Supplementary material
Source: Research Square preprint supplement (doi:10.21203/rs.3.rs-9060848/v1)
Supplement: Supplementary file 6 [file 7407013700d064ffeaa6d2e5.xlsx]

## Sheet: Table S3
Name,Term,ES,NES,NOM p-val,FDR q-val,FWER p-val,Tag %,Gene %,Lead_genes
prerank,TNF-alpha Signaling via NF-kB,0.6620857680770489,1.6158813305370114,0.021660649819494584,0.7223362831858408,0.384,47/195,6.88%,CXCL2	BHLHE40	CEBPD	TRIB1	JUNB	GADD45B	SIK1	SDC4	MYC	IL6ST	CEBPB	EIF1	CCND1	FOSB	TNFRSF9	DUSP4	CCL2	SERPINE1	SQSTM1	IER2	JUN	SOD2	PFKFB3	ZBTB10	TNFAIP3	CCL20	ZC3H12A	NAMPT	PLAUR	IL23A	MSC	KLF4	SPSB1	TGIF1	BIRC3	NFIL3	CXCL10	CCRL2	PHLDA1	TANK	IL15RA	ETS2	NR4A3	ATF3	ICAM1	NFKBIE	NR4A2
prerank,Reactive Oxygen Species Pathway,0.6714143251538544,1.5223305642150076,0.11875,0.6174159292035398,0.567,12/45,4.07%,MGST1	FTL	JUNB	TXNRD1	PDLIM1	NQO1	SOD2	PRDX1	PRDX4	GLRX	PRDX6	SOD1
prerank,UV Response Up,0.6279993045191018,1.517991805277345,0.04744525547445255,0.4192330383480827,0.572,14/149,2.44%,CXCL2	TMBIM6	GGH	JUNB	C4BPB	IL6ST	CEBPG	FOSB	GRINA	ALAS1	ONECUT1	CA2	SQSTM1	SOD2
prerank,Xenobiotic Metabolism,0.5244899785673007,1.332374134298612,0.152,0.7330973451327434,0.839,34/194,2.35%,CRP	TMBIM6	ARG1	SLC22A1	CYP2E1	MT2A	ADH1C	CES1	G6PC	CYP27A1	FBP1	IGFBP1	ITIH1	AKR1C2	CYB5A	CYP2C18	AOX1	NQO1	TTPA	ANGPTL3	NDRG2	PLG	CYFIP2	ALAS1	ALDH2	CA2	ABCC3	SERPINE1	GSTO1	SSR3	CNDP2	UGDH	PC	LEAP2
prerank,Hypoxia,0.5437845793522018,1.3142140854040993,0.1553030303030303,0.6257557522123894,0.859,39/189,5.19%,BHLHE40	MT2A	PRDX5	FBP1	ALDOB	SDC2	IGFBP1	ENO1	HSPA5	TGM2	CP	SDC4	GRHPR	SIAH2	TPI1	TMEM45A	SLC25A1	PLIN2	MIF	PKLR	MT1E	SERPINE1	STC1	GAPDH	JUN	PFKFB3	PLAC8	TNFAIP3	SAP30	PLAUR	EXT1	GLRX	DDIT4	PDK1	ISG20	PFKL	XPNPEP1	NFIL3	INHA
prerank,Glycolysis,0.4861958820285832,1.2032580966173778,0.24723247232472326,0.7501356932153392,0.935,28/195,5.33%,ELF3	ALDOB	SDC2	GOT1	TSTA3	ENO1	CYB5A	HSPA5	PLOD2	SDC1	TPI1	ME2	HAX1	MIF	AGRN	STC1	PC	MERTK	SAP30	EXT1	GLRX	PLOD1	SOD1	DDIT4	FKBP4	ISG20	AK3	SDHC
prerank,Apical Surface,0.5210133686840093,1.1804845226511729,0.24290220820189273,0.6873628318584071,0.945,12/43,16.82%,HSPB1	ADIPOR2	SLC22A12	APP	PLAUR	RHCG	IL2RG	SLC2A4	SULF2	RTN4RL1	CX3CL1	MDGA1
prerank,IL-2/STAT5 Signaling,0.4497285427759842,1.1182374217159272,0.3175182481751825,0.7265398230088496,0.976,14/193,2.04%,IFITM3	SPP1	BHLHE40	GADD45B	TGM2	MYC	IRF6	IL1R2	TNFRSF9	PLIN2	CA2	PLEC	PTRH2	GSTO1
prerank,Interferon Gamma Response,0.4556383206599033,1.1120091107630465,0.32653061224489793,0.6589655850540806,0.977,17/189,3.69%,IFITM3	MT2A	MYD88	PSMB2	CXCL9	CD38	CCL2	ITGB7	ISG15	SOD2	UBE2L6	TRIM26	TNFAIP3	IRF9	NAMPT	IRF8	PTPN6
prerank,Interferon Alpha Response,0.4678550881139565,1.0698765098444498,0.33116883116883117,0.67350796460177,0.99,1/91,0.01%,IFITM3
