# Supplementary material
Source: Research Square preprint supplement (doi:10.21203/rs.3.rs-9060848/v1)
Supplement: Supplementary file 7 [file 7cb0faebb4faf2d8e9f9ff13.xlsx]

## Sheet: Table S8
Stage	Spearman_rho	p_value	Sample_size
1.0	0.7011886241807208	2.2027077191689403e-49	325
2.0	0.6484305211222589	6.803831088282071e-22	172
3.0	0.740224421882602	4.045373566712952e-31	172
