# Supplementary material
Source: Research Square preprint supplement (doi:10.21203/rs.3.rs-9060848/v1)
Supplement: Supplementary file 8 [file 7eba1cd8d4ba273307aa0ca5.xlsx]

## Sheet: Table S13
ICOS_expression	Exhaustion_score	Treg_score	CD8_score	OS.time	OS	Immune_Cluster
1.3011	3.79892	2.682066666666667	4.893000000000001	0.0	0	0
4.8064	5.71526	4.836366666666667	5.9709	0.0	0	1
3.8421	5.377039999999999	4.105099999999999	5.5310500000000005	0.0	0	0
6.4915	8.0365	5.914433333333332	8.958	0.0	0	1
4.7842	7.38752	5.3581	7.571400000000001	0.0	0	1
4.575	6.410520000000001	4.1219	6.819599999999999	1.0	0	1
3.4757	5.42328	5.007633333333334	5.8614999999999995	6.0	0	1
2.4249	5.21096	3.189033333333333	5.3478	6.0	0	0
0.6326	2.92564	1.208	3.5936500000000002	6.0	0	0
1.904	3.80938	3.8580666666666663	4.0966000000000005	8.0	0	0
3.592	4.75844	4.358733333333333	4.1311	9.0	0	0
4.905	6.8557999999999995	6.044333333333333	4.9878	9.0	0	1
6.8687	8.7509	7.4065666666666665	9.14265	9.0	1	1
0.7168	2.97694	2.0793333333333335	2.3379	10.0	0	0
0.0	2.98318	3.151566666666666	3.3249	11.0	1	0
0.0	2.98318	3.151566666666666	5.89215	11.0	1	0
0.0	2.98318	4.7626333333333335	3.3249	11.0	1	0
0.0	2.98318	4.7626333333333335	5.89215	11.0	1	0
0.0	2.98318	3.151566666666666	3.3249	11.0	1	0
0.0	2.98318	3.151566666666666	5.89215	11.0	1	0
0.0	2.98318	4.7626333333333335	3.3249	11.0	1	0
0.0	2.98318	4.7626333333333335	5.89215	11.0	1	0
0.0	5.09378	3.151566666666666	3.3249	11.0	1	0
0.0	5.09378	3.151566666666666	5.89215	11.0	1	0
0.0	5.09378	4.7626333333333335	3.3249	11.0	1	0
0.0	5.09378	4.7626333333333335	5.89215	11.0	1	0
0.0	5.09378	3.151566666666666	3.3249	11.0	1	0
0.0	5.09378	3.151566666666666	5.89215	11.0	1	0
0.0	5.09378	4.7626333333333335	3.3249	11.0	1	0
0.0	5.09378	4.7626333333333335	5.89215	11.0	1	0
0.0	2.98318	3.151566666666666	3.3249	11.0	1	0
0.0	2.98318	3.151566666666666	5.89215	11.0	1	0
0.0	2.98318	4.7626333333333335	3.3249	11.0	1	0
0.0	2.98318	4.7626333333333335	5.89215	11.0	1	0
0.0	2.98318	3.151566666666666	3.3249	11.0	1	0
0.0	2.98318	3.151566666666666	5.89215	11.0	1	0
0.0	2.98318	4.7626333333333335	3.3249	11.0	1	0
0.0	2.98318	4.7626333333333335	5.89215	11.0	1	0
0.0	5.09378	3.151566666666666	3.3249	11.0	1	0
0.0	5.09378	3.151566666666666	5.89215	11.0	1	0
0.0	5.09378	4.7626333333333335	3.3249	11.0	1	0
0.0	5.09378	4.7626333333333335	5.89215	11.0	1	0
0.0	5.09378	3.151566666666666	3.3249	11.0	1	0
0.0	5.09378	3.151566666666666	5.89215	11.0	1	0
0.0	5.09378	4.7626333333333335	3.3249	11.0	1	0
0.0	5.09378	4.7626333333333335	5.89215	11.0	1	0
3.3551	4.86738	3.8273666666666664	4.54485	12.0	1	0
6.7415	8.62924	6.474166666666666	10.0157	12.0	0	1
2.6549	5.18872	3.8496666666666672	6.02825	14.0	1	0
2.6549	5.18872	3.8496666666666672	3.1497	14.0	1	0
2.6549	5.18872	3.580033333333333	6.02825	14.0	1	0
2.6549	5.18872	3.580033333333333	3.1497	14.0	1	0
2.6549	5.18872	3.8496666666666672	6.02825	14.0	1	0
2.6549	5.18872	3.8496666666666672	3.1497	14.0	1	0
2.6549	5.18872	3.580033333333333	6.02825	14.0	1	0
2.6549	5.18872	3.580033333333333	3.1497	14.0	1	0
2.6549	3.3410400000000005	3.8496666666666672	6.02825	14.0	1	0
2.6549	3.3410400000000005	3.8496666666666672	3.1497	14.0	1	0
2.6549	3.3410400000000005	3.580033333333333	6.02825	14.0	1	0
2.6549	3.3410400000000005	3.580033333333333	3.1497	14.0	1	0
2.6549	3.3410400000000005	3.8496666666666672	6.02825	14.0	1	0
2.6549	3.3410400000000005	3.8496666666666672	3.1497	14.0	1	0
2.6549	3.3410400000000005	3.580033333333333	6.02825	14.0	1	0
2.6549	3.3410400000000005	3.580033333333333	3.1497	14.0	1	0
2.6549	5.18872	3.8496666666666672	6.02825	14.0	1	0
2.6549	5.18872	3.8496666666666672	3.1497	14.0	1	0
2.6549	5.18872	3.580033333333333	6.02825	14.0	1	0
2.6549	5.18872	3.580033333333333	3.1497	14.0	1	0
2.6549	5.18872	3.8496666666666672	6.02825	14.0	1	0
2.6549	5.18872	3.8496666666666672	3.1497	14.0	1	0
2.6549	5.18872	3.580033333333333	6.02825	14.0	1	0
2.6549	5.18872	3.580033333333333	3.1497	14.0	1	0
2.6549	3.3410400000000005	3.8496666666666672	6.02825	14.0	1	0
2.6549	3.3410400000000005	3.8496666666666672	3.1497	14.0	1	0
2.6549	3.3410400000000005	3.580033333333333	6.02825	14.0	1	0
2.6549	3.3410400000000005	3.580033333333333	3.1497	14.0	1	0
2.6549	3.3410400000000005	3.8496666666666672	6.02825	14.0	1	0
2.6549	3.3410400000000005	3.8496666666666672	3.1497	14.0	1	0
2.6549	3.3410400000000005	3.580033333333333	6.02825	14.0	1	0
2.6549	3.3410400000000005	3.580033333333333	3.1497	14.0	1	0
2.8488	4.39058	3.6237666666666666	4.3021	15.0	0	0
2.3193	4.12258	3.5514999999999994	3.5409	16.0	1	0
3.999	4.51674	3.522766666666667	4.941549999999999	19.0	1	0
4.1802	5.41992	5.0639666666666665	5.33655	20.0	0	1
6.1094	8.071340000000001	6.804633333333332	8.0491	20.0	0	1
1.3959	2.44504	3.2763333333333335	1.40185	22.0	0	0
1.1345	3.3386400000000003	3.089266666666667	1.7986	27.0	1	0
2.4132	5.76668	5.573566666666667	4.9178	31.0	1	0
0.5174	2.7398000000000002	2.4116666666666666	1.76205	34.0	1	0
0.5174	2.7398000000000002	2.4116666666666666	6.1146	34.0	1	0
0.5174	2.7398000000000002	2.2455333333333334	1.76205	34.0	1	0
0.5174	2.7398000000000002	2.2455333333333334	6.1146	34.0	1	0
0.5174	2.7398000000000002	2.4116666666666666	1.76205	34.0	1	0
0.5174	2.7398000000000002	2.4116666666666666	6.1146	34.0	1	0
0.5174	2.7398000000000002	2.2455333333333334	1.76205	34.0	1	0
0.5174	2.7398000000000002	2.2455333333333334	6.1146	34.0	1	0
0.5174	5.21798	2.4116666666666666	1.76205	34.0	1	0
0.5174	5.21798	2.4116666666666666	6.1146	34.0	1	0
0.5174	5.21798	2.2455333333333334	1.76205	34.0	1	0
0.5174	5.21798	2.2455333333333334	6.1146	34.0	1	0
0.5174	5.21798	2.4116666666666666	1.76205	34.0	1	0
0.5174	5.21798	2.4116666666666666	6.1146	34.0	1	0
0.5174	5.21798	2.2455333333333334	1.76205	34.0	1	0
0.5174	5.21798	2.2455333333333334	6.1146	34.0	1	0
0.5174	2.7398000000000002	2.4116666666666666	1.76205	34.0	1	0
0.5174	2.7398000000000002	2.4116666666666666	6.1146	34.0	1	0
0.5174	2.7398000000000002	2.2455333333333334	1.76205	34.0	1	0
0.5174	2.7398000000000002	2.2455333333333334	6.1146	34.0	1	0
0.5174	2.7398000000000002	2.4116666666666666	1.76205	34.0	1	0
0.5174	2.7398000000000002	2.4116666666666666	6.1146	34.0	1	0
0.5174	2.7398000000000002	2.2455333333333334	1.76205	34.0	1	0
0.5174	2.7398000000000002	2.2455333333333334	6.1146	34.0	1	0
0.5174	5.21798	2.4116666666666666	1.76205	34.0	1	0
0.5174	5.21798	2.4116666666666666	6.1146	34.0	1	0
0.5174	5.21798	2.2455333333333334	1.76205	34.0	1	0
0.5174	5.21798	2.2455333333333334	6.1146	34.0	1	0
0.5174	5.21798	2.4116666666666666	1.76205	34.0	1	0
0.5174	5.21798	2.4116666666666666	6.1146	34.0	1	0
0.5174	5.21798	2.2455333333333334	1.76205	34.0	1	0
0.5174	5.21798	2.2455333333333334	6.1146	34.0	1	0
2.9198	3.6974000000000005	3.5089333333333332	2.29645	36.0	1	0
1.0801	1.6643000000000001	1.6265999999999998	3.0688500000000003	44.0	0	0
2.2646	5.12912	5.105366666666666	6.024850000000001	46.0	1	0
4.7187	5.7746	5.036866666666667	4.66485	52.0	1	1
3.9647	5.543820000000001	5.473033333333333	5.0776	56.0	1	1
3.2073	5.669919999999999	4.196466666666666	7.4477	56.0	1	1
2.553	4.62408	4.319	4.70595	65.0	1	0
3.8609	5.164540000000001	4.3876	7.951599999999999	65.0	1	1
2.6852	5.16988	4.2281	4.5271	67.0	1	0
0.6061	2.61604	1.8567	2.9993	79.0	0	0
0.6061	2.61604	1.8567	6.44265	79.0	0	0
0.6061	2.61604	3.9472666666666663	2.9993	79.0	0	0
0.6061	2.61604	3.9472666666666663	6.44265	79.0	0	0
0.6061	2.61604	1.8567	2.9993	79.0	0	0
0.6061	2.61604	1.8567	6.44265	79.0	0	0
0.6061	2.61604	3.9472666666666663	2.9993	79.0	0	0
0.6061	2.61604	3.9472666666666663	6.44265	79.0	0	0
0.6061	5.817359999999999	1.8567	2.9993	79.0	0	0
0.6061	5.817359999999999	1.8567	6.44265	79.0	0	0
0.6061	5.817359999999999	3.9472666666666663	2.9993	79.0	0	0
0.6061	5.817359999999999	3.9472666666666663	6.44265	79.0	0	0
0.6061	5.817359999999999	1.8567	2.9993	79.0	0	0
0.6061	5.817359999999999	1.8567	6.44265	79.0	0	0
0.6061	5.817359999999999	3.9472666666666663	2.9993	79.0	0	0
0.6061	5.817359999999999	3.9472666666666663	6.44265	79.0	0	0
0.6061	2.61604	1.8567	2.9993	79.0	0	0
0.6061	2.61604	1.8567	6.44265	79.0	0	0
0.6061	2.61604	3.9472666666666663	2.9993	79.0	0	0
0.6061	2.61604	3.9472666666666663	6.44265	79.0	0	0
0.6061	2.61604	1.8567	2.9993	79.0	0	0
0.6061	2.61604	1.8567	6.44265	79.0	0	0
0.6061	2.61604	3.9472666666666663	2.9993	79.0	0	0
0.6061	2.61604	3.9472666666666663	6.44265	79.0	0	0
0.6061	5.817359999999999	1.8567	2.9993	79.0	0	0
0.6061	5.817359999999999	1.8567	6.44265	79.0	0	0
0.6061	5.817359999999999	3.9472666666666663	2.9993	79.0	0	0
0.6061	5.817359999999999	3.9472666666666663	6.44265	79.0	0	0
0.6061	5.817359999999999	1.8567	2.9993	79.0	0	0
0.6061	5.817359999999999	1.8567	6.44265	79.0	0	0
0.6061	5.817359999999999	3.9472666666666663	2.9993	79.0	0	0
0.6061	5.817359999999999	3.9472666666666663	6.44265	79.0	0	0
4.1845	5.49098	4.3313	6.18985	87.0	1	1
4.8655	6.372019999999999	5.793866666666666	6.30115	91.0	1	1
4.3946	5.202540000000001	4.7375	4.4228000000000005	94.0	0	0
5.4199	5.64188	4.766066666666667	6.408799999999999	97.0	1	1
6.8267	8.446360000000002	7.474899999999999	8.27615	101.0	1	1
4.6148	5.553660000000001	5.399633333333334	5.1212	102.0	1	1
4.443	5.4648	4.264966666666666	7.0113	103.0	1	1
5.1397	7.678699999999999	5.733233333333334	7.47165	107.0	1	1
4.2397	6.62886	5.0389333333333335	7.6319	115.0	1	1
3.8894	5.1953	4.3579	4.7202	129.0	1	0
5.0603	6.3528199999999995	5.433666666666667	5.15405	129.0	1	1
1.7344	3.30136	3.9430333333333336	3.4233	137.0	0	0
4.3182	5.9148000000000005	5.2054	5.3938500000000005	140.0	1	1
0.6947	2.55736	1.1437000000000002	1.36385	141.0	0	0
1.4556	4.16898	2.710566666666667	4.65215	170.0	0	0
2.6668	4.74022	3.4776333333333334	3.81365	171.0	1	0
6.2622	7.93806	6.4389666666666665	7.56445	171.0	1	1
3.3397	5.788200000000001	4.040500000000001	5.93355	180.0	0	1
3.0547	5.03486	4.137466666666667	4.6088	183.0	0	0
3.0547	5.03486	4.137466666666667	5.4692	183.0	0	0
3.0547	5.03486	3.4048000000000003	4.6088	183.0	0	0
3.0547	5.03486	3.4048000000000003	5.4692	183.0	0	0
3.0547	5.03486	4.137466666666667	4.6088	183.0	0	0
3.0547	5.03486	4.137466666666667	5.4692	183.0	0	0
3.0547	5.03486	3.4048000000000003	4.6088	183.0	0	0
3.0547	5.03486	3.4048000000000003	5.4692	183.0	0	0
3.0547	5.33854	4.137466666666667	4.6088	183.0	0	0
3.0547	5.33854	4.137466666666667	5.4692	183.0	0	0
3.0547	5.33854	3.4048000000000003	4.6088	183.0	0	0
3.0547	5.33854	3.4048000000000003	5.4692	183.0	0	0
3.0547	5.33854	4.137466666666667	4.6088	183.0	0	0
3.0547	5.33854	4.137466666666667	5.4692	183.0	0	0
3.0547	5.33854	3.4048000000000003	4.6088	183.0	0	0
3.0547	5.33854	3.4048000000000003	5.4692	183.0	0	0
3.0547	5.03486	4.137466666666667	4.6088	183.0	0	0
3.0547	5.03486	4.137466666666667	5.4692	183.0	0	0
3.0547	5.03486	3.4048000000000003	4.6088	183.0	0	0
3.0547	5.03486	3.4048000000000003	5.4692	183.0	0	0
3.0547	5.03486	4.137466666666667	4.6088	183.0	0	0
3.0547	5.03486	4.137466666666667	5.4692	183.0	0	0
3.0547	5.03486	3.4048000000000003	4.6088	183.0	0	0
3.0547	5.03486	3.4048000000000003	5.4692	183.0	0	0
3.0547	5.33854	4.137466666666667	4.6088	183.0	0	0
3.0547	5.33854	4.137466666666667	5.4692	183.0	0	0
3.0547	5.33854	3.4048000000000003	4.6088	183.0	0	0
3.0547	5.33854	3.4048000000000003	5.4692	183.0	0	0
3.0547	5.33854	4.137466666666667	4.6088	183.0	0	0
3.0547	5.33854	4.137466666666667	5.4692	183.0	0	0
3.0547	5.33854	3.4048000000000003	4.6088	183.0	0	0
3.0547	5.33854	3.4048000000000003	5.4692	183.0	0	0
2.1622	6.25816	2.9591666666666665	7.32025	194.0	1	0
2.1622	6.25816	2.9591666666666665	4.60865	194.0	1	0
2.1622	6.25816	3.0609	7.32025	194.0	1	0
2.1622	6.25816	3.0609	4.60865	194.0	1	0
2.1622	6.25816	2.9591666666666665	7.32025	194.0	1	0
2.1622	6.25816	2.9591666666666665	4.60865	194.0	1	0
2.1622	6.25816	3.0609	7.32025	194.0	1	0
2.1622	6.25816	3.0609	4.60865	194.0	1	0
2.1622	3.7020600000000004	2.9591666666666665	7.32025	194.0	1	0
2.1622	3.7020600000000004	2.9591666666666665	4.60865	194.0	1	0
2.1622	3.7020600000000004	3.0609	7.32025	194.0	1	0
2.1622	3.7020600000000004	3.0609	4.60865	194.0	1	0
2.1622	3.7020600000000004	2.9591666666666665	7.32025	194.0	1	0
2.1622	3.7020600000000004	2.9591666666666665	4.60865	194.0	1	0
2.1622	3.7020600000000004	3.0609	7.32025	194.0	1	0
2.1622	3.7020600000000004	3.0609	4.60865	194.0	1	0
2.1622	6.25816	2.9591666666666665	7.32025	194.0	1	0
2.1622	6.25816	2.9591666666666665	4.60865	194.0	1	0
2.1622	6.25816	3.0609	7.32025	194.0	1	0
2.1622	6.25816	3.0609	4.60865	194.0	1	0
2.1622	6.25816	2.9591666666666665	7.32025	194.0	1	0
2.1622	6.25816	2.9591666666666665	4.60865	194.0	1	0
2.1622	6.25816	3.0609	7.32025	194.0	1	0
2.1622	6.25816	3.0609	4.60865	194.0	1	0
2.1622	3.7020600000000004	2.9591666666666665	7.32025	194.0	1	0
2.1622	3.7020600000000004	2.9591666666666665	4.60865	194.0	1	0
2.1622	3.7020600000000004	3.0609	7.32025	194.0	1	0
2.1622	3.7020600000000004	3.0609	4.60865	194.0	1	0
2.1622	3.7020600000000004	2.9591666666666665	7.32025	194.0	1	0
2.1622	3.7020600000000004	2.9591666666666665	4.60865	194.0	1	0
2.1622	3.7020600000000004	3.0609	7.32025	194.0	1	0
2.1622	3.7020600000000004	3.0609	4.60865	194.0	1	0
2.7024	4.778499999999999	4.326899999999999	3.1141	195.0	1	0
3.5853	4.6718	3.0201	4.7224	211.0	0	0
5.7669	8.02004	5.9988	8.83225	214.0	1	1
6.104	7.967319999999999	6.866199999999999	7.88625	217.0	1	1
3.655	4.253159999999999	3.2768333333333337	4.19745	219.0	0	0
1.9288	4.87714	4.510566666666667	4.88505	223.0	1	0
1.9288	4.87714	4.510566666666667	4.5216	223.0	1	0
1.9288	4.87714	1.9600666666666668	4.88505	223.0	1	0
1.9288	4.87714	1.9600666666666668	4.5216	223.0	1	0
1.9288	4.87714	4.510566666666667	4.88505	223.0	1	0
1.9288	4.87714	4.510566666666667	4.5216	223.0	1	0
1.9288	4.87714	1.9600666666666668	4.88505	223.0	1	0
1.9288	4.87714	1.9600666666666668	4.5216	223.0	1	0
1.9288	4.03022	4.510566666666667	4.88505	223.0	1	0
1.9288	4.03022	4.510566666666667	4.5216	223.0	1	0
1.9288	4.03022	1.9600666666666668	4.88505	223.0	1	0
1.9288	4.03022	1.9600666666666668	4.5216	223.0	1	0
1.9288	4.03022	4.510566666666667	4.88505	223.0	1	0
1.9288	4.03022	4.510566666666667	4.5216	223.0	1	0
1.9288	4.03022	1.9600666666666668	4.88505	223.0	1	0
1.9288	4.03022	1.9600666666666668	4.5216	223.0	1	0
1.9288	4.87714	4.510566666666667	4.88505	223.0	1	0
1.9288	4.87714	4.510566666666667	4.5216	223.0	1	0
1.9288	4.87714	1.9600666666666668	4.88505	223.0	1	0
1.9288	4.87714	1.9600666666666668	4.5216	223.0	1	0
1.9288	4.87714	4.510566666666667	4.88505	223.0	1	0
1.9288	4.87714	4.510566666666667	4.5216	223.0	1	0
1.9288	4.87714	1.9600666666666668	4.88505	223.0	1	0
1.9288	4.87714	1.9600666666666668	4.5216	223.0	1	0
1.9288	4.03022	4.510566666666667	4.88505	223.0	1	0
1.9288	4.03022	4.510566666666667	4.5216	223.0	1	0
1.9288	4.03022	1.9600666666666668	4.88505	223.0	1	0
1.9288	4.03022	1.9600666666666668	4.5216	223.0	1	0
1.9288	4.03022	4.510566666666667	4.88505	223.0	1	0
1.9288	4.03022	4.510566666666667	4.5216	223.0	1	0
1.9288	4.03022	1.9600666666666668	4.88505	223.0	1	0
1.9288	4.03022	1.9600666666666668	4.5216	223.0	1	0
1.7982	4.00672	1.7671	5.30945	229.0	0	0
3.8932	4.666939999999999	3.365133333333334	5.55	233.0	1	0
3.8932	4.666939999999999	3.365133333333334	7.3450500000000005	233.0	1	0
3.8932	4.666939999999999	3.7258	5.55	233.0	1	0
3.8932	4.666939999999999	3.7258	7.3450500000000005	233.0	1	1
3.8932	4.666939999999999	3.365133333333334	5.55	233.0	1	0
3.8932	4.666939999999999	3.365133333333334	7.3450500000000005	233.0	1	0
3.8932	4.666939999999999	3.7258	5.55	233.0	1	0
3.8932	4.666939999999999	3.7258	7.3450500000000005	233.0	1	1
3.8932	5.7082	3.365133333333334	5.55	233.0	1	0
3.8932	5.7082	3.365133333333334	7.3450500000000005	233.0	1	1
3.8932	5.7082	3.7258	5.55	233.0	1	0
3.8932	5.7082	3.7258	7.3450500000000005	233.0	1	1
3.8932	5.7082	3.365133333333334	5.55	233.0	1	0
3.8932	5.7082	3.365133333333334	7.3450500000000005	233.0	1	1
3.8932	5.7082	3.7258	5.55	233.0	1	0
3.8932	5.7082	3.7258	7.3450500000000005	233.0	1	1
3.8932	4.666939999999999	3.365133333333334	5.55	233.0	1	0
3.8932	4.666939999999999	3.365133333333334	7.3450500000000005	233.0	1	0
3.8932	4.666939999999999	3.7258	5.55	233.0	1	0
3.8932	4.666939999999999	3.7258	7.3450500000000005	233.0	1	1
3.8932	4.666939999999999	3.365133333333334	5.55	233.0	1	0
3.8932	4.666939999999999	3.365133333333334	7.3450500000000005	233.0	1	0
3.8932	4.666939999999999	3.7258	5.55	233.0	1	0
3.8932	4.666939999999999	3.7258	7.3450500000000005	233.0	1	1
3.8932	5.7082	3.365133333333334	5.55	233.0	1	0
3.8932	5.7082	3.365133333333334	7.3450500000000005	233.0	1	1
3.8932	5.7082	3.7258	5.55	233.0	1	0
3.8932	5.7082	3.7258	7.3450500000000005	233.0	1	1
3.8932	5.7082	3.365133333333334	5.55	233.0	1	0
3.8932	5.7082	3.365133333333334	7.3450500000000005	233.0	1	1
3.8932	5.7082	3.7258	5.55	233.0	1	0
3.8932	5.7082	3.7258	7.3450500000000005	233.0	1	1
3.0717	6.31142	6.343933333333333	4.7104	247.0	1	1
3.0717	6.31142	6.343933333333333	4.60505	247.0	1	1
3.0717	6.31142	3.567166666666667	4.7104	247.0	1	0
3.0717	6.31142	3.567166666666667	4.60505	247.0	1	0
3.0717	6.31142	6.343933333333333	4.7104	247.0	1	1
3.0717	6.31142	6.343933333333333	4.60505	247.0	1	1
3.0717	6.31142	3.567166666666667	4.7104	247.0	1	0
3.0717	6.31142	3.567166666666667	4.60505	247.0	1	0
3.0717	5.1865	6.343933333333333	4.7104	247.0	1	1
3.0717	5.1865	6.343933333333333	4.60505	247.0	1	1
3.0717	5.1865	3.567166666666667	4.7104	247.0	1	0
3.0717	5.1865	3.567166666666667	4.60505	247.0	1	0
3.0717	5.1865	6.343933333333333	4.7104	247.0	1	1
3.0717	5.1865	6.343933333333333	4.60505	247.0	1	1
3.0717	5.1865	3.567166666666667	4.7104	247.0	1	0
3.0717	5.1865	3.567166666666667	4.60505	247.0	1	0
3.0717	6.31142	6.343933333333333	4.7104	247.0	1	1
3.0717	6.31142	6.343933333333333	4.60505	247.0	1	1
3.0717	6.31142	3.567166666666667	4.7104	247.0	1	0
3.0717	6.31142	3.567166666666667	4.60505	247.0	1	0
3.0717	6.31142	6.343933333333333	4.7104	247.0	1	1
3.0717	6.31142	6.343933333333333	4.60505	247.0	1	1
3.0717	6.31142	3.567166666666667	4.7104	247.0	1	0
3.0717	6.31142	3.567166666666667	4.60505	247.0	1	0
3.0717	5.1865	6.343933333333333	4.7104	247.0	1	1
3.0717	5.1865	6.343933333333333	4.60505	247.0	1	1
3.0717	5.1865	3.567166666666667	4.7104	247.0	1	0
3.0717	5.1865	3.567166666666667	4.60505	247.0	1	0
3.0717	5.1865	6.343933333333333	4.7104	247.0	1	1
3.0717	5.1865	6.343933333333333	4.60505	247.0	1	1
3.0717	5.1865	3.567166666666667	4.7104	247.0	1	0
3.0717	5.1865	3.567166666666667	4.60505	247.0	1	0
4.1865	5.69868	5.340800000000001	5.9277	248.0	0	1
3.4144	5.84086	3.9404000000000003	6.16755	250.0	0	1
5.3786	6.71048	5.248066666666666	7.669650000000001	260.0	0	1
2.6956	3.43954	2.5058333333333334	3.32935	262.0	1	0
3.2082	4.78814	4.9947	4.0031	262.0	1	0
2.777	4.28208	3.8415	4.915	272.0	1	0
0.5812	3.2264600000000003	2.2136666666666667	3.36235	278.0	1	0
2.8533	4.54352	3.5178666666666665	3.04325	279.0	1	0
0.6178	2.6797199999999997	3.7649333333333335	3.1038	283.0	1	0
3.6477	5.7976	4.317666666666667	5.3683	291.0	0	1
1.1031	4.71846	2.800666666666667	2.7447	296.0	1	0
2.2789	5.97048	3.3495000000000004	3.14315	299.0	1	0
2.373	4.4887	3.280333333333333	3.8222	300.0	1	0
6.5719	9.386579999999999	7.2439	10.69355	300.0	1	1
5.1267	6.9509799999999995	5.3356	6.90225	303.0	0	1
0.8729	3.76486	2.184766666666667	4.8573	303.0	1	0
3.6198	4.29842	2.6300333333333334	4.5581000000000005	304.0	1	0
2.9887	5.14566	3.0927333333333333	5.879049999999999	314.0	0	0
3.8165	4.855320000000001	4.294433333333334	5.03385	315.0	1	0
1.6184	4.47856	3.7058999999999997	4.67675	322.0	0	0
4.0893	5.08862	4.454933333333333	5.8713	327.0	0	1
2.1057	3.71558	2.891833333333334	3.61355	328.0	0	0
5.3913	6.96072	6.575	6.7688500000000005	330.0	0	1
1.9038	3.8355000000000006	3.8554999999999997	4.556150000000001	341.0	0	0
0.0	4.204739999999999	2.4423333333333335	3.0547500000000003	344.0	1	0
2.5009	4.08238	3.0910999999999995	2.6203000000000003	345.0	0	0
4.7442	5.704040000000001	5.0985000000000005	5.67185	347.0	0	1
5.0059	5.61564	4.8003	5.2957	347.0	1	1
3.6636	4.750719999999999	2.566133333333333	1.8285999999999998	349.0	1	0
3.6636	4.750719999999999	2.566133333333333	6.6676	349.0	1	0
3.6636	4.750719999999999	4.9433333333333325	1.8285999999999998	349.0	1	0
3.6636	4.750719999999999	4.9433333333333325	6.6676	349.0	1	1
3.6636	4.750719999999999	2.566133333333333	1.8285999999999998	349.0	1	0
3.6636	4.750719999999999	2.566133333333333	6.6676	349.0	1	0
3.6636	4.750719999999999	4.9433333333333325	1.8285999999999998	349.0	1	0
3.6636	4.750719999999999	4.9433333333333325	6.6676	349.0	1	1
3.6636	6.09636	2.566133333333333	1.8285999999999998	349.0	1	0
3.6636	6.09636	2.566133333333333	6.6676	349.0	1	0
3.6636	6.09636	4.9433333333333325	1.8285999999999998	349.0	1	0
3.6636	6.09636	4.9433333333333325	6.6676	349.0	1	1
3.6636	6.09636	2.566133333333333	1.8285999999999998	349.0	1	0
3.6636	6.09636	2.566133333333333	6.6676	349.0	1	0
3.6636	6.09636	4.9433333333333325	1.8285999999999998	349.0	1	0
3.6636	6.09636	4.9433333333333325	6.6676	349.0	1	1
3.6636	4.750719999999999	2.566133333333333	1.8285999999999998	349.0	1	0
3.6636	4.750719999999999	2.566133333333333	6.6676	349.0	1	0
3.6636	4.750719999999999	4.9433333333333325	1.8285999999999998	349.0	1	0
3.6636	4.750719999999999	4.9433333333333325	6.6676	349.0	1	1
3.6636	4.750719999999999	2.566133333333333	1.8285999999999998	349.0	1	0
3.6636	4.750719999999999	2.566133333333333	6.6676	349.0	1	0
3.6636	4.750719999999999	4.9433333333333325	1.8285999999999998	349.0	1	0
3.6636	4.750719999999999	4.9433333333333325	6.6676	349.0	1	1
3.6636	6.09636	2.566133333333333	1.8285999999999998	349.0	1	0
3.6636	6.09636	2.566133333333333	6.6676	349.0	1	0
3.6636	6.09636	4.9433333333333325	1.8285999999999998	349.0	1	0
3.6636	6.09636	4.9433333333333325	6.6676	349.0	1	1
3.6636	6.09636	2.566133333333333	1.8285999999999998	349.0	1	0
3.6636	6.09636	2.566133333333333	6.6676	349.0	1	0
3.6636	6.09636	4.9433333333333325	1.8285999999999998	349.0	1	0
3.6636	6.09636	4.9433333333333325	6.6676	349.0	1	1
3.0155	4.457479999999999	3.6552333333333333	4.725	354.0	0	0
4.2264	5.66758	4.716566666666666	5.84695	357.0	0	1
0.6204	3.4156199999999997	2.954933333333333	1.54565	359.0	1	0
5.14	5.9169	5.7540000000000004	4.75085	359.0	0	1
2.0446	3.1453800000000003	2.453733333333333	3.434	361.0	0	0
4.0979	5.358700000000001	4.805466666666667	3.9386	361.0	0	0
6.2512	4.41356	3.677233333333333	4.5846	363.0	0	0
6.2512	4.41356	3.677233333333333	8.4186	363.0	0	1
6.2512	4.41356	6.521366666666666	4.5846	363.0	0	1
6.2512	4.41356	6.521366666666666	8.4186	363.0	0	1
6.2512	4.41356	3.677233333333333	4.5846	363.0	0	0
6.2512	4.41356	3.677233333333333	8.4186	363.0	0	1
6.2512	4.41356	6.521366666666666	4.5846	363.0	0	1
6.2512	4.41356	6.521366666666666	8.4186	363.0	0	1
6.2512	7.9378	3.677233333333333	4.5846	363.0	0	1
6.2512	7.9378	3.677233333333333	8.4186	363.0	0	1
6.2512	7.9378	6.521366666666666	4.5846	363.0	0	1
6.2512	7.9378	6.521366666666666	8.4186	363.0	0	1
6.2512	7.9378	3.677233333333333	4.5846	363.0	0	1
6.2512	7.9378	3.677233333333333	8.4186	363.0	0	1
6.2512	7.9378	6.521366666666666	4.5846	363.0	0	1
6.2512	7.9378	6.521366666666666	8.4186	363.0	0	1
6.2512	4.41356	3.677233333333333	4.5846	363.0	0	0
6.2512	4.41356	3.677233333333333	8.4186	363.0	0	1
6.2512	4.41356	6.521366666666666	4.5846	363.0	0	1
6.2512	4.41356	6.521366666666666	8.4186	363.0	0	1
6.2512	4.41356	3.677233333333333	4.5846	363.0	0	0
6.2512	4.41356	3.677233333333333	8.4186	363.0	0	1
6.2512	4.41356	6.521366666666666	4.5846	363.0	0	1
6.2512	4.41356	6.521366666666666	8.4186	363.0	0	1
6.2512	7.9378	3.677233333333333	4.5846	363.0	0	1
6.2512	7.9378	3.677233333333333	8.4186	363.0	0	1
6.2512	7.9378	6.521366666666666	4.5846	363.0	0	1
6.2512	7.9378	6.521366666666666	8.4186	363.0	0	1
6.2512	7.9378	3.677233333333333	4.5846	363.0	0	1
6.2512	7.9378	3.677233333333333	8.4186	363.0	0	1
6.2512	7.9378	6.521366666666666	4.5846	363.0	0	1
6.2512	7.9378	6.521366666666666	8.4186	363.0	0	1
3.2668	4.57334	3.8977	3.2226	363.0	0	0
0.5872	2.7020000000000004	1.6827333333333334	3.7148	365.0	0	0
2.4614	4.728260000000001	2.7958666666666665	4.75995	365.0	1	0
2.4808	5.3027	3.5341	5.73085	366.0	1	0
2.7212	4.499280000000001	3.6889	5.3977	366.0	0	0
0.7112	2.92692	2.6155000000000004	2.6910499999999997	372.0	0	0
2.8255	4.97304	4.6301	3.94465	373.0	1	0
2.364	5.01768	2.7665	5.2968	381.0	1	0
5.8032	7.95782	6.341066666666666	9.332799999999999	382.0	0	1
1.9318	3.378659999999999	4.271400000000001	2.4706	387.0	0	0
0.0	4.18358	2.743233333333333	5.735200000000001	387.0	0	0
0.9853	4.01976	2.4810333333333334	4.7394	390.0	0	0
5.468	6.03204	5.547366666666666	6.49255	394.0	1	1
5.468	6.03204	5.547366666666666	6.49255	394.0	1	1
5.468	6.03204	5.547366666666666	6.49255	394.0	1	1
5.468	6.03204	5.547366666666666	6.49255	394.0	1	1
2.7529	4.6432	3.1635666666666666	3.576	395.0	0	0
4.2077	4.89344	4.6154	5.84515	396.0	0	1
0.6226	4.18904	2.6733666666666664	4.7637	399.0	0	0
3.5077	5.170439999999999	4.3944	5.35825	400.0	0	0
3.7887	5.4465200000000005	4.215366666666667	5.496	406.0	0	0
2.2582	4.44288	2.4858666666666664	4.84715	406.0	0	0
2.2021	4.189539999999999	4.492933333333333	3.6243000000000003	408.0	0	0
6.2488	6.604699999999999	6.321266666666666	6.722049999999999	409.0	0	1
6.2488	6.604699999999999	6.321266666666666	6.20275	409.0	0	1
6.2488	6.604699999999999	3.6003666666666665	6.722049999999999	409.0	0	1
6.2488	6.604699999999999	3.6003666666666665	6.20275	409.0	0	1
6.2488	6.604699999999999	6.321266666666666	6.722049999999999	409.0	0	1
6.2488	6.604699999999999	6.321266666666666	6.20275	409.0	0	1
6.2488	6.604699999999999	3.6003666666666665	6.722049999999999	409.0	0	1
6.2488	6.604699999999999	3.6003666666666665	6.20275	409.0	0	1
6.2488	5.6677599999999995	6.321266666666666	6.722049999999999	409.0	0	1
6.2488	5.6677599999999995	6.321266666666666	6.20275	409.0	0	1
6.2488	5.6677599999999995	3.6003666666666665	6.722049999999999	409.0	0	1
6.2488	5.6677599999999995	3.6003666666666665	6.20275	409.0	0	1
6.2488	5.6677599999999995	6.321266666666666	6.722049999999999	409.0	0	1
6.2488	5.6677599999999995	6.321266666666666	6.20275	409.0	0	1
6.2488	5.6677599999999995	3.6003666666666665	6.722049999999999	409.0	0	1
6.2488	5.6677599999999995	3.6003666666666665	6.20275	409.0	0	1
6.2488	6.604699999999999	6.321266666666666	6.722049999999999	409.0	0	1
6.2488	6.604699999999999	6.321266666666666	6.20275	409.0	0	1
6.2488	6.604699999999999	3.6003666666666665	6.722049999999999	409.0	0	1
6.2488	6.604699999999999	3.6003666666666665	6.20275	409.0	0	1
6.2488	6.604699999999999	6.321266666666666	6.722049999999999	409.0	0	1
6.2488	6.604699999999999	6.321266666666666	6.20275	409.0	0	1
6.2488	6.604699999999999	3.6003666666666665	6.722049999999999	409.0	0	1
6.2488	6.604699999999999	3.6003666666666665	6.20275	409.0	0	1
6.2488	5.6677599999999995	6.321266666666666	6.722049999999999	409.0	0	1
6.2488	5.6677599999999995	6.321266666666666	6.20275	409.0	0	1
6.2488	5.6677599999999995	3.6003666666666665	6.722049999999999	409.0	0	1
6.2488	5.6677599999999995	3.6003666666666665	6.20275	409.0	0	1
6.2488	5.6677599999999995	6.321266666666666	6.722049999999999	409.0	0	1
6.2488	5.6677599999999995	6.321266666666666	6.20275	409.0	0	1
6.2488	5.6677599999999995	3.6003666666666665	6.722049999999999	409.0	0	1
6.2488	5.6677599999999995	3.6003666666666665	6.20275	409.0	0	1
0.7212	4.38266	1.6141333333333334	4.35285	410.0	1	0
3.7705	6.46862	6.0517	5.9915	412.0	1	1
5.4859	7.6845799999999995	6.277466666666666	9.163450000000001	412.0	0	1
3.5818	5.448099999999999	4.874366666666666	7.36585	415.0	0	1
3.7319	4.0258400000000005	3.5747666666666666	4.478949999999999	415.0	1	0
3.7319	4.0258400000000005	3.5747666666666666	6.2142	415.0	1	0
3.7319	4.0258400000000005	4.697133333333333	4.478949999999999	415.0	1	0
3.7319	4.0258400000000005	4.697133333333333	6.2142	415.0	1	0
3.7319	4.0258400000000005	3.5747666666666666	4.478949999999999	415.0	1	0
3.7319	4.0258400000000005	3.5747666666666666	6.2142	415.0	1	0
3.7319	4.0258400000000005	4.697133333333333	4.478949999999999	415.0	1	0
3.7319	4.0258400000000005	4.697133333333333	6.2142	415.0	1	0
3.7319	5.30494	3.5747666666666666	4.478949999999999	415.0	1	0
3.7319	5.30494	3.5747666666666666	6.2142	415.0	1	0
3.7319	5.30494	4.697133333333333	4.478949999999999	415.0	1	0
3.7319	5.30494	4.697133333333333	6.2142	415.0	1	1
3.7319	5.30494	3.5747666666666666	4.478949999999999	415.0	1	0
3.7319	5.30494	3.5747666666666666	6.2142	415.0	1	0
3.7319	5.30494	4.697133333333333	4.478949999999999	415.0	1	0
3.7319	5.30494	4.697133333333333	6.2142	415.0	1	1
3.7319	4.0258400000000005	3.5747666666666666	4.478949999999999	415.0	1	0
3.7319	4.0258400000000005	3.5747666666666666	6.2142	415.0	1	0
3.7319	4.0258400000000005	4.697133333333333	4.478949999999999	415.0	1	0
3.7319	4.0258400000000005	4.697133333333333	6.2142	415.0	1	0
3.7319	4.0258400000000005	3.5747666666666666	4.478949999999999	415.0	1	0
3.7319	4.0258400000000005	3.5747666666666666	6.2142	415.0	1	0
3.7319	4.0258400000000005	4.697133333333333	4.478949999999999	415.0	1	0
3.7319	4.0258400000000005	4.697133333333333	6.2142	415.0	1	0
3.7319	5.30494	3.5747666666666666	4.478949999999999	415.0	1	0
3.7319	5.30494	3.5747666666666666	6.2142	415.0	1	0
3.7319	5.30494	4.697133333333333	4.478949999999999	415.0	1	0
3.7319	5.30494	4.697133333333333	6.2142	415.0	1	1
3.7319	5.30494	3.5747666666666666	4.478949999999999	415.0	1	0
3.7319	5.30494	3.5747666666666666	6.2142	415.0	1	0
3.7319	5.30494	4.697133333333333	4.478949999999999	415.0	1	0
3.7319	5.30494	4.697133333333333	6.2142	415.0	1	1
4.2667	5.58538	4.0091	4.8988499999999995	416.0	1	0
2.6846	4.77514	1.7443333333333335	4.7096	419.0	1	0
6.1678	7.373279999999999	5.8388	8.98235	423.0	0	1
2.2955	3.9345999999999997	3.108233333333333	2.43675	425.0	0	0
3.828	5.17604	4.4191666666666665	4.5921	425.0	1	0
3.0973	5.6517800000000005	5.6409666666666665	6.379049999999999	427.0	0	1
0.8174	4.28896	4.041733333333333	3.1791	430.0	0	0
0.5993	3.3632800000000005	0.5394666666666666	4.208	432.0	1	0
3.7877	5.54152	3.6841333333333335	6.09325	436.0	0	0
2.7254	4.546359999999999	4.208833333333334	4.5599	438.0	1	0
2.7254	4.546359999999999	4.208833333333334	7.489000000000001	438.0	1	0
2.7254	4.546359999999999	5.054533333333333	4.5599	438.0	1	0
2.7254	4.546359999999999	5.054533333333333	7.489000000000001	438.0	1	1
2.7254	4.546359999999999	4.208833333333334	4.5599	438.0	1	0
2.7254	4.546359999999999	4.208833333333334	7.489000000000001	438.0	1	0
2.7254	4.546359999999999	5.054533333333333	4.5599	438.0	1	0
2.7254	4.546359999999999	5.054533333333333	7.489000000000001	438.0	1	1
2.7254	6.35442	4.208833333333334	4.5599	438.0	1	0
2.7254	6.35442	4.208833333333334	7.489000000000001	438.0	1	1
2.7254	6.35442	5.054533333333333	4.5599	438.0	1	0
2.7254	6.35442	5.054533333333333	7.489000000000001	438.0	1	1
2.7254	6.35442	4.208833333333334	4.5599	438.0	1	0
2.7254	6.35442	4.208833333333334	7.489000000000001	438.0	1	1
2.7254	6.35442	5.054533333333333	4.5599	438.0	1	0
2.7254	6.35442	5.054533333333333	7.489000000000001	438.0	1	1
2.7254	4.546359999999999	4.208833333333334	4.5599	438.0	1	0
2.7254	4.546359999999999	4.208833333333334	7.489000000000001	438.0	1	0
2.7254	4.546359999999999	5.054533333333333	4.5599	438.0	1	0
2.7254	4.546359999999999	5.054533333333333	7.489000000000001	438.0	1	1
2.7254	4.546359999999999	4.208833333333334	4.5599	438.0	1	0
2.7254	4.546359999999999	4.208833333333334	7.489000000000001	438.0	1	0
2.7254	4.546359999999999	5.054533333333333	4.5599	438.0	1	0
2.7254	4.546359999999999	5.054533333333333	7.489000000000001	438.0	1	1
2.7254	6.35442	4.208833333333334	4.5599	438.0	1	0
2.7254	6.35442	4.208833333333334	7.489000000000001	438.0	1	1
2.7254	6.35442	5.054533333333333	4.5599	438.0	1	0
2.7254	6.35442	5.054533333333333	7.489000000000001	438.0	1	1
2.7254	6.35442	4.208833333333334	4.5599	438.0	1	0
2.7254	6.35442	4.208833333333334	7.489000000000001	438.0	1	1
2.7254	6.35442	5.054533333333333	4.5599	438.0	1	0
2.7254	6.35442	5.054533333333333	7.489000000000001	438.0	1	1
4.7696	6.511699999999999	5.282	5.2452	444.0	0	1
3.2357	4.949039999999999	2.044033333333333	5.180149999999999	447.0	0	0
3.5067	5.720479999999999	5.616766666666667	5.70115	449.0	0	1
4.5419	6.091500000000001	5.351233333333333	5.57275	452.0	1	1
5.9937	8.14358	6.125333333333334	8.50045	453.0	0	1
3.3867	4.77836	4.029599999999999	4.5003	458.0	0	0
2.6085	4.95302	3.7609999999999997	3.1789	468.0	0	0
4.2142	5.2431	3.273433333333333	5.3841	469.0	1	0
2.8634	3.54752	3.1339	4.84295	472.0	0	0
5.374	7.644980000000001	5.624099999999999	7.770300000000001	474.0	0	1
3.1741	4.97968	3.155133333333333	5.6542	476.0	0	0
1.879	4.72166	3.1772666666666667	5.5802	478.0	0	0
4.6918	6.28836	4.2246	6.8957	480.0	0	1
5.8285	7.17654	6.0212	7.92955	486.0	0	1
2.7382	3.5691200000000003	2.3062666666666667	2.60075	500.0	0	0
3.4773	5.17684	3.4155333333333338	6.52775	507.0	0	0
4.2247	5.5654	4.934566666666666	6.086650000000001	512.0	0	1
8.0555	9.609679999999999	7.713933333333332	10.407	519.0	0	1
1.1051	4.557440000000001	3.147066666666667	5.946	520.0	0	0
4.4739	5.809340000000001	4.959366666666667	5.0864	520.0	0	1
3.3873	4.321420000000001	2.6095333333333333	4.29955	535.0	1	0
3.3873	4.321420000000001	2.6095333333333333	5.97565	535.0	1	0
3.3873	4.321420000000001	3.2625333333333333	4.29955	535.0	1	0
3.3873	4.321420000000001	3.2625333333333333	5.97565	535.0	1	0
3.3873	4.321420000000001	2.6095333333333333	4.29955	535.0	1	0
3.3873	4.321420000000001	2.6095333333333333	5.97565	535.0	1	0
3.3873	4.321420000000001	3.2625333333333333	4.29955	535.0	1	0
3.3873	4.321420000000001	3.2625333333333333	5.97565	535.0	1	0
3.3873	5.72068	2.6095333333333333	4.29955	535.0	1	0
3.3873	5.72068	2.6095333333333333	5.97565	535.0	1	0
3.3873	5.72068	3.2625333333333333	4.29955	535.0	1	0
3.3873	5.72068	3.2625333333333333	5.97565	535.0	1	0
3.3873	5.72068	2.6095333333333333	4.29955	535.0	1	0
3.3873	5.72068	2.6095333333333333	5.97565	535.0	1	0
3.3873	5.72068	3.2625333333333333	4.29955	535.0	1	0
3.3873	5.72068	3.2625333333333333	5.97565	535.0	1	0
3.3873	4.321420000000001	2.6095333333333333	4.29955	535.0	1	0
3.3873	4.321420000000001	2.6095333333333333	5.97565	535.0	1	0
3.3873	4.321420000000001	3.2625333333333333	4.29955	535.0	1	0
3.3873	4.321420000000001	3.2625333333333333	5.97565	535.0	1	0
3.3873	4.321420000000001	2.6095333333333333	4.29955	535.0	1	0
3.3873	4.321420000000001	2.6095333333333333	5.97565	535.0	1	0
3.3873	4.321420000000001	3.2625333333333333	4.29955	535.0	1	0
3.3873	4.321420000000001	3.2625333333333333	5.97565	535.0	1	0
3.3873	5.72068	2.6095333333333333	4.29955	535.0	1	0
3.3873	5.72068	2.6095333333333333	5.97565	535.0	1	0
3.3873	5.72068	3.2625333333333333	4.29955	535.0	1	0
3.3873	5.72068	3.2625333333333333	5.97565	535.0	1	0
3.3873	5.72068	2.6095333333333333	4.29955	535.0	1	0
3.3873	5.72068	2.6095333333333333	5.97565	535.0	1	0
3.3873	5.72068	3.2625333333333333	4.29955	535.0	1	0
3.3873	5.72068	3.2625333333333333	5.97565	535.0	1	0
3.6919	5.83328	4.7250000000000005	7.450799999999999	538.0	0	1
0.8711	2.47774	1.322	1.8186499999999999	547.0	1	0
3.6598	4.47138	4.022233333333333	3.57555	552.0	0	0
3.6438	4.69818	3.7792666666666666	2.7566	554.0	0	0
3.1379	5.136100000000001	3.7008999999999994	5.168200000000001	555.0	0	0
2.9002	3.1748	2.2413333333333334	3.5652	555.0	0	0
3.7532	5.4633400000000005	3.7571999999999997	5.1146	555.0	1	0
0.0	2.2915	0.0	2.6076	556.0	1	0
1.8117	4.679180000000001	4.856133333333333	4.72725	558.0	1	0
6.341	7.79768	6.557033333333334	8.6558	562.0	0	1
5.0306	6.87846	5.149166666666667	7.693149999999999	564.0	0	1
1.0874	3.90308	2.1269666666666667	3.74075	566.0	0	0
2.7223	5.2480199999999995	5.771699999999999	7.058949999999999	570.0	0	1
2.7223	5.2480199999999995	5.771699999999999	4.5813	570.0	0	0
2.7223	5.2480199999999995	2.3211333333333335	7.058949999999999	570.0	0	0
2.7223	5.2480199999999995	2.3211333333333335	4.5813	570.0	0	0
2.7223	5.2480199999999995	5.771699999999999	7.058949999999999	570.0	0	1
2.7223	5.2480199999999995	5.771699999999999	4.5813	570.0	0	0
2.7223	5.2480199999999995	2.3211333333333335	7.058949999999999	570.0	0	0
2.7223	5.2480199999999995	2.3211333333333335	4.5813	570.0	0	0
2.7223	2.77412	5.771699999999999	7.058949999999999	570.0	0	0
2.7223	2.77412	5.771699999999999	4.5813	570.0	0	0
2.7223	2.77412	2.3211333333333335	7.058949999999999	570.0	0	0
2.7223	2.77412	2.3211333333333335	4.5813	570.0	0	0
2.7223	2.77412	5.771699999999999	7.058949999999999	570.0	0	0
2.7223	2.77412	5.771699999999999	4.5813	570.0	0	0
2.7223	2.77412	2.3211333333333335	7.058949999999999	570.0	0	0
2.7223	2.77412	2.3211333333333335	4.5813	570.0	0	0
2.7223	5.2480199999999995	5.771699999999999	7.058949999999999	570.0	0	1
2.7223	5.2480199999999995	5.771699999999999	4.5813	570.0	0	0
2.7223	5.2480199999999995	2.3211333333333335	7.058949999999999	570.0	0	0
2.7223	5.2480199999999995	2.3211333333333335	4.5813	570.0	0	0
2.7223	5.2480199999999995	5.771699999999999	7.058949999999999	570.0	0	1
2.7223	5.2480199999999995	5.771699999999999	4.5813	570.0	0	0
2.7223	5.2480199999999995	2.3211333333333335	7.058949999999999	570.0	0	0
2.7223	5.2480199999999995	2.3211333333333335	4.5813	570.0	0	0
2.7223	2.77412	5.771699999999999	7.058949999999999	570.0	0	0
2.7223	2.77412	5.771699999999999	4.5813	570.0	0	0
2.7223	2.77412	2.3211333333333335	7.058949999999999	570.0	0	0
2.7223	2.77412	2.3211333333333335	4.5813	570.0	0	0
2.7223	2.77412	5.771699999999999	7.058949999999999	570.0	0	0
2.7223	2.77412	5.771699999999999	4.5813	570.0	0	0
2.7223	2.77412	2.3211333333333335	7.058949999999999	570.0	0	0
2.7223	2.77412	2.3211333333333335	4.5813	570.0	0	0
2.0167	4.2654000000000005	4.625233333333333	4.88235	574.0	0	0
4.8144	7.1009	5.7224	7.31995	575.0	0	1
4.9157	5.87474	5.1452	5.7716	579.0	0	1
6.4723	6.747019999999999	5.791700000000001	8.341999999999999	581.0	1	1
6.4723	6.747019999999999	5.791700000000001	4.5352	581.0	1	1
6.4723	6.747019999999999	1.8775666666666668	8.341999999999999	581.0	1	1
6.4723	6.747019999999999	1.8775666666666668	4.5352	581.0	1	1
6.4723	6.747019999999999	5.791700000000001	8.341999999999999	581.0	1	1
6.4723	6.747019999999999	5.791700000000001	4.5352	581.0	1	1
6.4723	6.747019999999999	1.8775666666666668	8.341999999999999	581.0	1	1
6.4723	6.747019999999999	1.8775666666666668	4.5352	581.0	1	1
6.4723	3.3848	5.791700000000001	8.341999999999999	581.0	1	1
6.4723	3.3848	5.791700000000001	4.5352	581.0	1	1
6.4723	3.3848	1.8775666666666668	8.341999999999999	581.0	1	1
6.4723	3.3848	1.8775666666666668	4.5352	581.0	1	0
6.4723	3.3848	5.791700000000001	8.341999999999999	581.0	1	1
6.4723	3.3848	5.791700000000001	4.5352	581.0	1	1
6.4723	3.3848	1.8775666666666668	8.341999999999999	581.0	1	1
6.4723	3.3848	1.8775666666666668	4.5352	581.0	1	0
6.4723	6.747019999999999	5.791700000000001	8.341999999999999	581.0	1	1
6.4723	6.747019999999999	5.791700000000001	4.5352	581.0	1	1
6.4723	6.747019999999999	1.8775666666666668	8.341999999999999	581.0	1	1
6.4723	6.747019999999999	1.8775666666666668	4.5352	581.0	1	1
6.4723	6.747019999999999	5.791700000000001	8.341999999999999	581.0	1	1
6.4723	6.747019999999999	5.791700000000001	4.5352	581.0	1	1
6.4723	6.747019999999999	1.8775666666666668	8.341999999999999	581.0	1	1
6.4723	6.747019999999999	1.8775666666666668	4.5352	581.0	1	1
6.4723	3.3848	5.791700000000001	8.341999999999999	581.0	1	1
6.4723	3.3848	5.791700000000001	4.5352	581.0	1	1
6.4723	3.3848	1.8775666666666668	8.341999999999999	581.0	1	1
6.4723	3.3848	1.8775666666666668	4.5352	581.0	1	0
6.4723	3.3848	5.791700000000001	8.341999999999999	581.0	1	1
6.4723	3.3848	5.791700000000001	4.5352	581.0	1	1
6.4723	3.3848	1.8775666666666668	8.341999999999999	581.0	1	1
6.4723	3.3848	1.8775666666666668	4.5352	581.0	1	0
5.1044	6.96058	5.7504333333333335	7.6884999999999994	585.0	0	1
3.2646	3.8517200000000003	2.9672	3.95325	587.0	0	0
1.4843	4.34916	5.210766666666667	4.7959499999999995	588.0	0	0
0.8184	3.656	2.0686	3.96195	594.0	0	0
3.121	4.9780999999999995	3.8133000000000004	5.44355	596.0	1	0
1.6045	3.6381799999999997	2.1738	4.8748000000000005	601.0	1	0
1.6045	3.6381799999999997	2.1738	4.643000000000001	601.0	1	0
1.6045	3.6381799999999997	0.6147666666666667	4.8748000000000005	601.0	1	0
1.6045	3.6381799999999997	0.6147666666666667	4.643000000000001	601.0	1	0
1.6045	3.6381799999999997	2.1738	4.8748000000000005	601.0	1	0
1.6045	3.6381799999999997	2.1738	4.643000000000001	601.0	1	0
1.6045	3.6381799999999997	0.6147666666666667	4.8748000000000005	601.0	1	0
1.6045	3.6381799999999997	0.6147666666666667	4.643000000000001	601.0	1	0
1.6045	2.90548	2.1738	4.8748000000000005	601.0	1	0
1.6045	2.90548	2.1738	4.643000000000001	601.0	1	0
1.6045	2.90548	0.6147666666666667	4.8748000000000005	601.0	1	0
1.6045	2.90548	0.6147666666666667	4.643000000000001	601.0	1	0
1.6045	2.90548	2.1738	4.8748000000000005	601.0	1	0
1.6045	2.90548	2.1738	4.643000000000001	601.0	1	0
1.6045	2.90548	0.6147666666666667	4.8748000000000005	601.0	1	0
1.6045	2.90548	0.6147666666666667	4.643000000000001	601.0	1	0
1.6045	3.6381799999999997	2.1738	4.8748000000000005	601.0	1	0
1.6045	3.6381799999999997	2.1738	4.643000000000001	601.0	1	0
1.6045	3.6381799999999997	0.6147666666666667	4.8748000000000005	601.0	1	0
1.6045	3.6381799999999997	0.6147666666666667	4.643000000000001	601.0	1	0
1.6045	3.6381799999999997	2.1738	4.8748000000000005	601.0	1	0
1.6045	3.6381799999999997	2.1738	4.643000000000001	601.0	1	0
1.6045	3.6381799999999997	0.6147666666666667	4.8748000000000005	601.0	1	0
1.6045	3.6381799999999997	0.6147666666666667	4.643000000000001	601.0	1	0
1.6045	2.90548	2.1738	4.8748000000000005	601.0	1	0
1.6045	2.90548	2.1738	4.643000000000001	601.0	1	0
1.6045	2.90548	0.6147666666666667	4.8748000000000005	601.0	1	0
1.6045	2.90548	0.6147666666666667	4.643000000000001	601.0	1	0
1.6045	2.90548	2.1738	4.8748000000000005	601.0	1	0
1.6045	2.90548	2.1738	4.643000000000001	601.0	1	0
1.6045	2.90548	0.6147666666666667	4.8748000000000005	601.0	1	0
1.6045	2.90548	0.6147666666666667	4.643000000000001	601.0	1	0
0.554	2.35332	2.682366666666667	2.96385	601.0	0	0
6.771	8.43186	7.702766666666666	9.18765	602.0	0	1
6.771	8.43186	7.702766666666666	5.63185	602.0	0	1
6.771	8.43186	2.2212	9.18765	602.0	0	1
6.771	8.43186	2.2212	5.63185	602.0	0	1
6.771	8.43186	7.702766666666666	9.18765	602.0	0	1
6.771	8.43186	7.702766666666666	5.63185	602.0	0	1
6.771	8.43186	2.2212	9.18765	602.0	0	1
6.771	8.43186	2.2212	5.63185	602.0	0	1
6.771	5.0068600000000005	7.702766666666666	9.18765	602.0	0	1
6.771	5.0068600000000005	7.702766666666666	5.63185	602.0	0	1
6.771	5.0068600000000005	2.2212	9.18765	602.0	0	1
6.771	5.0068600000000005	2.2212	5.63185	602.0	0	1
6.771	5.0068600000000005	7.702766666666666	9.18765	602.0	0	1
6.771	5.0068600000000005	7.702766666666666	5.63185	602.0	0	1
6.771	5.0068600000000005	2.2212	9.18765	602.0	0	1
6.771	5.0068600000000005	2.2212	5.63185	602.0	0	1
6.771	8.43186	7.702766666666666	9.18765	602.0	0	1
6.771	8.43186	7.702766666666666	5.63185	602.0	0	1
6.771	8.43186	2.2212	9.18765	602.0	0	1
6.771	8.43186	2.2212	5.63185	602.0	0	1
6.771	8.43186	7.702766666666666	9.18765	602.0	0	1
6.771	8.43186	7.702766666666666	5.63185	602.0	0	1
6.771	8.43186	2.2212	9.18765	602.0	0	1
6.771	8.43186	2.2212	5.63185	602.0	0	1
6.771	5.0068600000000005	7.702766666666666	9.18765	602.0	0	1
6.771	5.0068600000000005	7.702766666666666	5.63185	602.0	0	1
6.771	5.0068600000000005	2.2212	9.18765	602.0	0	1
6.771	5.0068600000000005	2.2212	5.63185	602.0	0	1
6.771	5.0068600000000005	7.702766666666666	9.18765	602.0	0	1
6.771	5.0068600000000005	7.702766666666666	5.63185	602.0	0	1
6.771	5.0068600000000005	2.2212	9.18765	602.0	0	1
6.771	5.0068600000000005	2.2212	5.63185	602.0	0	1
5.5231	7.06144	6.0625	8.6241	608.0	0	1
2.8235	3.49118	2.610666666666667	3.6254500000000003	608.0	0	0
2.8235	3.49118	2.610666666666667	5.5812	608.0	0	0
2.8235	3.49118	3.5474333333333337	3.6254500000000003	608.0	0	0
2.8235	3.49118	3.5474333333333337	5.5812	608.0	0	0
2.8235	3.49118	2.610666666666667	3.6254500000000003	608.0	0	0
2.8235	3.49118	2.610666666666667	5.5812	608.0	0	0
2.8235	3.49118	3.5474333333333337	3.6254500000000003	608.0	0	0
2.8235	3.49118	3.5474333333333337	5.5812	608.0	0	0
2.8235	4.89204	2.610666666666667	3.6254500000000003	608.0	0	0
2.8235	4.89204	2.610666666666667	5.5812	608.0	0	0
2.8235	4.89204	3.5474333333333337	3.6254500000000003	608.0	0	0
2.8235	4.89204	3.5474333333333337	5.5812	608.0	0	0
2.8235	4.89204	2.610666666666667	3.6254500000000003	608.0	0	0
2.8235	4.89204	2.610666666666667	5.5812	608.0	0	0
2.8235	4.89204	3.5474333333333337	3.6254500000000003	608.0	0	0
2.8235	4.89204	3.5474333333333337	5.5812	608.0	0	0
2.8235	3.49118	2.610666666666667	3.6254500000000003	608.0	0	0
2.8235	3.49118	2.610666666666667	5.5812	608.0	0	0
2.8235	3.49118	3.5474333333333337	3.6254500000000003	608.0	0	0
2.8235	3.49118	3.5474333333333337	5.5812	608.0	0	0
2.8235	3.49118	2.610666666666667	3.6254500000000003	608.0	0	0
2.8235	3.49118	2.610666666666667	5.5812	608.0	0	0
2.8235	3.49118	3.5474333333333337	3.6254500000000003	608.0	0	0
2.8235	3.49118	3.5474333333333337	5.5812	608.0	0	0
2.8235	4.89204	2.610666666666667	3.6254500000000003	608.0	0	0
2.8235	4.89204	2.610666666666667	5.5812	608.0	0	0
2.8235	4.89204	3.5474333333333337	3.6254500000000003	608.0	0	0
2.8235	4.89204	3.5474333333333337	5.5812	608.0	0	0
2.8235	4.89204	2.610666666666667	3.6254500000000003	608.0	0	0
2.8235	4.89204	2.610666666666667	5.5812	608.0	0	0
2.8235	4.89204	3.5474333333333337	3.6254500000000003	608.0	0	0
2.8235	4.89204	3.5474333333333337	5.5812	608.0	0	0
3.123	1.8894600000000001	0.4546666666666667	0.8744	612.0	1	0
3.123	1.8894600000000001	0.4546666666666667	7.1824	612.0	1	0
3.123	1.8894600000000001	2.4526000000000003	0.8744	612.0	1	0
3.123	1.8894600000000001	2.4526000000000003	7.1824	612.0	1	0
3.123	1.8894600000000001	0.4546666666666667	0.8744	612.0	1	0
3.123	1.8894600000000001	0.4546666666666667	7.1824	612.0	1	0
3.123	1.8894600000000001	2.4526000000000003	0.8744	612.0	1	0
3.123	1.8894600000000001	2.4526000000000003	7.1824	612.0	1	0
3.123	4.79092	0.4546666666666667	0.8744	612.0	1	0
3.123	4.79092	0.4546666666666667	7.1824	612.0	1	0
3.123	4.79092	2.4526000000000003	0.8744	612.0	1	0
3.123	4.79092	2.4526000000000003	7.1824	612.0	1	0
3.123	4.79092	0.4546666666666667	0.8744	612.0	1	0
3.123	4.79092	0.4546666666666667	7.1824	612.0	1	0
3.123	4.79092	2.4526000000000003	0.8744	612.0	1	0
3.123	4.79092	2.4526000000000003	7.1824	612.0	1	0
3.123	1.8894600000000001	0.4546666666666667	0.8744	612.0	1	0
3.123	1.8894600000000001	0.4546666666666667	7.1824	612.0	1	0
3.123	1.8894600000000001	2.4526000000000003	0.8744	612.0	1	0
3.123	1.8894600000000001	2.4526000000000003	7.1824	612.0	1	0
3.123	1.8894600000000001	0.4546666666666667	0.8744	612.0	1	0
3.123	1.8894600000000001	0.4546666666666667	7.1824	612.0	1	0
3.123	1.8894600000000001	2.4526000000000003	0.8744	612.0	1	0
3.123	1.8894600000000001	2.4526000000000003	7.1824	612.0	1	0
3.123	4.79092	0.4546666666666667	0.8744	612.0	1	0
3.123	4.79092	0.4546666666666667	7.1824	612.0	1	0
3.123	4.79092	2.4526000000000003	0.8744	612.0	1	0
3.123	4.79092	2.4526000000000003	7.1824	612.0	1	0
3.123	4.79092	0.4546666666666667	0.8744	612.0	1	0
3.123	4.79092	0.4546666666666667	7.1824	612.0	1	0
3.123	4.79092	2.4526000000000003	0.8744	612.0	1	0
3.123	4.79092	2.4526000000000003	7.1824	612.0	1	0
2.8599	5.321199999999999	3.4871	4.69335	615.0	0	0
2.9519	3.5858000000000003	3.747	3.4768999999999997	621.0	0	0
5.97	7.5525	6.6703	8.3264	627.0	1	1
5.0527	6.71926	4.853366666666666	7.10455	631.0	0	1
3.5519	5.0572	3.2246333333333332	5.5408	632.0	0	0
0.0	3.15854	1.9463666666666668	3.9729	636.0	0	0
4.8967	6.7649	6.671499999999999	7.71935	638.0	0	1
4.6857	5.43802	5.791733333333333	3.9863	639.0	1	1
4.2939	6.314699999999999	4.5697	5.55125	640.0	0	1
2.3394	7.939439999999999	5.537466666666667	8.39105	643.0	1	1
2.3394	7.939439999999999	5.537466666666667	6.642049999999999	643.0	1	1
2.3394	7.939439999999999	3.773066666666667	8.39105	643.0	1	1
2.3394	7.939439999999999	3.773066666666667	6.642049999999999	643.0	1	1
2.3394	7.939439999999999	5.537466666666667	8.39105	643.0	1	1
2.3394	7.939439999999999	5.537466666666667	6.642049999999999	643.0	1	1
2.3394	7.939439999999999	3.773066666666667	8.39105	643.0	1	1
2.3394	7.939439999999999	3.773066666666667	6.642049999999999	643.0	1	1
2.3394	5.25736	5.537466666666667	8.39105	643.0	1	1
2.3394	5.25736	5.537466666666667	6.642049999999999	643.0	1	1
2.3394	5.25736	3.773066666666667	8.39105	643.0	1	1
2.3394	5.25736	3.773066666666667	6.642049999999999	643.0	1	0
2.3394	5.25736	5.537466666666667	8.39105	643.0	1	1
2.3394	5.25736	5.537466666666667	6.642049999999999	643.0	1	1
2.3394	5.25736	3.773066666666667	8.39105	643.0	1	1
2.3394	5.25736	3.773066666666667	6.642049999999999	643.0	1	0
2.3394	7.939439999999999	5.537466666666667	8.39105	643.0	1	1
2.3394	7.939439999999999	5.537466666666667	6.642049999999999	643.0	1	1
2.3394	7.939439999999999	3.773066666666667	8.39105	643.0	1	1
2.3394	7.939439999999999	3.773066666666667	6.642049999999999	643.0	1	1
2.3394	7.939439999999999	5.537466666666667	8.39105	643.0	1	1
2.3394	7.939439999999999	5.537466666666667	6.642049999999999	643.0	1	1
2.3394	7.939439999999999	3.773066666666667	8.39105	643.0	1	1
2.3394	7.939439999999999	3.773066666666667	6.642049999999999	643.0	1	1
2.3394	5.25736	5.537466666666667	8.39105	643.0	1	1
2.3394	5.25736	5.537466666666667	6.642049999999999	643.0	1	1
2.3394	5.25736	3.773066666666667	8.39105	643.0	1	1
2.3394	5.25736	3.773066666666667	6.642049999999999	643.0	1	0
2.3394	5.25736	5.537466666666667	8.39105	643.0	1	1
2.3394	5.25736	5.537466666666667	6.642049999999999	643.0	1	1
2.3394	5.25736	3.773066666666667	8.39105	643.0	1	1
2.3394	5.25736	3.773066666666667	6.642049999999999	643.0	1	0
3.7628	5.93328	4.156433333333333	6.814299999999999	644.0	0	1
0.7949	3.1242399999999995	1.2835	2.4483	649.0	1	0
3.4928	4.32544	4.332233333333334	3.45875	655.0	0	0
4.6481	5.926559999999999	4.8747	5.6907499999999995	658.0	0	1
0.6606	2.6595	2.9929333333333332	1.6495	660.0	1	0
2.6072	4.5418199999999995	3.869266666666667	3.72495	662.0	0	0
2.6072	4.5418199999999995	3.869266666666667	5.47215	662.0	0	0
2.6072	4.5418199999999995	3.6717333333333335	3.72495	662.0	0	0
2.6072	4.5418199999999995	3.6717333333333335	5.47215	662.0	0	0
2.6072	4.5418199999999995	3.869266666666667	3.72495	662.0	0	0
2.6072	4.5418199999999995	3.869266666666667	5.47215	662.0	0	0
2.6072	4.5418199999999995	3.6717333333333335	3.72495	662.0	0	0
2.6072	4.5418199999999995	3.6717333333333335	5.47215	662.0	0	0
2.6072	4.88802	3.869266666666667	3.72495	662.0	0	0
2.6072	4.88802	3.869266666666667	5.47215	662.0	0	0
2.6072	4.88802	3.6717333333333335	3.72495	662.0	0	0
2.6072	4.88802	3.6717333333333335	5.47215	662.0	0	0
2.6072	4.88802	3.869266666666667	3.72495	662.0	0	0
2.6072	4.88802	3.869266666666667	5.47215	662.0	0	0
2.6072	4.88802	3.6717333333333335	3.72495	662.0	0	0
2.6072	4.88802	3.6717333333333335	5.47215	662.0	0	0
2.6072	4.5418199999999995	3.869266666666667	3.72495	662.0	0	0
2.6072	4.5418199999999995	3.869266666666667	5.47215	662.0	0	0
2.6072	4.5418199999999995	3.6717333333333335	3.72495	662.0	0	0
2.6072	4.5418199999999995	3.6717333333333335	5.47215	662.0	0	0
2.6072	4.5418199999999995	3.869266666666667	3.72495	662.0	0	0
2.6072	4.5418199999999995	3.869266666666667	5.47215	662.0	0	0
2.6072	4.5418199999999995	3.6717333333333335	3.72495	662.0	0	0
2.6072	4.5418199999999995	3.6717333333333335	5.47215	662.0	0	0
2.6072	4.88802	3.869266666666667	3.72495	662.0	0	0
2.6072	4.88802	3.869266666666667	5.47215	662.0	0	0
2.6072	4.88802	3.6717333333333335	3.72495	662.0	0	0
2.6072	4.88802	3.6717333333333335	5.47215	662.0	0	0
2.6072	4.88802	3.869266666666667	3.72495	662.0	0	0
2.6072	4.88802	3.869266666666667	5.47215	662.0	0	0
2.6072	4.88802	3.6717333333333335	3.72495	662.0	0	0
2.6072	4.88802	3.6717333333333335	5.47215	662.0	0	0
1.1508	2.50528	3.6499	2.30545	671.0	0	0
1.9001	3.8337000000000003	3.1460333333333335	2.6225500000000004	672.0	0	0
3.5529	4.260540000000001	4.273266666666667	5.20305	673.0	0	0
3.5408	4.66218	3.2175999999999996	4.5710999999999995	680.0	0	0
0.8951	2.97676	1.5338	3.1854500000000003	688.0	1	0
0.8951	2.97676	1.5338	3.1854500000000003	688.0	1	0
0.8951	2.97676	1.5338	3.1854500000000003	688.0	1	0
0.8951	2.97676	1.5338	3.1854500000000003	688.0	1	0
4.1576	5.1671	3.5900999999999996	5.8543	693.0	1	0
0.0	2.55988	2.3304666666666667	1.6924000000000001	693.0	0	0
3.2545	4.86794	4.4419	5.45925	697.0	0	0
5.8009	7.32788	6.627733333333333	7.5973	698.0	0	1
1.4765	3.6010199999999997	2.850966666666667	3.2037	698.0	0	0
3.1388	4.40054	4.726233333333333	6.1283	701.0	0	0
1.3471	2.67704	1.5974666666666666	3.1965000000000003	719.0	0	0
1.7073	3.3322000000000003	3.3815333333333335	3.79725	722.0	0	0
3.1256	5.1186	3.568633333333333	6.95245	728.0	0	0
5.0139	5.85004	5.036466666666667	6.54615	729.0	0	1
3.2359	5.855580000000001	5.421566666666667	6.58075	744.0	0	1
2.2028	4.397959999999999	3.637366666666667	4.62485	756.0	0	0
6.4018	8.54026	6.9312000000000005	9.008700000000001	757.0	1	1
3.2502	5.5616	3.0717	3.71935	763.0	0	0
0.8697	2.02302	2.4303	2.4684999999999997	768.0	1	0
2.694	4.43982	2.9696	5.3395	770.0	1	0
2.694	4.43982	2.9696	6.2322500000000005	770.0	1	0
2.694	4.43982	4.6275	5.3395	770.0	1	0
2.694	4.43982	4.6275	6.2322500000000005	770.0	1	0
2.694	4.43982	2.9696	5.3395	770.0	1	0
2.694	4.43982	2.9696	6.2322500000000005	770.0	1	0
2.694	4.43982	4.6275	5.3395	770.0	1	0
2.694	4.43982	4.6275	6.2322500000000005	770.0	1	0
2.694	5.082879999999999	2.9696	5.3395	770.0	1	0
2.694	5.082879999999999	2.9696	6.2322500000000005	770.0	1	0
2.694	5.082879999999999	4.6275	5.3395	770.0	1	0
2.694	5.082879999999999	4.6275	6.2322500000000005	770.0	1	0
2.694	5.082879999999999	2.9696	5.3395	770.0	1	0
2.694	5.082879999999999	2.9696	6.2322500000000005	770.0	1	0
2.694	5.082879999999999	4.6275	5.3395	770.0	1	0
2.694	5.082879999999999	4.6275	6.2322500000000005	770.0	1	0
2.694	4.43982	2.9696	5.3395	770.0	1	0
2.694	4.43982	2.9696	6.2322500000000005	770.0	1	0
2.694	4.43982	4.6275	5.3395	770.0	1	0
2.694	4.43982	4.6275	6.2322500000000005	770.0	1	0
2.694	4.43982	2.9696	5.3395	770.0	1	0
2.694	4.43982	2.9696	6.2322500000000005	770.0	1	0
2.694	4.43982	4.6275	5.3395	770.0	1	0
2.694	4.43982	4.6275	6.2322500000000005	770.0	1	0
2.694	5.082879999999999	2.9696	5.3395	770.0	1	0
2.694	5.082879999999999	2.9696	6.2322500000000005	770.0	1	0
2.694	5.082879999999999	4.6275	5.3395	770.0	1	0
2.694	5.082879999999999	4.6275	6.2322500000000005	770.0	1	0
2.694	5.082879999999999	2.9696	5.3395	770.0	1	0
2.694	5.082879999999999	2.9696	6.2322500000000005	770.0	1	0
2.694	5.082879999999999	4.6275	5.3395	770.0	1	0
2.694	5.082879999999999	4.6275	6.2322500000000005	770.0	1	0
5.2899	6.99404	5.905666666666666	8.1709	780.0	0	1
5.2899	6.99404	5.905666666666666	6.1935	780.0	0	1
5.2899	6.99404	2.926833333333333	8.1709	780.0	0	1
5.2899	6.99404	2.926833333333333	6.1935	780.0	0	1
5.2899	6.99404	5.905666666666666	8.1709	780.0	0	1
5.2899	6.99404	5.905666666666666	6.1935	780.0	0	1
5.2899	6.99404	2.926833333333333	8.1709	780.0	0	1
5.2899	6.99404	2.926833333333333	6.1935	780.0	0	1
5.2899	5.66176	5.905666666666666	8.1709	780.0	0	1
5.2899	5.66176	5.905666666666666	6.1935	780.0	0	1
5.2899	5.66176	2.926833333333333	8.1709	780.0	0	1
5.2899	5.66176	2.926833333333333	6.1935	780.0	0	1
5.2899	5.66176	5.905666666666666	8.1709	780.0	0	1
5.2899	5.66176	5.905666666666666	6.1935	780.0	0	1
5.2899	5.66176	2.926833333333333	8.1709	780.0	0	1
5.2899	5.66176	2.926833333333333	6.1935	780.0	0	1
5.2899	6.99404	5.905666666666666	8.1709	780.0	0	1
5.2899	6.99404	5.905666666666666	6.1935	780.0	0	1
5.2899	6.99404	2.926833333333333	8.1709	780.0	0	1
5.2899	6.99404	2.926833333333333	6.1935	780.0	0	1
5.2899	6.99404	5.905666666666666	8.1709	780.0	0	1
5.2899	6.99404	5.905666666666666	6.1935	780.0	0	1
5.2899	6.99404	2.926833333333333	8.1709	780.0	0	1
5.2899	6.99404	2.926833333333333	6.1935	780.0	0	1
5.2899	5.66176	5.905666666666666	8.1709	780.0	0	1
5.2899	5.66176	5.905666666666666	6.1935	780.0	0	1
5.2899	5.66176	2.926833333333333	8.1709	780.0	0	1
5.2899	5.66176	2.926833333333333	6.1935	780.0	0	1
5.2899	5.66176	5.905666666666666	8.1709	780.0	0	1
5.2899	5.66176	5.905666666666666	6.1935	780.0	0	1
5.2899	5.66176	2.926833333333333	8.1709	780.0	0	1
5.2899	5.66176	2.926833333333333	6.1935	780.0	0	1
5.9421	7.55536	5.894566666666667	9.2074	784.0	0	1
2.4582	3.89942	3.4815666666666663	4.6861999999999995	799.0	0	0
4.2049	4.950699999999999	4.8458	5.00075	802.0	1	0
3.2635	3.9410799999999995	2.9673	3.7074499999999997	810.0	0	0
5.2282	6.849080000000001	6.608033333333334	7.7288499999999996	816.0	0	1
3.6069	5.41754	4.1434	6.9439	819.0	0	1
3.3141	4.10566	3.608833333333333	3.90465	827.0	1	0
3.3141	4.10566	3.608833333333333	4.8291	827.0	1	0
3.3141	4.10566	3.616533333333333	3.90465	827.0	1	0
3.3141	4.10566	3.616533333333333	4.8291	827.0	1	0
3.3141	4.10566	3.608833333333333	3.90465	827.0	1	0
3.3141	4.10566	3.608833333333333	4.8291	827.0	1	0
3.3141	4.10566	3.616533333333333	3.90465	827.0	1	0
3.3141	4.10566	3.616533333333333	4.8291	827.0	1	0
3.3141	4.57044	3.608833333333333	3.90465	827.0	1	0
3.3141	4.57044	3.608833333333333	4.8291	827.0	1	0
3.3141	4.57044	3.616533333333333	3.90465	827.0	1	0
3.3141	4.57044	3.616533333333333	4.8291	827.0	1	0
3.3141	4.57044	3.608833333333333	3.90465	827.0	1	0
3.3141	4.57044	3.608833333333333	4.8291	827.0	1	0
3.3141	4.57044	3.616533333333333	3.90465	827.0	1	0
3.3141	4.57044	3.616533333333333	4.8291	827.0	1	0
3.3141	4.10566	3.608833333333333	3.90465	827.0	1	0
3.3141	4.10566	3.608833333333333	4.8291	827.0	1	0
3.3141	4.10566	3.616533333333333	3.90465	827.0	1	0
3.3141	4.10566	3.616533333333333	4.8291	827.0	1	0
3.3141	4.10566	3.608833333333333	3.90465	827.0	1	0
3.3141	4.10566	3.608833333333333	4.8291	827.0	1	0
3.3141	4.10566	3.616533333333333	3.90465	827.0	1	0
3.3141	4.10566	3.616533333333333	4.8291	827.0	1	0
3.3141	4.57044	3.608833333333333	3.90465	827.0	1	0
3.3141	4.57044	3.608833333333333	4.8291	827.0	1	0
3.3141	4.57044	3.616533333333333	3.90465	827.0	1	0
3.3141	4.57044	3.616533333333333	4.8291	827.0	1	0
3.3141	4.57044	3.608833333333333	3.90465	827.0	1	0
3.3141	4.57044	3.608833333333333	4.8291	827.0	1	0
3.3141	4.57044	3.616533333333333	3.90465	827.0	1	0
3.3141	4.57044	3.616533333333333	4.8291	827.0	1	0
3.6192	4.79458	4.656533333333333	3.7412	829.0	0	0
0.0	6.40778	3.9772666666666665	4.3109	848.0	0	0
0.0	6.40778	3.9772666666666665	3.4642999999999997	848.0	0	0
0.0	6.40778	4.432933333333334	4.3109	848.0	0	0
0.0	6.40778	4.432933333333334	3.4642999999999997	848.0	0	0
0.0	6.40778	3.9772666666666665	4.3109	848.0	0	0
0.0	6.40778	3.9772666666666665	3.4642999999999997	848.0	0	0
0.0	6.40778	4.432933333333334	4.3109	848.0	0	0
0.0	6.40778	4.432933333333334	3.4642999999999997	848.0	0	0
0.0	4.09336	3.9772666666666665	4.3109	848.0	0	0
0.0	4.09336	3.9772666666666665	3.4642999999999997	848.0	0	0
0.0	4.09336	4.432933333333334	4.3109	848.0	0	0
0.0	4.09336	4.432933333333334	3.4642999999999997	848.0	0	0
0.0	4.09336	3.9772666666666665	4.3109	848.0	0	0
0.0	4.09336	3.9772666666666665	3.4642999999999997	848.0	0	0
0.0	4.09336	4.432933333333334	4.3109	848.0	0	0
0.0	4.09336	4.432933333333334	3.4642999999999997	848.0	0	0
0.0	6.40778	3.9772666666666665	4.3109	848.0	0	0
0.0	6.40778	3.9772666666666665	3.4642999999999997	848.0	0	0
0.0	6.40778	4.432933333333334	4.3109	848.0	0	0
0.0	6.40778	4.432933333333334	3.4642999999999997	848.0	0	0
0.0	6.40778	3.9772666666666665	4.3109	848.0	0	0
0.0	6.40778	3.9772666666666665	3.4642999999999997	848.0	0	0
0.0	6.40778	4.432933333333334	4.3109	848.0	0	0
0.0	6.40778	4.432933333333334	3.4642999999999997	848.0	0	0
0.0	4.09336	3.9772666666666665	4.3109	848.0	0	0
0.0	4.09336	3.9772666666666665	3.4642999999999997	848.0	0	0
0.0	4.09336	4.432933333333334	4.3109	848.0	0	0
0.0	4.09336	4.432933333333334	3.4642999999999997	848.0	0	0
0.0	4.09336	3.9772666666666665	4.3109	848.0	0	0
0.0	4.09336	3.9772666666666665	3.4642999999999997	848.0	0	0
0.0	4.09336	4.432933333333334	4.3109	848.0	0	0
0.0	4.09336	4.432933333333334	3.4642999999999997	848.0	0	0
2.9811	4.44484	3.3437333333333332	5.1186	848.0	0	0
1.242	3.47278	2.705766666666667	3.48595	848.0	1	0
6.6994	8.11768	7.431566666666666	8.29315	849.0	0	1
8.3432	9.012519999999999	8.030633333333332	10.1684	854.0	0	1
4.6606	5.6864799999999995	5.762	6.17465	860.0	0	1
6.158	7.20714	7.5555666666666665	5.5153	879.0	0	1
5.9351	8.7987	5.208200000000001	9.700099999999999	898.0	0	1
4.2709	4.53502	4.303566666666666	2.7885999999999997	898.0	0	0
0.575	4.10482	2.0280333333333336	2.7805	899.0	1	0
6.3409	8.29268	7.853366666666666	9.1905	906.0	0	1
2.1435	3.97904	2.4137333333333335	3.8652999999999995	910.0	0	0
2.9	5.129600000000001	4.3172	4.32135	917.0	0	0
4.1251	4.07716	3.8470666666666666	3.83745	925.0	0	0
4.5855	5.125719999999999	5.820366666666668	4.69925	928.0	0	1
4.0127	5.053800000000001	3.8300666666666667	6.38665	931.0	1	1
0.0	2.27442	3.0732999999999997	3.61495	942.0	0	0
4.8078	7.7878	5.833466666666666	8.558	951.0	0	1
3.6364	5.7506	5.083266666666667	6.85685	989.0	0	1
2.1329	5.03124	2.8026	5.943300000000001	1005.0	1	0
2.1329	5.03124	2.8026	4.7013	1005.0	1	0
2.1329	5.03124	3.122633333333333	5.943300000000001	1005.0	1	0
2.1329	5.03124	3.122633333333333	4.7013	1005.0	1	0
2.1329	5.03124	2.8026	5.943300000000001	1005.0	1	0
2.1329	5.03124	2.8026	4.7013	1005.0	1	0
2.1329	5.03124	3.122633333333333	5.943300000000001	1005.0	1	0
2.1329	5.03124	3.122633333333333	4.7013	1005.0	1	0
2.1329	4.7891200000000005	2.8026	5.943300000000001	1005.0	1	0
2.1329	4.7891200000000005	2.8026	4.7013	1005.0	1	0
2.1329	4.7891200000000005	3.122633333333333	5.943300000000001	1005.0	1	0
2.1329	4.7891200000000005	3.122633333333333	4.7013	1005.0	1	0
2.1329	4.7891200000000005	2.8026	5.943300000000001	1005.0	1	0
2.1329	4.7891200000000005	2.8026	4.7013	1005.0	1	0
2.1329	4.7891200000000005	3.122633333333333	5.943300000000001	1005.0	1	0
2.1329	4.7891200000000005	3.122633333333333	4.7013	1005.0	1	0
2.1329	5.03124	2.8026	5.943300000000001	1005.0	1	0
2.1329	5.03124	2.8026	4.7013	1005.0	1	0
2.1329	5.03124	3.122633333333333	5.943300000000001	1005.0	1	0
2.1329	5.03124	3.122633333333333	4.7013	1005.0	1	0
2.1329	5.03124	2.8026	5.943300000000001	1005.0	1	0
2.1329	5.03124	2.8026	4.7013	1005.0	1	0
2.1329	5.03124	3.122633333333333	5.943300000000001	1005.0	1	0
2.1329	5.03124	3.122633333333333	4.7013	1005.0	1	0
2.1329	4.7891200000000005	2.8026	5.943300000000001	1005.0	1	0
2.1329	4.7891200000000005	2.8026	4.7013	1005.0	1	0
2.1329	4.7891200000000005	3.122633333333333	5.943300000000001	1005.0	1	0
2.1329	4.7891200000000005	3.122633333333333	4.7013	1005.0	1	0
2.1329	4.7891200000000005	2.8026	5.943300000000001	1005.0	1	0
2.1329	4.7891200000000005	2.8026	4.7013	1005.0	1	0
2.1329	4.7891200000000005	3.122633333333333	5.943300000000001	1005.0	1	0
2.1329	4.7891200000000005	3.122633333333333	4.7013	1005.0	1	0
3.6512	5.254759999999999	5.8501	3.78165	1008.0	0	0
5.8858	8.413419999999999	6.605066666666666	9.1042	1030.0	0	1
4.5251	5.607940000000001	4.9975000000000005	5.69375	1049.0	0	1
2.4108	4.591	3.2103333333333333	4.2524500000000005	1066.0	0	0
5.8539	7.067359999999999	5.996333333333333	7.86365	1067.0	0	1
4.3124	5.89854	3.8562	7.8587	1085.0	0	1
5.4633	7.47566	5.424566666666666	9.1928	1085.0	0	1
6.2934	8.4567	6.334366666666667	9.268	1098.0	0	1
3.5985	5.03648	5.1864333333333335	4.1883	1115.0	0	0
1.4972	2.9738599999999997	3.235066666666667	4.0485	1145.0	0	0
6.6564	7.12606	6.572666666666666	8.1659	1149.0	1	1
6.6564	7.12606	6.572666666666666	8.6977	1149.0	1	1
6.6564	7.12606	6.678100000000001	8.1659	1149.0	1	1
6.6564	7.12606	6.678100000000001	8.6977	1149.0	1	1
6.6564	7.12606	6.572666666666666	8.1659	1149.0	1	1
6.6564	7.12606	6.572666666666666	8.6977	1149.0	1	1
6.6564	7.12606	6.678100000000001	8.1659	1149.0	1	1
6.6564	7.12606	6.678100000000001	8.6977	1149.0	1	1
6.6564	7.6238	6.572666666666666	8.1659	1149.0	1	1
6.6564	7.6238	6.572666666666666	8.6977	1149.0	1	1
6.6564	7.6238	6.678100000000001	8.1659	1149.0	1	1
6.6564	7.6238	6.678100000000001	8.6977	1149.0	1	1
6.6564	7.6238	6.572666666666666	8.1659	1149.0	1	1
6.6564	7.6238	6.572666666666666	8.6977	1149.0	1	1
6.6564	7.6238	6.678100000000001	8.1659	1149.0	1	1
6.6564	7.6238	6.678100000000001	8.6977	1149.0	1	1
6.6564	7.12606	6.572666666666666	8.1659	1149.0	1	1
6.6564	7.12606	6.572666666666666	8.6977	1149.0	1	1
6.6564	7.12606	6.678100000000001	8.1659	1149.0	1	1
6.6564	7.12606	6.678100000000001	8.6977	1149.0	1	1
6.6564	7.12606	6.572666666666666	8.1659	1149.0	1	1
6.6564	7.12606	6.572666666666666	8.6977	1149.0	1	1
6.6564	7.12606	6.678100000000001	8.1659	1149.0	1	1
6.6564	7.12606	6.678100000000001	8.6977	1149.0	1	1
6.6564	7.6238	6.572666666666666	8.1659	1149.0	1	1
6.6564	7.6238	6.572666666666666	8.6977	1149.0	1	1
6.6564	7.6238	6.678100000000001	8.1659	1149.0	1	1
6.6564	7.6238	6.678100000000001	8.6977	1149.0	1	1
6.6564	7.6238	6.572666666666666	8.1659	1149.0	1	1
6.6564	7.6238	6.572666666666666	8.6977	1149.0	1	1
6.6564	7.6238	6.678100000000001	8.1659	1149.0	1	1
6.6564	7.6238	6.678100000000001	8.6977	1149.0	1	1
3.2595	3.9416200000000003	2.6309	4.3903	1168.0	0	0
1.2827	3.2014399999999994	5.320433333333333	3.8437	1210.0	1	0
2.927	4.90154	4.409533333333333	5.30475	1219.0	0	0
5.49	6.332439999999999	4.571233333333333	6.8372	1229.0	1	1
3.5867	5.46336	3.4316999999999998	6.28915	1231.0	0	0
4.7359	5.89164	3.9933666666666667	6.8177	1233.0	0	1
0.0	2.4530000000000003	3.652066666666667	2.4606	1241.0	0	0
5.9495	7.8655	6.3578	8.4713	1242.0	0	1
4.8754	5.83682	6.0106	4.1772	1271.0	1	1
3.8964	5.11132	3.9404333333333335	5.73485	1295.0	0	0
4.3213	5.59918	4.0278	6.06175	1302.0	0	1
2.9098	3.68938	4.0791	2.7479	1339.0	0	0
1.603	4.5039	3.7204333333333337	3.9781999999999997	1345.0	0	0
5.6558	8.3138	5.644633333333334	9.23375	1351.0	0	1
5.6558	8.3138	5.644633333333334	6.155849999999999	1351.0	0	1
5.6558	8.3138	4.294766666666667	9.23375	1351.0	0	1
5.6558	8.3138	4.294766666666667	6.155849999999999	1351.0	0	1
5.6558	8.3138	5.644633333333334	9.23375	1351.0	0	1
5.6558	8.3138	5.644633333333334	6.155849999999999	1351.0	0	1
5.6558	8.3138	4.294766666666667	9.23375	1351.0	0	1
5.6558	8.3138	4.294766666666667	6.155849999999999	1351.0	0	1
5.6558	5.64196	5.644633333333334	9.23375	1351.0	0	1
5.6558	5.64196	5.644633333333334	6.155849999999999	1351.0	0	1
5.6558	5.64196	4.294766666666667	9.23375	1351.0	0	1
5.6558	5.64196	4.294766666666667	6.155849999999999	1351.0	0	1
5.6558	5.64196	5.644633333333334	9.23375	1351.0	0	1
5.6558	5.64196	5.644633333333334	6.155849999999999	1351.0	0	1
5.6558	5.64196	4.294766666666667	9.23375	1351.0	0	1
5.6558	5.64196	4.294766666666667	6.155849999999999	1351.0	0	1
5.6558	8.3138	5.644633333333334	9.23375	1351.0	0	1
5.6558	8.3138	5.644633333333334	6.155849999999999	1351.0	0	1
5.6558	8.3138	4.294766666666667	9.23375	1351.0	0	1
5.6558	8.3138	4.294766666666667	6.155849999999999	1351.0	0	1
5.6558	8.3138	5.644633333333334	9.23375	1351.0	0	1
5.6558	8.3138	5.644633333333334	6.155849999999999	1351.0	0	1
5.6558	8.3138	4.294766666666667	9.23375	1351.0	0	1
5.6558	8.3138	4.294766666666667	6.155849999999999	1351.0	0	1
5.6558	5.64196	5.644633333333334	9.23375	1351.0	0	1
5.6558	5.64196	5.644633333333334	6.155849999999999	1351.0	0	1
5.6558	5.64196	4.294766666666667	9.23375	1351.0	0	1
5.6558	5.64196	4.294766666666667	6.155849999999999	1351.0	0	1
5.6558	5.64196	5.644633333333334	9.23375	1351.0	0	1
5.6558	5.64196	5.644633333333334	6.155849999999999	1351.0	0	1
5.6558	5.64196	4.294766666666667	9.23375	1351.0	0	1
5.6558	5.64196	4.294766666666667	6.155849999999999	1351.0	0	1
4.967	6.28324	4.642166666666667	6.49295	1372.0	1	1
4.967	6.28324	4.642166666666667	6.4599	1372.0	1	1
4.967	6.28324	5.890233333333334	6.49295	1372.0	1	1
4.967	6.28324	5.890233333333334	6.4599	1372.0	1	1
4.967	6.28324	4.642166666666667	6.49295	1372.0	1	1
4.967	6.28324	4.642166666666667	6.4599	1372.0	1	1
4.967	6.28324	5.890233333333334	6.49295	1372.0	1	1
4.967	6.28324	5.890233333333334	6.4599	1372.0	1	1
4.967	6.4020399999999995	4.642166666666667	6.49295	1372.0	1	1
4.967	6.4020399999999995	4.642166666666667	6.4599	1372.0	1	1
4.967	6.4020399999999995	5.890233333333334	6.49295	1372.0	1	1
4.967	6.4020399999999995	5.890233333333334	6.4599	1372.0	1	1
4.967	6.4020399999999995	4.642166666666667	6.49295	1372.0	1	1
4.967	6.4020399999999995	4.642166666666667	6.4599	1372.0	1	1
4.967	6.4020399999999995	5.890233333333334	6.49295	1372.0	1	1
4.967	6.4020399999999995	5.890233333333334	6.4599	1372.0	1	1
4.967	6.28324	4.642166666666667	6.49295	1372.0	1	1
4.967	6.28324	4.642166666666667	6.4599	1372.0	1	1
4.967	6.28324	5.890233333333334	6.49295	1372.0	1	1
4.967	6.28324	5.890233333333334	6.4599	1372.0	1	1
4.967	6.28324	4.642166666666667	6.49295	1372.0	1	1
4.967	6.28324	4.642166666666667	6.4599	1372.0	1	1
4.967	6.28324	5.890233333333334	6.49295	1372.0	1	1
4.967	6.28324	5.890233333333334	6.4599	1372.0	1	1
4.967	6.4020399999999995	4.642166666666667	6.49295	1372.0	1	1
4.967	6.4020399999999995	4.642166666666667	6.4599	1372.0	1	1
4.967	6.4020399999999995	5.890233333333334	6.49295	1372.0	1	1
4.967	6.4020399999999995	5.890233333333334	6.4599	1372.0	1	1
4.967	6.4020399999999995	4.642166666666667	6.49295	1372.0	1	1
4.967	6.4020399999999995	4.642166666666667	6.4599	1372.0	1	1
4.967	6.4020399999999995	5.890233333333334	6.49295	1372.0	1	1
4.967	6.4020399999999995	5.890233333333334	6.4599	1372.0	1	1
3.5259	4.119120000000001	4.1617999999999995	4.85845	1386.0	1	0
4.642	5.77496	5.126200000000001	5.84725	1397.0	1	1
2.9989	5.02154	3.2618999999999994	4.20005	1424.0	0	0
2.9149	4.03506	2.4077333333333333	5.34595	1450.0	0	0
2.536	4.89504	3.5284666666666666	6.6852	1452.0	0	0
7.0161	7.8914599999999995	7.351866666666667	7.824199999999999	1490.0	1	1
3.4253	4.02754	3.463266666666667	5.0108999999999995	1495.0	0	0
3.4253	4.02754	3.463266666666667	6.5396	1495.0	0	0
3.4253	4.02754	4.273733333333333	5.0108999999999995	1495.0	0	0
3.4253	4.02754	4.273733333333333	6.5396	1495.0	0	0
3.4253	4.02754	3.463266666666667	5.0108999999999995	1495.0	0	0
3.4253	4.02754	3.463266666666667	6.5396	1495.0	0	0
3.4253	4.02754	4.273733333333333	5.0108999999999995	1495.0	0	0
3.4253	4.02754	4.273733333333333	6.5396	1495.0	0	0
3.4253	5.50238	3.463266666666667	5.0108999999999995	1495.0	0	0
3.4253	5.50238	3.463266666666667	6.5396	1495.0	0	0
3.4253	5.50238	4.273733333333333	5.0108999999999995	1495.0	0	0
3.4253	5.50238	4.273733333333333	6.5396	1495.0	0	1
3.4253	5.50238	3.463266666666667	5.0108999999999995	1495.0	0	0
3.4253	5.50238	3.463266666666667	6.5396	1495.0	0	0
3.4253	5.50238	4.273733333333333	5.0108999999999995	1495.0	0	0
3.4253	5.50238	4.273733333333333	6.5396	1495.0	0	1
3.4253	4.02754	3.463266666666667	5.0108999999999995	1495.0	0	0
3.4253	4.02754	3.463266666666667	6.5396	1495.0	0	0
3.4253	4.02754	4.273733333333333	5.0108999999999995	1495.0	0	0
3.4253	4.02754	4.273733333333333	6.5396	1495.0	0	0
3.4253	4.02754	3.463266666666667	5.0108999999999995	1495.0	0	0
3.4253	4.02754	3.463266666666667	6.5396	1495.0	0	0
3.4253	4.02754	4.273733333333333	5.0108999999999995	1495.0	0	0
3.4253	4.02754	4.273733333333333	6.5396	1495.0	0	0
3.4253	5.50238	3.463266666666667	5.0108999999999995	1495.0	0	0
3.4253	5.50238	3.463266666666667	6.5396	1495.0	0	0
3.4253	5.50238	4.273733333333333	5.0108999999999995	1495.0	0	0
3.4253	5.50238	4.273733333333333	6.5396	1495.0	0	1
3.4253	5.50238	3.463266666666667	5.0108999999999995	1495.0	0	0
3.4253	5.50238	3.463266666666667	6.5396	1495.0	0	0
3.4253	5.50238	4.273733333333333	5.0108999999999995	1495.0	0	0
3.4253	5.50238	4.273733333333333	6.5396	1495.0	0	1
6.0874	7.4652	5.2226	7.763199999999999	1516.0	0	1
1.3757	3.14198	4.478933333333333	2.7626	1531.0	0	0
3.5278	5.11536	3.618766666666667	5.1249	1531.0	0	0
0.901	4.602320000000001	2.4252333333333334	4.81475	1553.0	0	0
5.3323	6.776619999999999	5.8851	8.1168	1560.0	1	1
5.3323	6.776619999999999	5.8851	3.6909	1560.0	1	1
5.3323	6.776619999999999	2.6089333333333333	8.1168	1560.0	1	1
5.3323	6.776619999999999	2.6089333333333333	3.6909	1560.0	1	0
5.3323	6.776619999999999	5.8851	8.1168	1560.0	1	1
5.3323	6.776619999999999	5.8851	3.6909	1560.0	1	1
5.3323	6.776619999999999	2.6089333333333333	8.1168	1560.0	1	1
5.3323	6.776619999999999	2.6089333333333333	3.6909	1560.0	1	0
5.3323	3.16314	5.8851	8.1168	1560.0	1	1
5.3323	3.16314	5.8851	3.6909	1560.0	1	0
5.3323	3.16314	2.6089333333333333	8.1168	1560.0	1	0
5.3323	3.16314	2.6089333333333333	3.6909	1560.0	1	0
5.3323	3.16314	5.8851	8.1168	1560.0	1	1
5.3323	3.16314	5.8851	3.6909	1560.0	1	0
5.3323	3.16314	2.6089333333333333	8.1168	1560.0	1	0
5.3323	3.16314	2.6089333333333333	3.6909	1560.0	1	0
5.3323	6.776619999999999	5.8851	8.1168	1560.0	1	1
5.3323	6.776619999999999	5.8851	3.6909	1560.0	1	1
5.3323	6.776619999999999	2.6089333333333333	8.1168	1560.0	1	1
5.3323	6.776619999999999	2.6089333333333333	3.6909	1560.0	1	0
5.3323	6.776619999999999	5.8851	8.1168	1560.0	1	1
5.3323	6.776619999999999	5.8851	3.6909	1560.0	1	1
5.3323	6.776619999999999	2.6089333333333333	8.1168	1560.0	1	1
5.3323	6.776619999999999	2.6089333333333333	3.6909	1560.0	1	0
5.3323	3.16314	5.8851	8.1168	1560.0	1	1
5.3323	3.16314	5.8851	3.6909	1560.0	1	0
5.3323	3.16314	2.6089333333333333	8.1168	1560.0	1	0
5.3323	3.16314	2.6089333333333333	3.6909	1560.0	1	0
5.3323	3.16314	5.8851	8.1168	1560.0	1	1
5.3323	3.16314	5.8851	3.6909	1560.0	1	0
5.3323	3.16314	2.6089333333333333	8.1168	1560.0	1	0
5.3323	3.16314	2.6089333333333333	3.6909	1560.0	1	0
3.3118	5.40766	4.353566666666667	6.5604	1562.0	0	1
2.7578	4.779459999999999	2.8287	5.6844	1567.0	0	0
6.2725	8.202639999999999	5.8471	8.9604	1618.0	0	1
4.1061	5.86492	4.512166666666666	7.0171	1622.0	1	1
4.1061	5.86492	4.512166666666666	5.51905	1622.0	1	1
4.1061	5.86492	3.761066666666667	7.0171	1622.0	1	1
4.1061	5.86492	3.761066666666667	5.51905	1622.0	1	1
4.1061	5.86492	4.512166666666666	7.0171	1622.0	1	1
4.1061	5.86492	4.512166666666666	5.51905	1622.0	1	1
4.1061	5.86492	3.761066666666667	7.0171	1622.0	1	1
4.1061	5.86492	3.761066666666667	5.51905	1622.0	1	1
4.1061	4.8822600000000005	4.512166666666666	7.0171	1622.0	1	1
4.1061	4.8822600000000005	4.512166666666666	5.51905	1622.0	1	0
4.1061	4.8822600000000005	3.761066666666667	7.0171	1622.0	1	1
4.1061	4.8822600000000005	3.761066666666667	5.51905	1622.0	1	0
4.1061	4.8822600000000005	4.512166666666666	7.0171	1622.0	1	1
4.1061	4.8822600000000005	4.512166666666666	5.51905	1622.0	1	0
4.1061	4.8822600000000005	3.761066666666667	7.0171	1622.0	1	1
4.1061	4.8822600000000005	3.761066666666667	5.51905	1622.0	1	0
4.1061	5.86492	4.512166666666666	7.0171	1622.0	1	1
4.1061	5.86492	4.512166666666666	5.51905	1622.0	1	1
4.1061	5.86492	3.761066666666667	7.0171	1622.0	1	1
4.1061	5.86492	3.761066666666667	5.51905	1622.0	1	1
4.1061	5.86492	4.512166666666666	7.0171	1622.0	1	1
4.1061	5.86492	4.512166666666666	5.51905	1622.0	1	1
4.1061	5.86492	3.761066666666667	7.0171	1622.0	1	1
4.1061	5.86492	3.761066666666667	5.51905	1622.0	1	1
4.1061	4.8822600000000005	4.512166666666666	7.0171	1622.0	1	1
4.1061	4.8822600000000005	4.512166666666666	5.51905	1622.0	1	0
4.1061	4.8822600000000005	3.761066666666667	7.0171	1622.0	1	1
4.1061	4.8822600000000005	3.761066666666667	5.51905	1622.0	1	0
4.1061	4.8822600000000005	4.512166666666666	7.0171	1622.0	1	1
4.1061	4.8822600000000005	4.512166666666666	5.51905	1622.0	1	0
4.1061	4.8822600000000005	3.761066666666667	7.0171	1622.0	1	1
4.1061	4.8822600000000005	3.761066666666667	5.51905	1622.0	1	0
7.1105	7.9482	6.598966666666667	9.0644	1624.0	1	1
1.419	2.60704	2.484	3.54035	1633.0	0	0
0.6558	3.54352	4.819166666666667	3.4442000000000004	1636.0	0	0
7.2415	9.4515	7.3426	10.8088	1685.0	1	1
2.9423	4.966880000000001	2.0697	5.9122	1694.0	1	0
2.9423	4.966880000000001	2.0697	4.7082	1694.0	1	0
2.9423	4.966880000000001	3.0209333333333332	5.9122	1694.0	1	0
2.9423	4.966880000000001	3.0209333333333332	4.7082	1694.0	1	0
2.9423	4.966880000000001	2.0697	5.9122	1694.0	1	0
2.9423	4.966880000000001	2.0697	4.7082	1694.0	1	0
2.9423	4.966880000000001	3.0209333333333332	5.9122	1694.0	1	0
2.9423	4.966880000000001	3.0209333333333332	4.7082	1694.0	1	0
2.9423	4.47644	2.0697	5.9122	1694.0	1	0
2.9423	4.47644	2.0697	4.7082	1694.0	1	0
2.9423	4.47644	3.0209333333333332	5.9122	1694.0	1	0
2.9423	4.47644	3.0209333333333332	4.7082	1694.0	1	0
2.9423	4.47644	2.0697	5.9122	1694.0	1	0
2.9423	4.47644	2.0697	4.7082	1694.0	1	0
2.9423	4.47644	3.0209333333333332	5.9122	1694.0	1	0
2.9423	4.47644	3.0209333333333332	4.7082	1694.0	1	0
2.9423	4.966880000000001	2.0697	5.9122	1694.0	1	0
2.9423	4.966880000000001	2.0697	4.7082	1694.0	1	0
2.9423	4.966880000000001	3.0209333333333332	5.9122	1694.0	1	0
2.9423	4.966880000000001	3.0209333333333332	4.7082	1694.0	1	0
2.9423	4.966880000000001	2.0697	5.9122	1694.0	1	0
2.9423	4.966880000000001	2.0697	4.7082	1694.0	1	0
2.9423	4.966880000000001	3.0209333333333332	5.9122	1694.0	1	0
2.9423	4.966880000000001	3.0209333333333332	4.7082	1694.0	1	0
2.9423	4.47644	2.0697	5.9122	1694.0	1	0
2.9423	4.47644	2.0697	4.7082	1694.0	1	0
2.9423	4.47644	3.0209333333333332	5.9122	1694.0	1	0
2.9423	4.47644	3.0209333333333332	4.7082	1694.0	1	0
2.9423	4.47644	2.0697	5.9122	1694.0	1	0
2.9423	4.47644	2.0697	4.7082	1694.0	1	0
2.9423	4.47644	3.0209333333333332	5.9122	1694.0	1	0
2.9423	4.47644	3.0209333333333332	4.7082	1694.0	1	0
2.6093	4.566039999999999	3.293066666666667	5.1777999999999995	1711.0	0	0
2.4821	4.389659999999999	3.3104	5.63425	1718.0	0	0
3.6565	5.8075600000000005	4.557366666666667	5.88065	1731.0	0	1
5.1903	7.63356	6.097	7.98945	1779.0	0	1
5.1903	7.63356	6.097	7.98945	1779.0	0	1
5.1903	7.63356	6.097	7.98945	1779.0	0	1
5.1903	7.63356	6.097	7.98945	1779.0	0	1
0.4621	4.1706	5.190033333333333	1.94855	1791.0	1	0
0.0	2.8419800000000004	1.3962	2.4595	1804.0	0	0
3.0764	4.84314	3.3209666666666666	6.1464	1823.0	0	0
6.3758	5.37118	4.631966666666667	6.00425	1852.0	1	1
6.3758	5.37118	4.631966666666667	8.083450000000001	1852.0	1	1
6.3758	5.37118	5.508066666666667	6.00425	1852.0	1	1
6.3758	5.37118	5.508066666666667	8.083450000000001	1852.0	1	1
6.3758	5.37118	4.631966666666667	6.00425	1852.0	1	1
6.3758	5.37118	4.631966666666667	8.083450000000001	1852.0	1	1
6.3758	5.37118	5.508066666666667	6.00425	1852.0	1	1
6.3758	5.37118	5.508066666666667	8.083450000000001	1852.0	1	1
6.3758	6.6928	4.631966666666667	6.00425	1852.0	1	1
6.3758	6.6928	4.631966666666667	8.083450000000001	1852.0	1	1
6.3758	6.6928	5.508066666666667	6.00425	1852.0	1	1
6.3758	6.6928	5.508066666666667	8.083450000000001	1852.0	1	1
6.3758	6.6928	4.631966666666667	6.00425	1852.0	1	1
6.3758	6.6928	4.631966666666667	8.083450000000001	1852.0	1	1
6.3758	6.6928	5.508066666666667	6.00425	1852.0	1	1
6.3758	6.6928	5.508066666666667	8.083450000000001	1852.0	1	1
6.3758	5.37118	4.631966666666667	6.00425	1852.0	1	1
6.3758	5.37118	4.631966666666667	8.083450000000001	1852.0	1	1
6.3758	5.37118	5.508066666666667	6.00425	1852.0	1	1
6.3758	5.37118	5.508066666666667	8.083450000000001	1852.0	1	1
6.3758	5.37118	4.631966666666667	6.00425	1852.0	1	1
6.3758	5.37118	4.631966666666667	8.083450000000001	1852.0	1	1
6.3758	5.37118	5.508066666666667	6.00425	1852.0	1	1
6.3758	5.37118	5.508066666666667	8.083450000000001	1852.0	1	1
6.3758	6.6928	4.631966666666667	6.00425	1852.0	1	1
6.3758	6.6928	4.631966666666667	8.083450000000001	1852.0	1	1
6.3758	6.6928	5.508066666666667	6.00425	1852.0	1	1
6.3758	6.6928	5.508066666666667	8.083450000000001	1852.0	1	1
6.3758	6.6928	4.631966666666667	6.00425	1852.0	1	1
6.3758	6.6928	4.631966666666667	8.083450000000001	1852.0	1	1
6.3758	6.6928	5.508066666666667	6.00425	1852.0	1	1
6.3758	6.6928	5.508066666666667	8.083450000000001	1852.0	1	1
0.0	2.63596	0.8700333333333333	3.5061999999999998	1855.0	0	0
4.4553	5.0487400000000004	3.0093	5.80275	1876.0	0	0
2.5322	4.04822	2.7233666666666667	3.81395	1900.0	0	0
3.4607	4.9410799999999995	3.4879	5.0538	1939.0	0	0
2.0218	3.55824	3.1912	3.83385	1970.0	0	0
0.6776	2.9063600000000003	2.160266666666667	3.09155	1989.0	0	0
3.8146	5.5186	4.533666666666667	5.9056999999999995	2015.0	0	1
2.9728	5.3923000000000005	3.4522999999999997	7.038600000000001	2017.0	0	0
2.9728	5.3923000000000005	3.4522999999999997	6.05415	2017.0	0	0
2.9728	5.3923000000000005	4.9886333333333335	7.038600000000001	2017.0	0	1
2.9728	5.3923000000000005	4.9886333333333335	6.05415	2017.0	0	1
2.9728	5.3923000000000005	3.4522999999999997	7.038600000000001	2017.0	0	0
2.9728	5.3923000000000005	3.4522999999999997	6.05415	2017.0	0	0
2.9728	5.3923000000000005	4.9886333333333335	7.038600000000001	2017.0	0	1
2.9728	5.3923000000000005	4.9886333333333335	6.05415	2017.0	0	1
2.9728	4.79856	3.4522999999999997	7.038600000000001	2017.0	0	0
2.9728	4.79856	3.4522999999999997	6.05415	2017.0	0	0
2.9728	4.79856	4.9886333333333335	7.038600000000001	2017.0	0	1
2.9728	4.79856	4.9886333333333335	6.05415	2017.0	0	0
2.9728	4.79856	3.4522999999999997	7.038600000000001	2017.0	0	0
2.9728	4.79856	3.4522999999999997	6.05415	2017.0	0	0
2.9728	4.79856	4.9886333333333335	7.038600000000001	2017.0	0	1
2.9728	4.79856	4.9886333333333335	6.05415	2017.0	0	0
2.9728	5.3923000000000005	3.4522999999999997	7.038600000000001	2017.0	0	0
2.9728	5.3923000000000005	3.4522999999999997	6.05415	2017.0	0	0
2.9728	5.3923000000000005	4.9886333333333335	7.038600000000001	2017.0	0	1
2.9728	5.3923000000000005	4.9886333333333335	6.05415	2017.0	0	1
2.9728	5.3923000000000005	3.4522999999999997	7.038600000000001	2017.0	0	0
2.9728	5.3923000000000005	3.4522999999999997	6.05415	2017.0	0	0
2.9728	5.3923000000000005	4.9886333333333335	7.038600000000001	2017.0	0	1
2.9728	5.3923000000000005	4.9886333333333335	6.05415	2017.0	0	1
2.9728	4.79856	3.4522999999999997	7.038600000000001	2017.0	0	0
2.9728	4.79856	3.4522999999999997	6.05415	2017.0	0	0
2.9728	4.79856	4.9886333333333335	7.038600000000001	2017.0	0	1
2.9728	4.79856	4.9886333333333335	6.05415	2017.0	0	0
2.9728	4.79856	3.4522999999999997	7.038600000000001	2017.0	0	0
2.9728	4.79856	3.4522999999999997	6.05415	2017.0	0	0
2.9728	4.79856	4.9886333333333335	7.038600000000001	2017.0	0	1
2.9728	4.79856	4.9886333333333335	6.05415	2017.0	0	0
2.8007	4.56476	3.840766666666667	5.5796	2028.0	0	0
1.5265	3.10524	1.6079666666666668	2.9863999999999997	2102.0	0	0
1.3516	4.91306	2.068633333333333	5.6167	2131.0	1	0
1.3516	4.91306	2.068633333333333	4.35175	2131.0	1	0
1.3516	4.91306	4.124233333333334	5.6167	2131.0	1	0
1.3516	4.91306	4.124233333333334	4.35175	2131.0	1	0
1.3516	4.91306	2.068633333333333	5.6167	2131.0	1	0
1.3516	4.91306	2.068633333333333	4.35175	2131.0	1	0
1.3516	4.91306	4.124233333333334	5.6167	2131.0	1	0
1.3516	4.91306	4.124233333333334	4.35175	2131.0	1	0
1.3516	3.7531400000000006	2.068633333333333	5.6167	2131.0	1	0
1.3516	3.7531400000000006	2.068633333333333	4.35175	2131.0	1	0
1.3516	3.7531400000000006	4.124233333333334	5.6167	2131.0	1	0
1.3516	3.7531400000000006	4.124233333333334	4.35175	2131.0	1	0
1.3516	3.7531400000000006	2.068633333333333	5.6167	2131.0	1	0
1.3516	3.7531400000000006	2.068633333333333	4.35175	2131.0	1	0
1.3516	3.7531400000000006	4.124233333333334	5.6167	2131.0	1	0
1.3516	3.7531400000000006	4.124233333333334	4.35175	2131.0	1	0
1.3516	4.91306	2.068633333333333	5.6167	2131.0	1	0
1.3516	4.91306	2.068633333333333	4.35175	2131.0	1	0
1.3516	4.91306	4.124233333333334	5.6167	2131.0	1	0
1.3516	4.91306	4.124233333333334	4.35175	2131.0	1	0
1.3516	4.91306	2.068633333333333	5.6167	2131.0	1	0
1.3516	4.91306	2.068633333333333	4.35175	2131.0	1	0
1.3516	4.91306	4.124233333333334	5.6167	2131.0	1	0
1.3516	4.91306	4.124233333333334	4.35175	2131.0	1	0
1.3516	3.7531400000000006	2.068633333333333	5.6167	2131.0	1	0
1.3516	3.7531400000000006	2.068633333333333	4.35175	2131.0	1	0
1.3516	3.7531400000000006	4.124233333333334	5.6167	2131.0	1	0
1.3516	3.7531400000000006	4.124233333333334	4.35175	2131.0	1	0
1.3516	3.7531400000000006	2.068633333333333	5.6167	2131.0	1	0
1.3516	3.7531400000000006	2.068633333333333	4.35175	2131.0	1	0
1.3516	3.7531400000000006	4.124233333333334	5.6167	2131.0	1	0
1.3516	3.7531400000000006	4.124233333333334	4.35175	2131.0	1	0
3.0654	4.20698	5.0546999999999995	4.7004	2184.0	0	0
0.0	2.522	0.7015333333333333	2.2377000000000002	2202.0	0	0
1.7795	4.016800000000001	3.2060999999999997	4.3678	2245.0	0	0
0.0	2.3300799999999997	0.4764	2.6308	2301.0	0	0
0.0	2.3300799999999997	0.4764	5.2988	2301.0	0	0
0.0	2.3300799999999997	2.0157000000000003	2.6308	2301.0	0	0
0.0	2.3300799999999997	2.0157000000000003	5.2988	2301.0	0	0
0.0	2.3300799999999997	0.4764	2.6308	2301.0	0	0
0.0	2.3300799999999997	0.4764	5.2988	2301.0	0	0
0.0	2.3300799999999997	2.0157000000000003	2.6308	2301.0	0	0
0.0	2.3300799999999997	2.0157000000000003	5.2988	2301.0	0	0
0.0	4.02316	0.4764	2.6308	2301.0	0	0
0.0	4.02316	0.4764	5.2988	2301.0	0	0
0.0	4.02316	2.0157000000000003	2.6308	2301.0	0	0
0.0	4.02316	2.0157000000000003	5.2988	2301.0	0	0
0.0	4.02316	0.4764	2.6308	2301.0	0	0
0.0	4.02316	0.4764	5.2988	2301.0	0	0
0.0	4.02316	2.0157000000000003	2.6308	2301.0	0	0
0.0	4.02316	2.0157000000000003	5.2988	2301.0	0	0
0.0	2.3300799999999997	0.4764	2.6308	2301.0	0	0
0.0	2.3300799999999997	0.4764	5.2988	2301.0	0	0
0.0	2.3300799999999997	2.0157000000000003	2.6308	2301.0	0	0
0.0	2.3300799999999997	2.0157000000000003	5.2988	2301.0	0	0
0.0	2.3300799999999997	0.4764	2.6308	2301.0	0	0
0.0	2.3300799999999997	0.4764	5.2988	2301.0	0	0
0.0	2.3300799999999997	2.0157000000000003	2.6308	2301.0	0	0
0.0	2.3300799999999997	2.0157000000000003	5.2988	2301.0	0	0
0.0	4.02316	0.4764	2.6308	2301.0	0	0
0.0	4.02316	0.4764	5.2988	2301.0	0	0
0.0	4.02316	2.0157000000000003	2.6308	2301.0	0	0
0.0	4.02316	2.0157000000000003	5.2988	2301.0	0	0
0.0	4.02316	0.4764	2.6308	2301.0	0	0
0.0	4.02316	0.4764	5.2988	2301.0	0	0
0.0	4.02316	2.0157000000000003	2.6308	2301.0	0	0
0.0	4.02316	2.0157000000000003	5.2988	2301.0	0	0
4.3205	5.21054	4.383833333333333	6.4961	2301.0	0	1
4.3205	5.21054	4.383833333333333	6.4961	2301.0	0	1
4.3205	5.21054	4.383833333333333	6.4961	2301.0	0	1
4.3205	5.21054	4.383833333333333	6.4961	2301.0	0	1
4.467	5.4687	5.502366666666667	5.1663499999999996	2317.0	0	1
5.0721	7.60684	5.466166666666666	9.182549999999999	2324.0	0	1
3.415	4.40862	4.493833333333334	5.0651	2398.0	0	0
3.9849	4.75682	4.8318666666666665	4.80485	2412.0	0	0
3.9849	4.75682	4.8318666666666665	4.7909	2412.0	0	0
3.9849	4.75682	4.404333333333334	4.80485	2412.0	0	0
3.9849	4.75682	4.404333333333334	4.7909	2412.0	0	0
3.9849	4.75682	4.8318666666666665	4.80485	2412.0	0	0
3.9849	4.75682	4.8318666666666665	4.7909	2412.0	0	0
3.9849	4.75682	4.404333333333334	4.80485	2412.0	0	0
3.9849	4.75682	4.404333333333334	4.7909	2412.0	0	0
3.9849	4.86404	4.8318666666666665	4.80485	2412.0	0	0
3.9849	4.86404	4.8318666666666665	4.7909	2412.0	0	0
3.9849	4.86404	4.404333333333334	4.80485	2412.0	0	0
3.9849	4.86404	4.404333333333334	4.7909	2412.0	0	0
3.9849	4.86404	4.8318666666666665	4.80485	2412.0	0	0
3.9849	4.86404	4.8318666666666665	4.7909	2412.0	0	0
3.9849	4.86404	4.404333333333334	4.80485	2412.0	0	0
3.9849	4.86404	4.404333333333334	4.7909	2412.0	0	0
3.9849	4.75682	4.8318666666666665	4.80485	2412.0	0	0
3.9849	4.75682	4.8318666666666665	4.7909	2412.0	0	0
3.9849	4.75682	4.404333333333334	4.80485	2412.0	0	0
3.9849	4.75682	4.404333333333334	4.7909	2412.0	0	0
3.9849	4.75682	4.8318666666666665	4.80485	2412.0	0	0
3.9849	4.75682	4.8318666666666665	4.7909	2412.0	0	0
3.9849	4.75682	4.404333333333334	4.80485	2412.0	0	0
3.9849	4.75682	4.404333333333334	4.7909	2412.0	0	0
3.9849	4.86404	4.8318666666666665	4.80485	2412.0	0	0
3.9849	4.86404	4.8318666666666665	4.7909	2412.0	0	0
3.9849	4.86404	4.404333333333334	4.80485	2412.0	0	0
3.9849	4.86404	4.404333333333334	4.7909	2412.0	0	0
3.9849	4.86404	4.8318666666666665	4.80485	2412.0	0	0
3.9849	4.86404	4.8318666666666665	4.7909	2412.0	0	0
3.9849	4.86404	4.404333333333334	4.80485	2412.0	0	0
3.9849	4.86404	4.404333333333334	4.7909	2412.0	0	0
4.57	6.1039	5.4439	7.28055	2415.0	0	1
4.6872	5.6788	4.975633333333334	6.4603	2425.0	0	1
4.6872	5.6788	4.975633333333334	4.9897	2425.0	0	1
4.6872	5.6788	2.9484999999999997	6.4603	2425.0	0	1
4.6872	5.6788	2.9484999999999997	4.9897	2425.0	0	0
4.6872	5.6788	4.975633333333334	6.4603	2425.0	0	1
4.6872	5.6788	4.975633333333334	4.9897	2425.0	0	1
4.6872	5.6788	2.9484999999999997	6.4603	2425.0	0	1
4.6872	5.6788	2.9484999999999997	4.9897	2425.0	0	0
4.6872	4.50364	4.975633333333334	6.4603	2425.0	0	1
4.6872	4.50364	4.975633333333334	4.9897	2425.0	0	0
4.6872	4.50364	2.9484999999999997	6.4603	2425.0	0	0
4.6872	4.50364	2.9484999999999997	4.9897	2425.0	0	0
4.6872	4.50364	4.975633333333334	6.4603	2425.0	0	1
4.6872	4.50364	4.975633333333334	4.9897	2425.0	0	0
4.6872	4.50364	2.9484999999999997	6.4603	2425.0	0	0
4.6872	4.50364	2.9484999999999997	4.9897	2425.0	0	0
4.6872	5.6788	4.975633333333334	6.4603	2425.0	0	1
4.6872	5.6788	4.975633333333334	4.9897	2425.0	0	1
4.6872	5.6788	2.9484999999999997	6.4603	2425.0	0	1
4.6872	5.6788	2.9484999999999997	4.9897	2425.0	0	0
4.6872	5.6788	4.975633333333334	6.4603	2425.0	0	1
4.6872	5.6788	4.975633333333334	4.9897	2425.0	0	1
4.6872	5.6788	2.9484999999999997	6.4603	2425.0	0	1
4.6872	5.6788	2.9484999999999997	4.9897	2425.0	0	0
4.6872	4.50364	4.975633333333334	6.4603	2425.0	0	1
4.6872	4.50364	4.975633333333334	4.9897	2425.0	0	0
4.6872	4.50364	2.9484999999999997	6.4603	2425.0	0	0
4.6872	4.50364	2.9484999999999997	4.9897	2425.0	0	0
4.6872	4.50364	4.975633333333334	6.4603	2425.0	0	1
4.6872	4.50364	4.975633333333334	4.9897	2425.0	0	0
4.6872	4.50364	2.9484999999999997	6.4603	2425.0	0	0
4.6872	4.50364	2.9484999999999997	4.9897	2425.0	0	0
5.5564	6.70594	6.449133333333333	7.49045	2442.0	0	1
6.0039	6.52428	6.368033333333333	5.8879	2455.0	0	1
4.7994	6.1042	4.3793	8.1021	2456.0	1	1
4.9504	7.55118	5.161766666666666	7.26445	2486.0	1	1
5.265	6.54302	5.360433333333333	6.79655	2513.0	0	1
3.8616	4.8957999999999995	6.1431000000000004	4.96715	2532.0	1	1
2.0478	4.78348	2.8904	5.6617	2542.0	1	0
2.0478	4.78348	2.8904	5.6617	2542.0	1	0
2.0478	4.78348	2.8904	5.6617	2542.0	1	0
2.0478	4.78348	2.8904	5.6617	2542.0	1	0
6.7099	7.90678	6.5166	8.55255	2728.0	0	1
5.5264	7.121899999999999	5.4571	7.65795	2746.0	0	1
2.096	4.4185	3.1036333333333332	5.2722999999999995	2752.0	0	0
0.0	3.5007600000000005	3.0475333333333334	5.8841	3125.0	1	0
0.0	3.5007600000000005	3.0475333333333334	4.16155	3125.0	1	0
0.0	3.5007600000000005	1.888866666666667	5.8841	3125.0	1	0
0.0	3.5007600000000005	1.888866666666667	4.16155	3125.0	1	0
0.0	3.5007600000000005	3.0475333333333334	5.8841	3125.0	1	0
0.0	3.5007600000000005	3.0475333333333334	4.16155	3125.0	1	0
0.0	3.5007600000000005	1.888866666666667	5.8841	3125.0	1	0
0.0	3.5007600000000005	1.888866666666667	4.16155	3125.0	1	0
0.0	3.9603200000000003	3.0475333333333334	5.8841	3125.0	1	0
0.0	3.9603200000000003	3.0475333333333334	4.16155	3125.0	1	0
0.0	3.9603200000000003	1.888866666666667	5.8841	3125.0	1	0
0.0	3.9603200000000003	1.888866666666667	4.16155	3125.0	1	0
0.0	3.9603200000000003	3.0475333333333334	5.8841	3125.0	1	0
0.0	3.9603200000000003	3.0475333333333334	4.16155	3125.0	1	0
0.0	3.9603200000000003	1.888866666666667	5.8841	3125.0	1	0
0.0	3.9603200000000003	1.888866666666667	4.16155	3125.0	1	0
0.0	3.5007600000000005	3.0475333333333334	5.8841	3125.0	1	0
0.0	3.5007600000000005	3.0475333333333334	4.16155	3125.0	1	0
0.0	3.5007600000000005	1.888866666666667	5.8841	3125.0	1	0
0.0	3.5007600000000005	1.888866666666667	4.16155	3125.0	1	0
0.0	3.5007600000000005	3.0475333333333334	5.8841	3125.0	1	0
0.0	3.5007600000000005	3.0475333333333334	4.16155	3125.0	1	0
0.0	3.5007600000000005	1.888866666666667	5.8841	3125.0	1	0
0.0	3.5007600000000005	1.888866666666667	4.16155	3125.0	1	0
0.0	3.9603200000000003	3.0475333333333334	5.8841	3125.0	1	0
0.0	3.9603200000000003	3.0475333333333334	4.16155	3125.0	1	0
0.0	3.9603200000000003	1.888866666666667	5.8841	3125.0	1	0
0.0	3.9603200000000003	1.888866666666667	4.16155	3125.0	1	0
0.0	3.9603200000000003	3.0475333333333334	5.8841	3125.0	1	0
0.0	3.9603200000000003	3.0475333333333334	4.16155	3125.0	1	0
0.0	3.9603200000000003	1.888866666666667	5.8841	3125.0	1	0
0.0	3.9603200000000003	1.888866666666667	4.16155	3125.0	1	0
0.0	2.8072000000000004	0.4406333333333334	4.2393	3258.0	1	0
0.0	2.8072000000000004	0.4406333333333334	6.3483	3258.0	1	0
0.0	2.8072000000000004	5.0652	4.2393	3258.0	1	0
0.0	2.8072000000000004	5.0652	6.3483	3258.0	1	0
0.0	2.8072000000000004	0.4406333333333334	4.2393	3258.0	1	0
0.0	2.8072000000000004	0.4406333333333334	6.3483	3258.0	1	0
0.0	2.8072000000000004	5.0652	4.2393	3258.0	1	0
0.0	2.8072000000000004	5.0652	6.3483	3258.0	1	0
0.0	5.8766	0.4406333333333334	4.2393	3258.0	1	0
0.0	5.8766	0.4406333333333334	6.3483	3258.0	1	0
0.0	5.8766	5.0652	4.2393	3258.0	1	0
0.0	5.8766	5.0652	6.3483	3258.0	1	0
0.0	5.8766	0.4406333333333334	4.2393	3258.0	1	0
0.0	5.8766	0.4406333333333334	6.3483	3258.0	1	0
0.0	5.8766	5.0652	4.2393	3258.0	1	0
0.0	5.8766	5.0652	6.3483	3258.0	1	0
0.0	2.8072000000000004	0.4406333333333334	4.2393	3258.0	1	0
0.0	2.8072000000000004	0.4406333333333334	6.3483	3258.0	1	0
0.0	2.8072000000000004	5.0652	4.2393	3258.0	1	0
0.0	2.8072000000000004	5.0652	6.3483	3258.0	1	0
0.0	2.8072000000000004	0.4406333333333334	4.2393	3258.0	1	0
0.0	2.8072000000000004	0.4406333333333334	6.3483	3258.0	1	0
0.0	2.8072000000000004	5.0652	4.2393	3258.0	1	0
0.0	2.8072000000000004	5.0652	6.3483	3258.0	1	0
0.0	5.8766	0.4406333333333334	4.2393	3258.0	1	0
0.0	5.8766	0.4406333333333334	6.3483	3258.0	1	0
0.0	5.8766	5.0652	4.2393	3258.0	1	0
0.0	5.8766	5.0652	6.3483	3258.0	1	0
0.0	5.8766	0.4406333333333334	4.2393	3258.0	1	0
0.0	5.8766	0.4406333333333334	6.3483	3258.0	1	0
0.0	5.8766	5.0652	4.2393	3258.0	1	0
0.0	5.8766	5.0652	6.3483	3258.0	1	0
0.6136	2.53754	1.4356333333333333	4.163399999999999	3308.0	0	0
1.9882	4.9558599999999995	3.8937666666666666	5.50065	3437.0	0	0
1.9882	4.9558599999999995	3.8937666666666666	4.33435	3437.0	0	0
1.9882	4.9558599999999995	2.4301333333333335	5.50065	3437.0	0	0
1.9882	4.9558599999999995	2.4301333333333335	4.33435	3437.0	0	0
1.9882	4.9558599999999995	3.8937666666666666	5.50065	3437.0	0	0
1.9882	4.9558599999999995	3.8937666666666666	4.33435	3437.0	0	0
1.9882	4.9558599999999995	2.4301333333333335	5.50065	3437.0	0	0
1.9882	4.9558599999999995	2.4301333333333335	4.33435	3437.0	0	0
1.9882	3.8105800000000003	3.8937666666666666	5.50065	3437.0	0	0
1.9882	3.8105800000000003	3.8937666666666666	4.33435	3437.0	0	0
1.9882	3.8105800000000003	2.4301333333333335	5.50065	3437.0	0	0
1.9882	3.8105800000000003	2.4301333333333335	4.33435	3437.0	0	0
1.9882	3.8105800000000003	3.8937666666666666	5.50065	3437.0	0	0
1.9882	3.8105800000000003	3.8937666666666666	4.33435	3437.0	0	0
1.9882	3.8105800000000003	2.4301333333333335	5.50065	3437.0	0	0
1.9882	3.8105800000000003	2.4301333333333335	4.33435	3437.0	0	0
1.9882	4.9558599999999995	3.8937666666666666	5.50065	3437.0	0	0
1.9882	4.9558599999999995	3.8937666666666666	4.33435	3437.0	0	0
1.9882	4.9558599999999995	2.4301333333333335	5.50065	3437.0	0	0
1.9882	4.9558599999999995	2.4301333333333335	4.33435	3437.0	0	0
1.9882	4.9558599999999995	3.8937666666666666	5.50065	3437.0	0	0
1.9882	4.9558599999999995	3.8937666666666666	4.33435	3437.0	0	0
1.9882	4.9558599999999995	2.4301333333333335	5.50065	3437.0	0	0
1.9882	4.9558599999999995	2.4301333333333335	4.33435	3437.0	0	0
1.9882	3.8105800000000003	3.8937666666666666	5.50065	3437.0	0	0
1.9882	3.8105800000000003	3.8937666666666666	4.33435	3437.0	0	0
1.9882	3.8105800000000003	2.4301333333333335	5.50065	3437.0	0	0
1.9882	3.8105800000000003	2.4301333333333335	4.33435	3437.0	0	0
1.9882	3.8105800000000003	3.8937666666666666	5.50065	3437.0	0	0
1.9882	3.8105800000000003	3.8937666666666666	4.33435	3437.0	0	0
1.9882	3.8105800000000003	2.4301333333333335	5.50065	3437.0	0	0
1.9882	3.8105800000000003	2.4301333333333335	4.33435	3437.0	0	0
3.3436	5.66062	3.7228333333333334	4.72085	3478.0	0	0
5.4443	7.4448799999999995	5.1434999999999995	8.7106	3675.0	0	1
