# Supplementary material
Source: Research Square preprint supplement (doi:10.21203/rs.3.rs-9060848/v1)
Supplement: Supplementary file 9 [file 7f6aaa3e7384c497732011bc.xlsx]

## Sheet: Table S9
	Coef.	Std.Err.	t	P>|t|	[0.025	0.975]
const	3.2520179748975746	0.11804991812232718	27.54782067301163	4.31295572300104e-112	3.0202231446586945	3.4838128051364547
ICOS_expression	0.555291931154928	0.02158805282113251	25.722186977945213	7.460682162264891e-102	0.5129030915991303	0.5976807707107258
Stage_numeric	0.006669989883389348	0.0485508004735768	0.13738166659104645	0.890770643160149	-0.08866107626841355	0.10200105603519224
