# Supplementary material
Source: Research Square preprint supplement (doi:10.21203/rs.3.rs-9060848/v1)
Supplement: Supplementary file 10 [file 89842a50df1cca40ffef5833.xlsx]

## Sheet: Tabel S1
Dataset	Gene	Test	Statistic	P_value
GSE89632	ICOS	Kruskal-Wallis	0.8420217209690861	0.656382972733331
	ICOSLG	Kruskal-Wallis	0.9698351770745144	0.6157479393617342
GSE164760	ICOS	Kruskal-Wallis	12.617824808781052	0.01330230535800245
	ICOSLG	Kruskal-Wallis	3.4433521444522057	0.4865438836403463
