# Supplementary material
Source: Research Square preprint supplement (doi:10.21203/rs.3.rs-9060848/v1)
Supplement: Supplementary file 11 [file 9015de7d218e5a8ed7476377.xlsx]

## Sheet: Table S5
Signature	Median_ICOS_High	Median_ICOS_Low	Delta_Median	P_value	FDR
Checkpoint_Inhibitory	24.4330637875	22.95762853175	1.47543525575	0.14214730623322894	0.17768413279153616
Checkpoint_Costimulatory	28.842824235000002	24.266254148250002	4.576570086749999	0.000504530776084312	0.00252265388042156
Tcell_Activation	22.96405441583333	21.42328600375	1.540768412083331	0.09981285500851722	0.16635475834752872
Tcell_Exhaustion	24.393057733	21.9456579472	2.4473997857999983	0.09620167143283066	0.16635475834752872
Cytokines_Chemokines	44.03920624416667	39.33055609316666	4.708650151000008	0.20971946639161898	0.20971946639161898
