# Supplementary material
Source: Research Square preprint supplement (doi:10.21203/rs.3.rs-9060848/v1)
Supplement: Supplementary file 12 [file 99e2e3fa3ea5f58ad63ccb99.xlsx]

## Sheet: Figure Index
Manuscript Figure	Panel	Description
Figure 1	A	Study conceptual framework
	B	ICOS expression across Healthy, MASLD, MASH (GSE89632)
	C	ICOSLG expression across early stages
Figure 2	A	ICOS expression across advanced stages (Healthy → NASH → Cirrhosis → Adjacent → Tumor)
	B	Pairwise Δ median shifts
	C	ICOS distribution density (if retained)
Figure 3	A	Hallmark GSEA enrichment (ICOS-High vs ICOS-Low)
	B	Immune signature heatmap (group-level medians)
	C	Tumor-level immune gene architecture heatmap
Figure 4	A	ICOS expression by etiology (viral vs non-viral)
	B	ICOS–exhaustion correlation by etiology
	C	ICOS–exhaustion correlation heatmap
	D	Stage stratified ICOS-exhaustion coupling
Figure 5	A	Kaplan–Meier survival (ICOS high vs low)
	B	Multivariable Cox forest plot
	C	Immune architecture correlation matrix
Figure 6	A	PCA immune clustering
	B	Cluster-level immune feature heatmap
	C	Kaplan–Meier by immune cluster

## Sheet: Supplementary Tables Index
Supplementary Item	Description
Table S1	Early-stage and Advanced stage ICOS/ICOSLG KruskalWallis statistics
Table S2	Pairwise stage comparisons
Table S3	Full Hallmark GSEA results
Table S4	Immune gene differential results
Table S5	Immune signature summary statistics
Table S6	TCGA etiology stratification data
Table S7	ICOS–exhaustion correlation summary
Table S8	Stage stratified correlations
Table S9	Stage-adjusted regression coefficients
Table S10	Cox model coefficients (Stage-adjusted)
Table S11	Cox model coefficients (Fully adjusted)
Table S12	TCGA Immune corelation summary
Table S13	Immune cluster assignments
