# Supplementary material
Source: Research Square preprint supplement (doi:10.21203/rs.3.rs-9060848/v1)
Supplement: Supplementary file 13 [file 9efb70c78c0f69efe0b28bb5.xlsx]

## Sheet: Table S6
ICOS_expression	Patient_ID	OS	OS.time	ICOS_group	_PATIENT	viral_hepatitis_serology	Etiology_Group	Exhaustion_score
1.3011	TCGA-BW-A5NP	0	0.0	FALSE	TCGA-BW-A5NP		Non-viral	3.79892
4.8064	TCGA-RC-A6M3	0	0.0	TRUE	TCGA-RC-A6M3		Non-viral	5.71526
3.8421	TCGA-CC-A9FU	0	0.0	TRUE	TCGA-CC-A9FU	Hepatitis C Antibody|Hepatitis B Surface Antigen	Viral	5.377039999999999
6.4915	TCGA-BW-A5NQ	0	0.0	TRUE	TCGA-BW-A5NQ		Non-viral	8.0365
4.7842	TCGA-CC-A9FV	0	0.0	TRUE	TCGA-CC-A9FV	Hepatitis C Antibody|Hepatitis B Surface Antigen	Viral	7.38752
4.575	TCGA-FV-A495	0	1.0	TRUE	TCGA-FV-A495		Non-viral	6.410520000000001
3.4757	TCGA-ED-A97K	0	6.0	TRUE	TCGA-ED-A97K	Hepatitis B Surface Antigen	Viral	5.42328
2.4249	TCGA-ED-A7PX	0	6.0	FALSE	TCGA-ED-A7PX	Hepatitis B Surface Antigen	Viral	5.21096
0.6326	TCGA-ED-A7PZ	0	6.0	FALSE	TCGA-ED-A7PZ	Hepatitis B Surface Antigen	Viral	2.92564
1.904	TCGA-BC-A3KF	0	8.0	FALSE	TCGA-BC-A3KF		Non-viral	3.80938
3.592	TCGA-DD-AACK	0	9.0	TRUE	TCGA-DD-AACK		Non-viral	4.75844
4.905	TCGA-RC-A6M6	0	9.0	TRUE	TCGA-RC-A6M6		Non-viral	6.8557999999999995
6.8687	TCGA-DD-A4NR	1	9.0	TRUE	TCGA-DD-A4NR	Hepatitis B Surface Antigen|HBV Surface Antibody|HBV Core Antibody	Viral	8.7509
0.7168	TCGA-FV-A496	0	10.0	FALSE	TCGA-FV-A496		Non-viral	2.97694
0.0	TCGA-DD-A3A8	1	11.0	FALSE	TCGA-DD-A3A8	Hepatitis B Surface Antigen|HBV Surface Antibody|HBV Core Antibody	Viral	2.98318
0.0	TCGA-DD-A3A8	1	11.0	FALSE	TCGA-DD-A3A8	Hepatitis B Surface Antigen|HBV Surface Antibody|HBV Core Antibody	Viral	5.09378
0.0	TCGA-DD-A3A8	1	11.0	FALSE	TCGA-DD-A3A8	Hepatitis B Surface Antigen|HBV Surface Antibody|HBV Core Antibody	Viral	2.98318
0.0	TCGA-DD-A3A8	1	11.0	FALSE	TCGA-DD-A3A8	Hepatitis B Surface Antigen|HBV Surface Antibody|HBV Core Antibody	Viral	5.09378
3.3551	TCGA-DD-AADM	1	12.0	FALSE	TCGA-DD-AADM		Non-viral	4.86738
6.7415	TCGA-FV-A4ZQ	0	12.0	TRUE	TCGA-FV-A4ZQ	Hepatitis C Virus R	Viral	8.62924
2.6549	TCGA-DD-A11B	1	14.0	FALSE	TCGA-DD-A11B	Hepatitis B Surface Antigen|HBV Surface Antibody|HBV Core Antibody	Viral	5.18872
2.6549	TCGA-DD-A11B	1	14.0	FALSE	TCGA-DD-A11B	Hepatitis B Surface Antigen|HBV Surface Antibody|HBV Core Antibody	Viral	3.3410400000000005
2.6549	TCGA-DD-A11B	1	14.0	FALSE	TCGA-DD-A11B	Hepatitis B Surface Antigen|HBV Surface Antibody|HBV Core Antibody	Viral	5.18872
2.6549	TCGA-DD-A11B	1	14.0	FALSE	TCGA-DD-A11B	Hepatitis B Surface Antigen|HBV Surface Antibody|HBV Core Antibody	Viral	3.3410400000000005
2.8488	TCGA-RC-A6M5	0	15.0	FALSE	TCGA-RC-A6M5		Non-viral	4.39058
2.3193	TCGA-DD-AAC8	1	16.0	FALSE	TCGA-DD-AAC8		Non-viral	4.12258
3.999	TCGA-EP-A2KC	1	19.0	TRUE	TCGA-EP-A2KC		Non-viral	4.51674
4.1802	TCGA-BW-A5NO	0	20.0	TRUE	TCGA-BW-A5NO		Non-viral	5.41992
6.1094	TCGA-5C-AAPD	0	20.0	TRUE	TCGA-5C-AAPD	HBV Surface Antibody	Viral	8.071340000000001
3.981	TCGA-ZP-A9D1	0	21.0	TRUE	TCGA-ZP-A9D1		Non-viral	4.7613
1.3959	TCGA-RC-A6M4	0	22.0	FALSE	TCGA-RC-A6M4		Non-viral	2.44504
1.1304	TCGA-T1-A6J8	0	23.0	FALSE	TCGA-T1-A6J8		Non-viral	3.5431799999999996
1.1345	TCGA-G3-AAV4	1	27.0	FALSE	TCGA-G3-AAV4		Non-viral	3.3386400000000003
1.41	TCGA-WQ-A9G7	0	30.0	FALSE	TCGA-WQ-A9G7		Non-viral	5.37688
2.4132	TCGA-GJ-A6C0	1	31.0	FALSE	TCGA-GJ-A6C0		Non-viral	5.76668
0.5174	TCGA-BC-A10Z	1	34.0	FALSE	TCGA-BC-A10Z		Non-viral	2.7398000000000002
0.5174	TCGA-BC-A10Z	1	34.0	FALSE	TCGA-BC-A10Z		Non-viral	5.21798
0.5174	TCGA-BC-A10Z	1	34.0	FALSE	TCGA-BC-A10Z		Non-viral	2.7398000000000002
0.5174	TCGA-BC-A10Z	1	34.0	FALSE	TCGA-BC-A10Z		Non-viral	5.21798
2.9198	TCGA-2Y-A9HA	1	36.0	FALSE	TCGA-2Y-A9HA	Hepatitis C Antibody	Viral	3.6974000000000005
1.0801	TCGA-DD-A73E	0	44.0	FALSE	TCGA-DD-A73E	Hepatitis B Surface Antigen|HBV Surface Antibody	Viral	1.6643000000000001
2.2646	TCGA-5R-AAAM	1	46.0	FALSE	TCGA-5R-AAAM	Hepatitis C Antibody|Hepatitis B Surface Antigen	Viral	5.12912
4.7187	TCGA-UB-A7MD	1	52.0	TRUE	TCGA-UB-A7MD	Hepatitis C Antibody|Hepatitis C Virus R|HCV Genotype|Hepatitis B Surface Antigen	Viral	5.7746
3.9647	TCGA-ED-A8O6	1	56.0	TRUE	TCGA-ED-A8O6	Hepatitis C Antibody|Hepatitis B Surface Antigen	Viral	5.543820000000001
3.2073	TCGA-G3-A7M9	1	56.0	FALSE	TCGA-G3-A7M9	Hepatitis C Antibody|Hepatitis B Surface Antigen|HBV Surface Antibody	Viral	5.669919999999999
2.553	TCGA-KR-A7K0	1	65.0	FALSE	TCGA-KR-A7K0	Hepatitis C Antibody	Viral	4.62408
3.8609	TCGA-G3-AAV6	1	65.0	TRUE	TCGA-G3-AAV6	Hepatitis B Surface Antigen	Viral	5.164540000000001
2.6852	TCGA-GJ-A9DB	1	67.0	FALSE	TCGA-GJ-A9DB		Non-viral	5.16988
0.6061	TCGA-DD-A11A	0	79.0	FALSE	TCGA-DD-A11A	Hepatitis B Surface Antigen|HBV Core Antibody	Viral	2.61604
0.6061	TCGA-DD-A11A	0	79.0	FALSE	TCGA-DD-A11A	Hepatitis B Surface Antigen|HBV Core Antibody	Viral	5.817359999999999
0.6061	TCGA-DD-A11A	0	79.0	FALSE	TCGA-DD-A11A	Hepatitis B Surface Antigen|HBV Core Antibody	Viral	2.61604
0.6061	TCGA-DD-A11A	0	79.0	FALSE	TCGA-DD-A11A	Hepatitis B Surface Antigen|HBV Core Antibody	Viral	5.817359999999999
4.1845	TCGA-CC-5260	1	87.0	TRUE	TCGA-CC-5260	Hepatitis C Antibody|Hepatitis B Surface Antigen	Viral	5.49098
4.0808	TCGA-BC-A10W	1	91.0	TRUE	TCGA-BC-A10W	Hepatitis B Surface Antigen	Viral	6.2111600000000005
4.0808	TCGA-BC-A10W	1	91.0	TRUE	TCGA-BC-A10W	Hepatitis B Surface Antigen	Viral	5.39274
4.0808	TCGA-BC-A10W	1	91.0	TRUE	TCGA-BC-A10W	Hepatitis B Surface Antigen	Viral	6.2111600000000005
4.0808	TCGA-BC-A10W	1	91.0	TRUE	TCGA-BC-A10W	Hepatitis B Surface Antigen	Viral	5.39274
4.8655	TCGA-HP-A5MZ	1	91.0	TRUE	TCGA-HP-A5MZ	Hepatitis C Antibody|Hepatitis B Surface Antigen|HBV Surface Antibody	Viral	6.372019999999999
4.3946	TCGA-QA-A7B7	0	94.0	TRUE	TCGA-QA-A7B7		Non-viral	5.202540000000001
5.4199	TCGA-CC-5261	1	97.0	TRUE	TCGA-CC-5261	Hepatitis C Antibody|Hepatitis B Surface Antigen	Viral	5.64188
6.8267	TCGA-CC-A1HT	1	101.0	TRUE	TCGA-CC-A1HT	Hepatitis C Antibody|Hepatitis B Surface Antigen	Viral	8.446360000000002
4.6148	TCGA-CC-5264	1	102.0	TRUE	TCGA-CC-5264	Hepatitis C Antibody|Hepatitis B Surface Antigen	Viral	5.553660000000001
4.443	TCGA-CC-5262	1	103.0	TRUE	TCGA-CC-5262	Hepatitis C Antibody|Hepatitis B Surface Antigen	Viral	5.4648
5.1397	TCGA-DD-AACL	1	107.0	TRUE	TCGA-DD-AACL		Non-viral	7.678699999999999
4.2397	TCGA-DD-AADF	1	115.0	TRUE	TCGA-DD-AADF		Non-viral	6.62886
3.8894	TCGA-CC-5263	1	129.0	TRUE	TCGA-CC-5263	Hepatitis C Antibody|Hepatitis B Surface Antigen	Viral	5.1953
5.0603	TCGA-CC-5258	1	129.0	TRUE	TCGA-CC-5258	Hepatitis C Antibody|HBV Surface Antibody	Viral	6.3528199999999995
1.7344	TCGA-DD-AAD0	0	137.0	FALSE	TCGA-DD-AAD0		Non-viral	3.30136
4.3182	TCGA-CC-A8HT	1	140.0	TRUE	TCGA-CC-A8HT	Hepatitis C Antibody|Hepatitis B Surface Antigen	Viral	5.9148000000000005
0.6947	TCGA-DD-AAE6	0	141.0	FALSE	TCGA-DD-AAE6		Non-viral	2.55736
1.3818	TCGA-BC-A112	1	153.0	FALSE	TCGA-BC-A112		Non-viral	3.8632999999999997
1.3818	TCGA-BC-A112	1	153.0	FALSE	TCGA-BC-A112		Non-viral	3.8632999999999997
1.4556	TCGA-DD-AACX	0	170.0	FALSE	TCGA-DD-AACX		Non-viral	4.16898
2.6668	TCGA-DD-A39Y	1	171.0	FALSE	TCGA-DD-A39Y	Hepatitis B Surface Antigen|HBV Surface Antibody|HBV Core Antibody	Viral	4.74022
6.2622	TCGA-DD-AACZ	1	171.0	TRUE	TCGA-DD-AACZ		Non-viral	7.93806
3.3397	TCGA-G3-A3CI	0	180.0	FALSE	TCGA-G3-A3CI		Non-viral	5.788200000000001
3.0547	TCGA-DD-A1EI	0	183.0	FALSE	TCGA-DD-A1EI	Hepatitis B Surface Antigen|HBV D	Viral	5.03486
3.0547	TCGA-DD-A1EI	0	183.0	FALSE	TCGA-DD-A1EI	Hepatitis B Surface Antigen|HBV D	Viral	5.33854
3.0547	TCGA-DD-A1EI	0	183.0	FALSE	TCGA-DD-A1EI	Hepatitis B Surface Antigen|HBV D	Viral	5.03486
3.0547	TCGA-DD-A1EI	0	183.0	FALSE	TCGA-DD-A1EI	Hepatitis B Surface Antigen|HBV D	Viral	5.33854
2.1622	TCGA-FV-A3R2	1	194.0	FALSE	TCGA-FV-A3R2	Hepatitis C Antibody|Hepatitis B Surface Antigen|HBV Surface Antibody	Viral	6.25816
2.1622	TCGA-FV-A3R2	1	194.0	FALSE	TCGA-FV-A3R2	Hepatitis C Antibody|Hepatitis B Surface Antigen|HBV Surface Antibody	Viral	3.7020600000000004
2.1622	TCGA-FV-A3R2	1	194.0	FALSE	TCGA-FV-A3R2	Hepatitis C Antibody|Hepatitis B Surface Antigen|HBV Surface Antibody	Viral	6.25816
2.1622	TCGA-FV-A3R2	1	194.0	FALSE	TCGA-FV-A3R2	Hepatitis C Antibody|Hepatitis B Surface Antigen|HBV Surface Antibody	Viral	3.7020600000000004
2.7024	TCGA-DD-AACH	1	195.0	FALSE	TCGA-DD-AACH		Non-viral	4.778499999999999
3.5853	TCGA-CC-A9FS	0	211.0	TRUE	TCGA-CC-A9FS	Hepatitis C Antibody|Hepatitis B Surface Antigen	Viral	4.6718
5.7669	TCGA-UB-A7MF	1	214.0	TRUE	TCGA-UB-A7MF	Hepatitis C Antibody|Hepatitis B Surface Antigen|HBV Core Antibody|HBV D	Viral	8.02004
6.104	TCGA-CC-A7IE	1	217.0	TRUE	TCGA-CC-A7IE	Hepatitis C Antibody|Hepatitis B Surface Antigen	Viral	7.967319999999999
3.655	TCGA-CC-A123	0	219.0	TRUE	TCGA-CC-A123	Hepatitis C Antibody|Hepatitis B Surface Antigen	Viral	4.253159999999999
1.9288	TCGA-DD-A119	1	223.0	FALSE	TCGA-DD-A119	Hepatitis B Surface Antigen|HBV Surface Antibody|HBV Core Antibody	Viral	4.87714
1.9288	TCGA-DD-A119	1	223.0	FALSE	TCGA-DD-A119	Hepatitis B Surface Antigen|HBV Surface Antibody|HBV Core Antibody	Viral	4.03022
1.9288	TCGA-DD-A119	1	223.0	FALSE	TCGA-DD-A119	Hepatitis B Surface Antigen|HBV Surface Antibody|HBV Core Antibody	Viral	4.87714
1.9288	TCGA-DD-A119	1	223.0	FALSE	TCGA-DD-A119	Hepatitis B Surface Antigen|HBV Surface Antibody|HBV Core Antibody	Viral	4.03022
1.7982	TCGA-MR-A520	0	229.0	FALSE	TCGA-MR-A520	Hepatitis C Antibody|Hepatitis B Surface Antigen|HBV Core Antibody	Viral	4.00672
3.8932	TCGA-DD-A3A1	1	233.0	TRUE	TCGA-DD-A3A1		Non-viral	4.666939999999999
3.8932	TCGA-DD-A3A1	1	233.0	TRUE	TCGA-DD-A3A1		Non-viral	5.7082
3.8932	TCGA-DD-A3A1	1	233.0	TRUE	TCGA-DD-A3A1		Non-viral	4.666939999999999
3.8932	TCGA-DD-A3A1	1	233.0	TRUE	TCGA-DD-A3A1		Non-viral	5.7082
3.0717	TCGA-FV-A3I1	1	247.0	FALSE	TCGA-FV-A3I1	Hepatitis C Antibody|Hepatitis B Surface Antigen|HBV Surface Antibody	Viral	6.31142
3.0717	TCGA-FV-A3I1	1	247.0	FALSE	TCGA-FV-A3I1	Hepatitis C Antibody|Hepatitis B Surface Antigen|HBV Surface Antibody	Viral	5.1865
3.0717	TCGA-FV-A3I1	1	247.0	FALSE	TCGA-FV-A3I1	Hepatitis C Antibody|Hepatitis B Surface Antigen|HBV Surface Antibody	Viral	6.31142
3.0717	TCGA-FV-A3I1	1	247.0	FALSE	TCGA-FV-A3I1	Hepatitis C Antibody|Hepatitis B Surface Antigen|HBV Surface Antibody	Viral	5.1865
4.1865	TCGA-CC-A9FW	0	248.0	TRUE	TCGA-CC-A9FW	Hepatitis C Antibody|Hepatitis B Surface Antigen	Viral	5.69868
3.4144	TCGA-CC-5259	0	250.0	TRUE	TCGA-CC-5259	Hepatitis C Antibody|Hepatitis B Surface Antigen	Viral	5.84086
5.3786	TCGA-2Y-A9HB	0	260.0	TRUE	TCGA-2Y-A9HB	Hepatitis C Virus R|HCV Genotype	Viral	6.71048
2.6956	TCGA-CC-A7IK	1	262.0	FALSE	TCGA-CC-A7IK	Hepatitis C Antibody|Hepatitis B Surface Antigen	Viral	3.43954
3.2082	TCGA-4R-AA8I	1	262.0	FALSE	TCGA-4R-AA8I	Hepatitis C Antibody|Hepatitis B Surface Antigen	Viral	4.78814
2.777	TCGA-CC-A5UE	1	272.0	FALSE	TCGA-CC-A5UE	Hepatitis C Antibody|Hepatitis B Surface Antigen	Viral	4.28208
0.5812	TCGA-CC-A7IL	1	278.0	FALSE	TCGA-CC-A7IL	Hepatitis C Antibody|Hepatitis B Surface Antigen	Viral	3.2264600000000003
2.8533	TCGA-CC-A8HV	1	279.0	FALSE	TCGA-CC-A8HV	Hepatitis C Antibody|Hepatitis B Surface Antigen	Viral	4.54352
0.6178	TCGA-DD-A73B	1	283.0	FALSE	TCGA-DD-A73B	Hepatitis B Surface Antigen	Viral	2.6797199999999997
3.6477	TCGA-MI-A75C	0	291.0	TRUE	TCGA-MI-A75C	HBV Surface Antibody	Viral	5.7976
1.1031	TCGA-ED-A66Y	1	296.0	FALSE	TCGA-ED-A66Y	Hepatitis B Surface Antigen	Viral	4.71846
2.2789	TCGA-CC-A7IG	1	299.0	FALSE	TCGA-CC-A7IG	Hepatitis C Antibody|Hepatitis B Surface Antigen	Viral	5.97048
2.373	TCGA-CC-A8HS	1	300.0	FALSE	TCGA-CC-A8HS	Hepatitis C Antibody|Hepatitis B Surface Antigen	Viral	4.4887
6.5719	TCGA-CC-A3M9	1	300.0	TRUE	TCGA-CC-A3M9	Hepatitis C Antibody|Hepatitis B Surface Antigen	Viral	9.386579999999999
5.1267	TCGA-EP-A3JL	0	303.0	TRUE	TCGA-EP-A3JL		Non-viral	6.9509799999999995
0.8729	TCGA-CC-A3MA	1	303.0	FALSE	TCGA-CC-A3MA	Hepatitis C Antibody|Hepatitis B Surface Antigen	Viral	3.76486
3.6198	TCGA-CC-A5UD	1	304.0	TRUE	TCGA-CC-A5UD	Hepatitis C Antibody|Hepatitis B Surface Antigen	Viral	4.29842
1.4	TCGA-BC-A10R	1	308.0	FALSE	TCGA-BC-A10R		Non-viral	5.800020000000001
1.4	TCGA-BC-A10R	1	308.0	FALSE	TCGA-BC-A10R		Non-viral	3.34168
1.4	TCGA-BC-A10R	1	308.0	FALSE	TCGA-BC-A10R		Non-viral	5.800020000000001
1.4	TCGA-BC-A10R	1	308.0	FALSE	TCGA-BC-A10R		Non-viral	3.34168
2.9887	TCGA-UB-AA0V	0	314.0	FALSE	TCGA-UB-AA0V	Hepatitis C Antibody|Hepatitis B Surface Antigen|HBV Core Antibody	Viral	5.14566
3.8165	TCGA-CC-A3MB	1	315.0	TRUE	TCGA-CC-A3MB	Hepatitis C Antibody|Hepatitis B Surface Antigen	Viral	4.855320000000001
1.6184	TCGA-5C-A9VH	0	322.0	FALSE	TCGA-5C-A9VH		Non-viral	4.47856
4.0893	TCGA-UB-AA0U	0	327.0	TRUE	TCGA-UB-AA0U	Hepatitis C Antibody|Hepatitis B Surface Antigen|HBV Core Antibody	Viral	5.08862
2.1057	TCGA-5C-A9VG	0	328.0	FALSE	TCGA-5C-A9VG		Non-viral	3.71558
5.3913	TCGA-MR-A8JO	0	330.0	TRUE	TCGA-MR-A8JO	Hepatitis C Antibody|Hepatitis B Surface Antigen|HBV Core Antibody	Viral	6.96072
1.9038	TCGA-ZS-A9CG	0	341.0	FALSE	TCGA-ZS-A9CG	Hepatitis C Antibody|Hepatitis B Surface Antigen	Viral	3.8355000000000006
0.0	TCGA-CC-A8HU	1	344.0	FALSE	TCGA-CC-A8HU	Hepatitis C Antibody|Hepatitis B Surface Antigen	Viral	4.204739999999999
2.5009	TCGA-WJ-A86L	0	345.0	FALSE	TCGA-WJ-A86L	Hepatitis C Antibody|Hepatitis B Surface Antigen|HBV Surface Antibody	Viral	4.08238
4.7442	TCGA-DD-AAC9	0	347.0	TRUE	TCGA-DD-AAC9		Non-viral	5.704040000000001
5.0059	TCGA-CC-A5UC	1	347.0	TRUE	TCGA-CC-A5UC	Hepatitis C Antibody|Hepatitis B Surface Antigen	Viral	5.61564
3.6636	TCGA-DD-A1EE	1	349.0	TRUE	TCGA-DD-A1EE	Hepatitis C Virus R|HCV Genotype|Hepatitis B Surface Antigen|HBV Surface Antibody|HBV Core Antibody	Viral	4.750719999999999
3.6636	TCGA-DD-A1EE	1	349.0	TRUE	TCGA-DD-A1EE	Hepatitis C Virus R|HCV Genotype|Hepatitis B Surface Antigen|HBV Surface Antibody|HBV Core Antibody	Viral	6.09636
3.6636	TCGA-DD-A1EE	1	349.0	TRUE	TCGA-DD-A1EE	Hepatitis C Virus R|HCV Genotype|Hepatitis B Surface Antigen|HBV Surface Antibody|HBV Core Antibody	Viral	4.750719999999999
3.6636	TCGA-DD-A1EE	1	349.0	TRUE	TCGA-DD-A1EE	Hepatitis C Virus R|HCV Genotype|Hepatitis B Surface Antigen|HBV Surface Antibody|HBV Core Antibody	Viral	6.09636
3.0155	TCGA-G3-AAV5	0	354.0	FALSE	TCGA-G3-AAV5	Hepatitis C Antibody|Hepatitis B Surface Antigen|HBV Surface Antibody|HBV Core Antibody	Viral	4.457479999999999
4.2264	TCGA-2Y-A9H6	0	357.0	TRUE	TCGA-2Y-A9H6		Non-viral	5.66758
0.6204	TCGA-G3-AAV1	1	359.0	FALSE	TCGA-G3-AAV1	Hepatitis C Antibody|Hepatitis B Surface Antigen|HBV Surface Antibody|HBV D	Viral	3.4156199999999997
5.14	TCGA-K7-AAU7	0	359.0	TRUE	TCGA-K7-AAU7		Non-viral	5.9169
2.0446	TCGA-G3-A7M7	0	361.0	FALSE	TCGA-G3-A7M7	Hepatitis C Antibody|Hepatitis B Surface Antigen	Viral	3.1453800000000003
4.0979	TCGA-G3-AAV7	0	361.0	TRUE	TCGA-G3-AAV7	Hepatitis B Surface Antigen|HBV Surface Antibody|HBV D	Viral	5.358700000000001
6.2512	TCGA-EP-A3RK	0	363.0	TRUE	TCGA-EP-A3RK		Non-viral	4.41356
6.2512	TCGA-EP-A3RK	0	363.0	TRUE	TCGA-EP-A3RK		Non-viral	7.9378
6.2512	TCGA-EP-A3RK	0	363.0	TRUE	TCGA-EP-A3RK		Non-viral	4.41356
6.2512	TCGA-EP-A3RK	0	363.0	TRUE	TCGA-EP-A3RK		Non-viral	7.9378
3.2668	TCGA-CC-A3MC	0	363.0	FALSE	TCGA-CC-A3MC	Hepatitis C Antibody|Hepatitis B Surface Antigen	Viral	4.57334
0.5872	TCGA-CC-A7IH	0	365.0	FALSE	TCGA-CC-A7IH	Hepatitis C Antibody|Hepatitis B Surface Antigen	Viral	2.7020000000000004
2.4614	TCGA-DD-AACF	1	365.0	FALSE	TCGA-DD-AACF		Non-viral	4.728260000000001
2.4808	TCGA-FV-A3R3	1	366.0	FALSE	TCGA-FV-A3R3		Non-viral	5.3027
2.7212	TCGA-LG-A9QD	0	366.0	FALSE	TCGA-LG-A9QD		Non-viral	4.499280000000001
0.7112	TCGA-G3-AAV2	0	372.0	FALSE	TCGA-G3-AAV2	Hepatitis C Antibody|Hepatitis C Virus R|Hepatitis B Surface Antigen|HBV Surface Antibody	Viral	2.92692
2.8255	TCGA-DD-A4NQ	1	373.0	FALSE	TCGA-DD-A4NQ	Hepatitis C Virus R|Hepatitis B Surface Antigen|HBV Surface Antibody|HBV Core Antibody	Viral	4.97304
2.364	TCGA-DD-AACD	1	381.0	FALSE	TCGA-DD-AACD		Non-viral	5.01768
5.8032	TCGA-CC-A7IJ	0	382.0	TRUE	TCGA-CC-A7IJ	Hepatitis C Antibody|Hepatitis B Surface Antigen	Viral	7.95782
1.9318	TCGA-LG-A6GG	0	387.0	FALSE	TCGA-LG-A6GG		Non-viral	3.378659999999999
0.0	TCGA-BC-A69I	0	387.0	FALSE	TCGA-BC-A69I		Non-viral	4.18358
0.9853	TCGA-ED-A7PY	0	390.0	FALSE	TCGA-ED-A7PY	Hepatitis B Surface Antigen	Viral	4.01976
5.468	TCGA-DD-A1EF	1	394.0	TRUE	TCGA-DD-A1EF	Hepatitis B Surface Antigen|HBV Surface Antibody|HBV Core Antibody	Viral	6.03204
5.468	TCGA-DD-A1EF	1	394.0	TRUE	TCGA-DD-A1EF	Hepatitis B Surface Antigen|HBV Surface Antibody|HBV Core Antibody	Viral	6.03204
2.3103	TCGA-ZP-A9D4	0	395.0	FALSE	TCGA-ZP-A9D4		Non-viral	3.3434600000000003
2.7529	TCGA-WQ-AB4B	0	395.0	FALSE	TCGA-WQ-AB4B		Non-viral	4.6432
4.2077	TCGA-3K-AAZ8	0	396.0	TRUE	TCGA-3K-AAZ8		Non-viral	4.89344
0.6226	TCGA-CC-A7II	0	399.0	FALSE	TCGA-CC-A7II	Hepatitis C Antibody|Hepatitis B Surface Antigen	Viral	4.18904
3.5077	TCGA-ED-A7XP	0	400.0	TRUE	TCGA-ED-A7XP	Hepatitis B Surface Antigen	Viral	5.170439999999999
3.7887	TCGA-ED-A66X	0	406.0	TRUE	TCGA-ED-A66X	Hepatitis B Surface Antigen	Viral	5.4465200000000005
2.2582	TCGA-ED-A8O5	0	406.0	FALSE	TCGA-ED-A8O5	Hepatitis C Antibody|Hepatitis B Surface Antigen	Viral	4.44288
2.2021	TCGA-ED-A82E	0	408.0	FALSE	TCGA-ED-A82E	Hepatitis C Antibody|Hepatitis B Surface Antigen	Viral	4.189539999999999
6.2488	TCGA-BD-A3EP	0	409.0	TRUE	TCGA-BD-A3EP		Non-viral	6.604699999999999
6.2488	TCGA-BD-A3EP	0	409.0	TRUE	TCGA-BD-A3EP		Non-viral	5.6677599999999995
6.2488	TCGA-BD-A3EP	0	409.0	TRUE	TCGA-BD-A3EP		Non-viral	6.604699999999999
6.2488	TCGA-BD-A3EP	0	409.0	TRUE	TCGA-BD-A3EP		Non-viral	5.6677599999999995
0.7212	TCGA-DD-AA3A	1	410.0	FALSE	TCGA-DD-AA3A	Hepatitis B Surface Antigen|HBV Surface Antibody|HBV Core Antibody	Viral	4.38266
3.7705	TCGA-YA-A8S7	1	412.0	TRUE	TCGA-YA-A8S7		Non-viral	6.46862
5.4859	TCGA-G3-AAV3	0	412.0	TRUE	TCGA-G3-AAV3		Non-viral	7.6845799999999995
3.5818	TCGA-DD-AACP	0	415.0	TRUE	TCGA-DD-AACP		Non-viral	5.448099999999999
3.7319	TCGA-DD-A1EL	1	415.0	TRUE	TCGA-DD-A1EL	Hepatitis B Surface Antigen|HBV Surface Antibody|HBV Core Antibody|HBV D	Viral	4.0258400000000005
3.7319	TCGA-DD-A1EL	1	415.0	TRUE	TCGA-DD-A1EL	Hepatitis B Surface Antigen|HBV Surface Antibody|HBV Core Antibody|HBV D	Viral	5.30494
3.7319	TCGA-DD-A1EL	1	415.0	TRUE	TCGA-DD-A1EL	Hepatitis B Surface Antigen|HBV Surface Antibody|HBV Core Antibody|HBV D	Viral	4.0258400000000005
3.7319	TCGA-DD-A1EL	1	415.0	TRUE	TCGA-DD-A1EL	Hepatitis B Surface Antigen|HBV Surface Antibody|HBV Core Antibody|HBV D	Viral	5.30494
4.2667	TCGA-G3-A25S	1	416.0	TRUE	TCGA-G3-A25S		Non-viral	5.58538
2.6846	TCGA-DD-A3A7	1	419.0	FALSE	TCGA-DD-A3A7	Hepatitis B Surface Antigen|HBV Surface Antibody|HBV Core Antibody	Viral	4.77514
6.1678	TCGA-ED-A627	0	423.0	TRUE	TCGA-ED-A627	Hepatitis C Antibody|Hepatitis B Surface Antigen	Viral	7.373279999999999
2.2955	TCGA-LG-A9QC	0	425.0	FALSE	TCGA-LG-A9QC		Non-viral	3.9345999999999997
3.828	TCGA-DD-AADC	1	425.0	TRUE	TCGA-DD-AADC		Non-viral	5.17604
3.0973	TCGA-ED-A7XO	0	427.0	FALSE	TCGA-ED-A7XO	Hepatitis C Antibody|Hepatitis B Surface Antigen	Viral	5.6517800000000005
0.8174	TCGA-G3-A7M8	0	430.0	FALSE	TCGA-G3-A7M8	Hepatitis C Antibody|Hepatitis B Surface Antigen|HBV Surface Antibody	Viral	4.28896
0.5993	TCGA-DD-AACQ	1	432.0	FALSE	TCGA-DD-AACQ		Non-viral	3.3632800000000005
3.7877	TCGA-DD-AADQ	0	436.0	TRUE	TCGA-DD-AADQ		Non-viral	5.54152
2.7254	TCGA-ES-A2HT	1	438.0	FALSE	TCGA-ES-A2HT		Non-viral	4.546359999999999
2.7254	TCGA-ES-A2HT	1	438.0	FALSE	TCGA-ES-A2HT		Non-viral	6.35442
2.7254	TCGA-ES-A2HT	1	438.0	FALSE	TCGA-ES-A2HT		Non-viral	4.546359999999999
2.7254	TCGA-ES-A2HT	1	438.0	FALSE	TCGA-ES-A2HT		Non-viral	6.35442
4.7696	TCGA-BC-A69H	0	444.0	TRUE	TCGA-BC-A69H		Non-viral	6.511699999999999
3.2357	TCGA-G3-A7M5	0	447.0	FALSE	TCGA-G3-A7M5	Hepatitis C Antibody|Hepatitis B Surface Antigen|HBV Surface Antibody	Viral	4.949039999999999
3.5067	TCGA-5R-AA1D	0	449.0	TRUE	TCGA-5R-AA1D	Hepatitis C Antibody|Hepatitis B Surface Antigen	Viral	5.720479999999999
4.5419	TCGA-G3-A25Y	1	452.0	TRUE	TCGA-G3-A25Y		Non-viral	6.091500000000001
5.9937	TCGA-DD-AADO	0	453.0	TRUE	TCGA-DD-AADO		Non-viral	8.14358
3.3867	TCGA-DD-AADP	0	458.0	TRUE	TCGA-DD-AADP		Non-viral	4.77836
2.6085	TCGA-RC-A7SH	0	468.0	FALSE	TCGA-RC-A7SH		Non-viral	4.95302
4.2142	TCGA-DD-AACG	1	469.0	TRUE	TCGA-DD-AACG		Non-viral	5.2431
2.8634	TCGA-RC-A7SK	0	472.0	FALSE	TCGA-RC-A7SK		Non-viral	3.54752
5.374	TCGA-DD-AADS	0	474.0	TRUE	TCGA-DD-AADS		Non-viral	7.644980000000001
3.1741	TCGA-G3-AAV0	0	476.0	FALSE	TCGA-G3-AAV0	Hepatitis C Antibody|Hepatitis B Surface Antigen|HBV Surface Antibody	Viral	4.97968
1.879	TCGA-DD-AAEB	0	478.0	FALSE	TCGA-DD-AAEB		Non-viral	4.72166
4.6918	TCGA-G3-AAUZ	0	480.0	TRUE	TCGA-G3-AAUZ	Hepatitis C Antibody|Hepatitis B Surface Antigen|HBV Surface Antibody|HBV D	Viral	6.28836
5.8285	TCGA-UB-A7ME	0	486.0	TRUE	TCGA-UB-A7ME	Hepatitis B Surface Antigen|HBV Core Antibody|HBV D	Viral	7.17654
2.7382	TCGA-UB-A7MC	0	500.0	FALSE	TCGA-UB-A7MC	Hepatitis C Antibody|Hepatitis B Surface Antigen|HBV D	Viral	3.5691200000000003
3.4773	TCGA-MI-A75E	0	507.0	TRUE	TCGA-MI-A75E	HCV Genotype	Viral	5.17684
4.2247	TCGA-K7-A6G5	0	512.0	TRUE	TCGA-K7-A6G5	HCV Genotype	Viral	5.5654
8.0555	TCGA-K7-A5RG	0	519.0	TRUE	TCGA-K7-A5RG	HCV Genotype	Viral	9.609679999999999
1.1051	TCGA-5R-AA1C	0	520.0	FALSE	TCGA-5R-AA1C	Hepatitis C Antibody|Hepatitis B Surface Antigen	Viral	4.557440000000001
4.4739	TCGA-G3-A5SM	0	520.0	TRUE	TCGA-G3-A5SM		Non-viral	5.809340000000001
3.3873	TCGA-DD-A3A3	1	535.0	TRUE	TCGA-DD-A3A3		Non-viral	4.321420000000001
3.3873	TCGA-DD-A3A3	1	535.0	TRUE	TCGA-DD-A3A3		Non-viral	5.72068
3.3873	TCGA-DD-A3A3	1	535.0	TRUE	TCGA-DD-A3A3		Non-viral	4.321420000000001
3.3873	TCGA-DD-A3A3	1	535.0	TRUE	TCGA-DD-A3A3		Non-viral	5.72068
3.6919	TCGA-O8-A75V	0	538.0	TRUE	TCGA-O8-A75V		Non-viral	5.83328
0.8711	TCGA-BC-A5W4	1	547.0	FALSE	TCGA-BC-A5W4		Non-viral	2.47774
3.6598	TCGA-DD-AAE1	0	552.0	TRUE	TCGA-DD-AAE1		Non-viral	4.47138
3.6438	TCGA-DD-AADU	0	554.0	TRUE	TCGA-DD-AADU		Non-viral	4.69818
3.1379	TCGA-DD-AAE0	0	555.0	FALSE	TCGA-DD-AAE0		Non-viral	5.136100000000001
2.9002	TCGA-DD-AADY	0	555.0	FALSE	TCGA-DD-AADY		Non-viral	3.1748
3.7532	TCGA-2Y-A9H5	1	555.0	TRUE	TCGA-2Y-A9H5	Hepatitis C Antibody|Hepatitis C Virus R|HCV Genotype	Viral	5.4633400000000005
0.0	TCGA-WX-AA47	1	556.0	FALSE	TCGA-WX-AA47	Hepatitis C Antibody	Viral	2.2915
1.8117	TCGA-DD-A1EK	1	558.0	FALSE	TCGA-DD-A1EK	Hepatitis B Surface Antigen|HBV Surface Antibody|HBV Core Antibody	Viral	4.679180000000001
6.341	TCGA-BC-A8YO	0	562.0	TRUE	TCGA-BC-A8YO		Non-viral	7.79768
5.0306	TCGA-DD-AAD1	0	564.0	TRUE	TCGA-DD-AAD1		Non-viral	6.87846
1.0874	TCGA-DD-AAE3	0	566.0	FALSE	TCGA-DD-AAE3		Non-viral	3.90308
2.7223	TCGA-EP-A12J	0	570.0	FALSE	TCGA-EP-A12J		Non-viral	5.2480199999999995
2.7223	TCGA-EP-A12J	0	570.0	FALSE	TCGA-EP-A12J		Non-viral	2.77412
2.7223	TCGA-EP-A12J	0	570.0	FALSE	TCGA-EP-A12J		Non-viral	5.2480199999999995
2.7223	TCGA-EP-A12J	0	570.0	FALSE	TCGA-EP-A12J		Non-viral	2.77412
2.0167	TCGA-DD-AADV	0	574.0	FALSE	TCGA-DD-AADV		Non-viral	4.2654000000000005
4.8144	TCGA-DD-AAEA	0	575.0	TRUE	TCGA-DD-AAEA		Non-viral	7.1009
4.9157	TCGA-RC-A7SF	0	579.0	TRUE	TCGA-RC-A7SF		Non-viral	5.87474
6.4723	TCGA-FV-A2QR	1	581.0	TRUE	TCGA-FV-A2QR		Non-viral	6.747019999999999
6.4723	TCGA-FV-A2QR	1	581.0	TRUE	TCGA-FV-A2QR		Non-viral	3.3848
6.4723	TCGA-FV-A2QR	1	581.0	TRUE	TCGA-FV-A2QR		Non-viral	6.747019999999999
6.4723	TCGA-FV-A2QR	1	581.0	TRUE	TCGA-FV-A2QR		Non-viral	3.3848
5.1044	TCGA-G3-A3CK	0	585.0	TRUE	TCGA-G3-A3CK		Non-viral	6.96058
3.2646	TCGA-DD-AADW	0	587.0	FALSE	TCGA-DD-AADW		Non-viral	3.8517200000000003
1.4843	TCGA-RC-A7SB	0	588.0	FALSE	TCGA-RC-A7SB		Non-viral	4.34916
0.8184	TCGA-G3-A3CJ	0	594.0	FALSE	TCGA-G3-A3CJ		Non-viral	3.656
3.121	TCGA-EP-A2KB	1	596.0	FALSE	TCGA-EP-A2KB		Non-viral	4.9780999999999995
1.6045	TCGA-DD-A39Z	1	601.0	FALSE	TCGA-DD-A39Z		Non-viral	3.6381799999999997
1.6045	TCGA-DD-A39Z	1	601.0	FALSE	TCGA-DD-A39Z		Non-viral	2.90548
1.6045	TCGA-DD-A39Z	1	601.0	FALSE	TCGA-DD-A39Z		Non-viral	3.6381799999999997
1.6045	TCGA-DD-A39Z	1	601.0	FALSE	TCGA-DD-A39Z		Non-viral	2.90548
0.554	TCGA-UB-A7MB	0	601.0	FALSE	TCGA-UB-A7MB	Hepatitis C Antibody|Hepatitis B Surface Antigen|HBV Core Antibody	Viral	2.35332
6.771	TCGA-DD-A1EC	0	602.0	TRUE	TCGA-DD-A1EC		Non-viral	8.43186
6.771	TCGA-DD-A1EC	0	602.0	TRUE	TCGA-DD-A1EC		Non-viral	5.0068600000000005
6.771	TCGA-DD-A1EC	0	602.0	TRUE	TCGA-DD-A1EC		Non-viral	8.43186
6.771	TCGA-DD-A1EC	0	602.0	TRUE	TCGA-DD-A1EC		Non-viral	5.0068600000000005
5.5231	TCGA-DD-AAE4	0	608.0	TRUE	TCGA-DD-AAE4		Non-viral	7.06144
2.8235	TCGA-EP-A26S	0	608.0	FALSE	TCGA-EP-A26S		Non-viral	3.49118
2.8235	TCGA-EP-A26S	0	608.0	FALSE	TCGA-EP-A26S		Non-viral	4.89204
2.8235	TCGA-EP-A26S	0	608.0	FALSE	TCGA-EP-A26S		Non-viral	3.49118
2.8235	TCGA-EP-A26S	0	608.0	FALSE	TCGA-EP-A26S		Non-viral	4.89204
3.123	TCGA-DD-A3A4	1	612.0	FALSE	TCGA-DD-A3A4		Non-viral	1.8894600000000001
3.123	TCGA-DD-A3A4	1	612.0	FALSE	TCGA-DD-A3A4		Non-viral	4.79092
3.123	TCGA-DD-A3A4	1	612.0	FALSE	TCGA-DD-A3A4		Non-viral	1.8894600000000001
3.123	TCGA-DD-A3A4	1	612.0	FALSE	TCGA-DD-A3A4		Non-viral	4.79092
2.8599	TCGA-WX-AA44	0	615.0	FALSE	TCGA-WX-AA44	Hepatitis C Antibody	Viral	5.321199999999999
2.9519	TCGA-G3-A5SL	0	621.0	FALSE	TCGA-G3-A5SL		Non-viral	3.5858000000000003
5.97	TCGA-EP-A2KA	1	627.0	TRUE	TCGA-EP-A2KA		Non-viral	7.5525
3.7367	TCGA-MI-A75I	0	630.0	TRUE	TCGA-MI-A75I		Non-viral	4.595339999999999
5.0527	TCGA-K7-A5RF	0	631.0	TRUE	TCGA-K7-A5RF	Hepatitis C Virus R	Viral	6.71926
3.5519	TCGA-G3-A7M6	0	632.0	TRUE	TCGA-G3-A7M6		Non-viral	5.0572
5.7021	TCGA-2Y-A9H8	1	633.0	TRUE	TCGA-2Y-A9H8	Hepatitis C Virus R|HBV Surface Antibody|HBV D	Viral	7.24486
0.0	TCGA-DD-AADL	0	636.0	FALSE	TCGA-DD-AADL		Non-viral	3.15854
4.8967	TCGA-DD-AAE2	0	638.0	TRUE	TCGA-DD-AAE2		Non-viral	6.7649
4.6857	TCGA-PD-A5DF	1	639.0	TRUE	TCGA-PD-A5DF		Non-viral	5.43802
4.2939	TCGA-RC-A7S9	0	640.0	TRUE	TCGA-RC-A7S9		Non-viral	6.314699999999999
2.3394	TCGA-DD-A39V	1	643.0	FALSE	TCGA-DD-A39V		Non-viral	7.939439999999999
2.3394	TCGA-DD-A39V	1	643.0	FALSE	TCGA-DD-A39V		Non-viral	5.25736
2.3394	TCGA-DD-A39V	1	643.0	FALSE	TCGA-DD-A39V		Non-viral	7.939439999999999
2.3394	TCGA-DD-A39V	1	643.0	FALSE	TCGA-DD-A39V		Non-viral	5.25736
3.7628	TCGA-DD-AAE7	0	644.0	TRUE	TCGA-DD-AAE7		Non-viral	5.93328
0.7949	TCGA-CC-A7IF	1	649.0	FALSE	TCGA-CC-A7IF	Hepatitis C Antibody|Hepatitis B Surface Antigen	Viral	3.1242399999999995
3.4928	TCGA-G3-A25Z	0	655.0	TRUE	TCGA-G3-A25Z		Non-viral	4.32544
4.6481	TCGA-DD-AAD2	0	658.0	TRUE	TCGA-DD-AAD2		Non-viral	5.926559999999999
0.6606	TCGA-DD-A4NE	1	660.0	FALSE	TCGA-DD-A4NE	Hepatitis C Virus R|Hepatitis B Surface Antigen|HBV Core Antibody	Viral	2.6595
2.6072	TCGA-DD-A11C	0	662.0	FALSE	TCGA-DD-A11C	Hepatitis B Surface Antigen|HBV Surface Antibody|HBV Core Antibody	Viral	4.5418199999999995
2.6072	TCGA-DD-A11C	0	662.0	FALSE	TCGA-DD-A11C	Hepatitis B Surface Antigen|HBV Surface Antibody|HBV Core Antibody	Viral	4.88802
2.6072	TCGA-DD-A11C	0	662.0	FALSE	TCGA-DD-A11C	Hepatitis B Surface Antigen|HBV Surface Antibody|HBV Core Antibody	Viral	4.5418199999999995
2.6072	TCGA-DD-A11C	0	662.0	FALSE	TCGA-DD-A11C	Hepatitis B Surface Antigen|HBV Surface Antibody|HBV Core Antibody	Viral	4.88802
1.1508	TCGA-G3-A6UC	0	671.0	FALSE	TCGA-G3-A6UC	Hepatitis C Antibody|Hepatitis B Surface Antigen|HBV Surface Antibody	Viral	2.50528
1.9001	TCGA-DD-AAD6	0	672.0	FALSE	TCGA-DD-AAD6		Non-viral	3.8337000000000003
3.5529	TCGA-G3-A3CG	0	673.0	TRUE	TCGA-G3-A3CG		Non-viral	4.260540000000001
3.5408	TCGA-BC-A3KG	0	680.0	TRUE	TCGA-BC-A3KG		Non-viral	4.66218
0.8951	TCGA-ES-A2HS	1	688.0	FALSE	TCGA-ES-A2HS		Non-viral	2.97676
0.8951	TCGA-ES-A2HS	1	688.0	FALSE	TCGA-ES-A2HS		Non-viral	2.97676
4.1576	TCGA-XR-A8TF	1	693.0	TRUE	TCGA-XR-A8TF		Non-viral	5.1671
0.0	TCGA-DD-A73D	0	693.0	FALSE	TCGA-DD-A73D	Hepatitis C Virus R|Hepatitis B Surface Antigen	Viral	2.55988
3.2545	TCGA-2Y-A9H9	0	697.0	FALSE	TCGA-2Y-A9H9		Non-viral	4.86794
5.8009	TCGA-G3-A5SJ	0	698.0	TRUE	TCGA-G3-A5SJ		Non-viral	7.32788
1.4765	TCGA-MI-A75G	0	698.0	FALSE	TCGA-MI-A75G	HCV Genotype	Viral	3.6010199999999997
3.1388	TCGA-DD-A73C	0	701.0	FALSE	TCGA-DD-A73C	Hepatitis B Surface Antigen|HBV Surface Antibody|HBV Core Antibody	Viral	4.40054
5.0019	TCGA-ZP-A9CZ	0	706.0	TRUE	TCGA-ZP-A9CZ	Hepatitis B Surface Antigen	Viral	6.64106
4.5529	TCGA-BC-A10Y	1	711.0	TRUE	TCGA-BC-A10Y		Non-viral	5.7321
4.5529	TCGA-BC-A10Y	1	711.0	TRUE	TCGA-BC-A10Y		Non-viral	5.16432
4.5529	TCGA-BC-A10Y	1	711.0	TRUE	TCGA-BC-A10Y		Non-viral	5.7321
4.5529	TCGA-BC-A10Y	1	711.0	TRUE	TCGA-BC-A10Y		Non-viral	5.16432
1.3471	TCGA-DD-AAEG	0	719.0	FALSE	TCGA-DD-AAEG		Non-viral	2.67704
1.7073	TCGA-DD-AAE9	0	722.0	FALSE	TCGA-DD-AAE9		Non-viral	3.3322000000000003
4.3725	TCGA-2Y-A9GS	1	724.0	TRUE	TCGA-2Y-A9GS	HCV Genotype|Hepatitis B Surface Antigen|HBV Core Antibody	Viral	4.88096
3.1256	TCGA-DD-A73A	0	728.0	FALSE	TCGA-DD-A73A	Hepatitis B Surface Antigen|HBV Surface Antibody|HBV Core Antibody	Viral	5.1186
5.0139	TCGA-FV-A2QQ	0	729.0	TRUE	TCGA-FV-A2QQ		Non-viral	5.85004
3.2359	TCGA-G3-A5SK	0	744.0	FALSE	TCGA-G3-A5SK		Non-viral	5.855580000000001
4.1838	TCGA-MI-A75H	0	747.0	TRUE	TCGA-MI-A75H	HCV Genotype	Viral	5.65916
2.2028	TCGA-WX-AA46	0	756.0	FALSE	TCGA-WX-AA46	Hepatitis C Antibody	Viral	4.397959999999999
6.4018	TCGA-2Y-A9GY	1	757.0	TRUE	TCGA-2Y-A9GY		Non-viral	8.54026
3.2502	TCGA-DD-AAED	0	763.0	FALSE	TCGA-DD-AAED		Non-viral	5.5616
3.8177	TCGA-ZP-A9D2	1	765.0	TRUE	TCGA-ZP-A9D2	Hepatitis C Virus R	Viral	5.11908
0.8697	TCGA-G3-A5SI	1	768.0	FALSE	TCGA-G3-A5SI		Non-viral	2.02302
2.694	TCGA-BC-A10X	1	770.0	FALSE	TCGA-BC-A10X		Non-viral	4.43982
2.694	TCGA-BC-A10X	1	770.0	FALSE	TCGA-BC-A10X		Non-viral	5.082879999999999
2.694	TCGA-BC-A10X	1	770.0	FALSE	TCGA-BC-A10X		Non-viral	4.43982
2.694	TCGA-BC-A10X	1	770.0	FALSE	TCGA-BC-A10X		Non-viral	5.082879999999999
5.2899	TCGA-G3-A3CH	0	780.0	TRUE	TCGA-G3-A3CH		Non-viral	6.99404
5.2899	TCGA-G3-A3CH	0	780.0	TRUE	TCGA-G3-A3CH		Non-viral	5.66176
5.2899	TCGA-G3-A3CH	0	780.0	TRUE	TCGA-G3-A3CH		Non-viral	6.99404
5.2899	TCGA-G3-A3CH	0	780.0	TRUE	TCGA-G3-A3CH		Non-viral	5.66176
1.9401	TCGA-ZP-A9CY	0	782.0	FALSE	TCGA-ZP-A9CY		Non-viral	4.1584
5.9421	TCGA-DD-AAEH	0	784.0	TRUE	TCGA-DD-AAEH		Non-viral	7.55536
2.4582	TCGA-NI-A8LF	0	799.0	FALSE	TCGA-NI-A8LF		Non-viral	3.89942
4.2049	TCGA-DD-A4NG	1	802.0	TRUE	TCGA-DD-A4NG	Hepatitis B Surface Antigen|HBV Surface Antibody|HBV Core Antibody	Viral	4.950699999999999
3.2635	TCGA-DD-AAEE	0	810.0	FALSE	TCGA-DD-AAEE		Non-viral	3.9410799999999995
5.2282	TCGA-DD-A4NI	0	816.0	TRUE	TCGA-DD-A4NI	Hepatitis B Surface Antigen|HBV Surface Antibody|HBV Core Antibody	Viral	6.849080000000001
3.6069	TCGA-ED-A4XI	0	819.0	TRUE	TCGA-ED-A4XI	Hepatitis B Surface Antigen	Viral	5.41754
3.3141	TCGA-DD-A39W	1	827.0	FALSE	TCGA-DD-A39W		Non-viral	4.10566
3.3141	TCGA-DD-A39W	1	827.0	FALSE	TCGA-DD-A39W		Non-viral	4.57044
3.3141	TCGA-DD-A39W	1	827.0	FALSE	TCGA-DD-A39W		Non-viral	4.10566
3.3141	TCGA-DD-A39W	1	827.0	FALSE	TCGA-DD-A39W		Non-viral	4.57044
3.6192	TCGA-KR-A7K2	0	829.0	TRUE	TCGA-KR-A7K2	HCV Genotype	Viral	4.79458
1.9349	TCGA-BC-A10T	1	837.0	FALSE	TCGA-BC-A10T		Non-viral	5.064159999999999
1.9349	TCGA-BC-A10T	1	837.0	FALSE	TCGA-BC-A10T		Non-viral	4.1718
1.9349	TCGA-BC-A10T	1	837.0	FALSE	TCGA-BC-A10T		Non-viral	5.064159999999999
1.9349	TCGA-BC-A10T	1	837.0	FALSE	TCGA-BC-A10T		Non-viral	4.1718
1.5154	TCGA-BC-A10U	1	837.0	FALSE	TCGA-BC-A10U		Non-viral	4.02548
1.5154	TCGA-BC-A10U	1	837.0	FALSE	TCGA-BC-A10U		Non-viral	5.2367
1.5154	TCGA-BC-A10U	1	837.0	FALSE	TCGA-BC-A10U		Non-viral	4.02548
1.5154	TCGA-BC-A10U	1	837.0	FALSE	TCGA-BC-A10U		Non-viral	5.2367
0.0	TCGA-FV-A3I0	0	848.0	FALSE	TCGA-FV-A3I0		Non-viral	6.40778
0.0	TCGA-FV-A3I0	0	848.0	FALSE	TCGA-FV-A3I0		Non-viral	4.09336
0.0	TCGA-FV-A3I0	0	848.0	FALSE	TCGA-FV-A3I0		Non-viral	6.40778
0.0	TCGA-FV-A3I0	0	848.0	FALSE	TCGA-FV-A3I0		Non-viral	4.09336
2.9811	TCGA-UB-A7MA	0	848.0	FALSE	TCGA-UB-A7MA	Hepatitis C Antibody|Hepatitis B Surface Antigen|HBV Core Antibody	Viral	4.44484
1.242	TCGA-2Y-A9GZ	1	848.0	FALSE	TCGA-2Y-A9GZ	Hepatitis C Antibody|HBV Core Antibody	Viral	3.47278
6.6994	TCGA-BC-4073	0	849.0	TRUE	TCGA-BC-4073		Non-viral	8.11768
8.3432	TCGA-ED-A5KG	0	854.0	TRUE	TCGA-ED-A5KG	Hepatitis B Surface Antigen	Viral	9.012519999999999
4.6606	TCGA-G3-A25V	0	860.0	TRUE	TCGA-G3-A25V		Non-viral	5.6864799999999995
6.158	TCGA-GJ-A3OU	0	879.0	TRUE	TCGA-GJ-A3OU	Hepatitis C Antibody	Viral	7.20714
5.9351	TCGA-DD-AADN	0	898.0	TRUE	TCGA-DD-AADN		Non-viral	8.7987
4.2709	TCGA-XR-A8TG	0	898.0	TRUE	TCGA-XR-A8TG		Non-viral	4.53502
0.575	TCGA-DD-A4NN	1	899.0	FALSE	TCGA-DD-A4NN		Non-viral	4.10482
6.3409	TCGA-KR-A7K8	0	906.0	TRUE	TCGA-KR-A7K8		Non-viral	8.29268
2.1435	TCGA-ED-A459	0	910.0	FALSE	TCGA-ED-A459	Hepatitis B Surface Antigen	Viral	3.97904
2.9	TCGA-DD-A4NH	0	917.0	FALSE	TCGA-DD-A4NH	Hepatitis B Surface Antigen	Viral	5.129600000000001
4.1251	TCGA-XR-A8TE	0	925.0	TRUE	TCGA-XR-A8TE		Non-viral	4.07716
4.5855	TCGA-DD-A4NJ	0	928.0	TRUE	TCGA-DD-A4NJ	Hepatitis B Surface Antigen|HBV Surface Antibody|HBV Core Antibody	Viral	5.125719999999999
4.0127	TCGA-DD-A3A9	1	931.0	TRUE	TCGA-DD-A3A9		Non-viral	5.053800000000001
0.0	TCGA-DD-A4NF	0	942.0	FALSE	TCGA-DD-A4NF	Hepatitis C Virus R|HCV Genotype|Hepatitis B Surface Antigen|HBV Surface Antibody|HBV Core Antibody	Viral	2.27442
4.8078	TCGA-KR-A7K7	0	951.0	TRUE	TCGA-KR-A7K7		Non-viral	7.7878
3.6364	TCGA-DD-A4NB	0	989.0	TRUE	TCGA-DD-A4NB		Non-viral	5.7506
2.1329	TCGA-DD-A1EJ	1	1005.0	FALSE	TCGA-DD-A1EJ	Hepatitis B Surface Antigen|HBV Surface Antibody|HBV Core Antibody	Viral	5.03124
2.1329	TCGA-DD-A1EJ	1	1005.0	FALSE	TCGA-DD-A1EJ	Hepatitis B Surface Antigen|HBV Surface Antibody|HBV Core Antibody	Viral	4.7891200000000005
2.1329	TCGA-DD-A1EJ	1	1005.0	FALSE	TCGA-DD-A1EJ	Hepatitis B Surface Antigen|HBV Surface Antibody|HBV Core Antibody	Viral	5.03124
2.1329	TCGA-DD-A1EJ	1	1005.0	FALSE	TCGA-DD-A1EJ	Hepatitis B Surface Antigen|HBV Surface Antibody|HBV Core Antibody	Viral	4.7891200000000005
3.6512	TCGA-DD-A4NA	0	1008.0	TRUE	TCGA-DD-A4NA	Hepatitis B Surface Antigen|HBV Surface Antibody	Viral	5.254759999999999
5.8858	TCGA-XR-A8TD	0	1030.0	TRUE	TCGA-XR-A8TD		Non-viral	8.413419999999999
4.5251	TCGA-DD-AADK	0	1049.0	TRUE	TCGA-DD-AADK		Non-viral	5.607940000000001
2.4108	TCGA-DD-AADJ	0	1066.0	FALSE	TCGA-DD-AADJ		Non-viral	4.591
5.8539	TCGA-DD-AAEK	0	1067.0	TRUE	TCGA-DD-AAEK		Non-viral	7.067359999999999
4.3124	TCGA-DD-AADI	0	1085.0	TRUE	TCGA-DD-AADI		Non-viral	5.89854
5.4633	TCGA-DD-A73F	0	1085.0	TRUE	TCGA-DD-A73F		Non-viral	7.47566
3.3783	TCGA-ZP-A9CV	1	1088.0	TRUE	TCGA-ZP-A9CV		Non-viral	5.01388
3.0141	TCGA-ZP-A9D0	0	1091.0	FALSE	TCGA-ZP-A9D0		Non-viral	3.9137
6.2934	TCGA-RG-A7D4	0	1098.0	TRUE	TCGA-RG-A7D4	Hepatitis C Antibody	Viral	8.4567
3.5985	TCGA-BD-A3ER	0	1115.0	TRUE	TCGA-BD-A3ER	Hepatitis B Surface Antigen|HBV Surface Antibody|HBV Core Antibody	Viral	5.03648
0.9886	TCGA-BC-A10Q	1	1135.0	FALSE	TCGA-BC-A10Q		Non-viral	4.53232
0.9886	TCGA-BC-A10Q	1	1135.0	FALSE	TCGA-BC-A10Q		Non-viral	4.7827
0.9886	TCGA-BC-A10Q	1	1135.0	FALSE	TCGA-BC-A10Q		Non-viral	4.53232
0.9886	TCGA-BC-A10Q	1	1135.0	FALSE	TCGA-BC-A10Q		Non-viral	4.7827
1.4972	TCGA-DD-AADG	0	1145.0	FALSE	TCGA-DD-AADG		Non-viral	2.9738599999999997
1.8544	TCGA-HP-A5N0	1	1147.0	FALSE	TCGA-HP-A5N0		Non-viral	3.8568599999999997
6.6564	TCGA-DD-A114	1	1149.0	TRUE	TCGA-DD-A114	Hepatitis C Virus R|HCV Genotype|Hepatitis B Surface Antigen|HBV Surface Antibody|HBV Core Antibody	Viral	7.12606
6.6564	TCGA-DD-A114	1	1149.0	TRUE	TCGA-DD-A114	Hepatitis C Virus R|HCV Genotype|Hepatitis B Surface Antigen|HBV Surface Antibody|HBV Core Antibody	Viral	7.6238
6.6564	TCGA-DD-A114	1	1149.0	TRUE	TCGA-DD-A114	Hepatitis C Virus R|HCV Genotype|Hepatitis B Surface Antigen|HBV Surface Antibody|HBV Core Antibody	Viral	7.12606
6.6564	TCGA-DD-A114	1	1149.0	TRUE	TCGA-DD-A114	Hepatitis C Virus R|HCV Genotype|Hepatitis B Surface Antigen|HBV Surface Antibody|HBV Core Antibody	Viral	7.6238
3.2595	TCGA-2Y-A9H7	0	1168.0	FALSE	TCGA-2Y-A9H7	Hepatitis C Antibody|Hepatitis B Surface Antigen|HBV Surface Antibody|HBV Core Antibody	Viral	3.9416200000000003
1.2827	TCGA-DD-A4NK	1	1210.0	FALSE	TCGA-DD-A4NK	Hepatitis B Surface Antigen	Viral	3.2014399999999994
2.927	TCGA-DD-AAD8	0	1219.0	FALSE	TCGA-DD-AAD8		Non-viral	4.90154
5.49	TCGA-2Y-A9H1	1	1229.0	TRUE	TCGA-2Y-A9H1	Hepatitis C Antibody	Viral	6.332439999999999
3.5867	TCGA-DD-AADD	0	1231.0	TRUE	TCGA-DD-AADD		Non-viral	5.46336
4.7359	TCGA-DD-AADA	0	1233.0	TRUE	TCGA-DD-AADA		Non-viral	5.89164
0.0	TCGA-ZS-A9CE	0	1241.0	FALSE	TCGA-ZS-A9CE	Hepatitis C Antibody|Hepatitis B Surface Antigen	Viral	2.4530000000000003
5.9495	TCGA-DD-AADB	0	1242.0	TRUE	TCGA-DD-AADB		Non-viral	7.8655
4.8754	TCGA-2Y-A9GW	1	1271.0	TRUE	TCGA-2Y-A9GW		Non-viral	5.83682
3.8964	TCGA-DD-AAD3	0	1295.0	TRUE	TCGA-DD-AAD3		Non-viral	5.11132
4.3213	TCGA-DD-AACN	0	1302.0	TRUE	TCGA-DD-AACN		Non-viral	5.59918
2.9098	TCGA-XR-A8TC	0	1339.0	FALSE	TCGA-XR-A8TC		Non-viral	3.68938
1.603	TCGA-DD-AAD5	0	1345.0	FALSE	TCGA-DD-AAD5		Non-viral	4.5039
5.6558	TCGA-BC-A216	0	1351.0	TRUE	TCGA-BC-A216		Non-viral	8.3138
5.6558	TCGA-BC-A216	0	1351.0	TRUE	TCGA-BC-A216		Non-viral	5.64196
5.6558	TCGA-BC-A216	0	1351.0	TRUE	TCGA-BC-A216		Non-viral	8.3138
5.6558	TCGA-BC-A216	0	1351.0	TRUE	TCGA-BC-A216		Non-viral	5.64196
3.3482	TCGA-BD-A2L6	0	1363.0	FALSE	TCGA-BD-A2L6	Hepatitis B Surface Antigen|HBV Surface Antibody|HBV Core Antibody	Viral	7.522320000000001
3.3482	TCGA-BD-A2L6	0	1363.0	FALSE	TCGA-BD-A2L6	Hepatitis B Surface Antigen|HBV Surface Antibody|HBV Core Antibody	Viral	4.3071
3.3482	TCGA-BD-A2L6	0	1363.0	FALSE	TCGA-BD-A2L6	Hepatitis B Surface Antigen|HBV Surface Antibody|HBV Core Antibody	Viral	7.522320000000001
3.3482	TCGA-BD-A2L6	0	1363.0	FALSE	TCGA-BD-A2L6	Hepatitis B Surface Antigen|HBV Surface Antibody|HBV Core Antibody	Viral	4.3071
4.967	TCGA-DD-A1EG	1	1372.0	TRUE	TCGA-DD-A1EG	Hepatitis B Surface Antigen	Viral	6.28324
4.967	TCGA-DD-A1EG	1	1372.0	TRUE	TCGA-DD-A1EG	Hepatitis B Surface Antigen	Viral	6.4020399999999995
4.967	TCGA-DD-A1EG	1	1372.0	TRUE	TCGA-DD-A1EG	Hepatitis B Surface Antigen	Viral	6.28324
4.967	TCGA-DD-A1EG	1	1372.0	TRUE	TCGA-DD-A1EG	Hepatitis B Surface Antigen	Viral	6.4020399999999995
3.5259	TCGA-ZS-A9CD	1	1386.0	TRUE	TCGA-ZS-A9CD	Hepatitis C Antibody|Hepatitis B Surface Antigen	Viral	4.119120000000001
4.642	TCGA-BC-A217	1	1397.0	TRUE	TCGA-BC-A217		Non-viral	5.77496
3.3372	TCGA-BC-A10S	1	1423.0	FALSE	TCGA-BC-A10S		Non-viral	5.23512
3.3372	TCGA-BC-A10S	1	1423.0	FALSE	TCGA-BC-A10S		Non-viral	5.23512
2.9989	TCGA-DD-AACW	0	1424.0	FALSE	TCGA-DD-AACW		Non-viral	5.02154
2.9149	TCGA-DD-AACY	0	1450.0	FALSE	TCGA-DD-AACY		Non-viral	4.03506
2.536	TCGA-2Y-A9H4	0	1452.0	FALSE	TCGA-2Y-A9H4	Hepatitis C Antibody|Hepatitis B Surface Antigen|HBV Surface Antibody|HBV Core Antibody	Viral	4.89504
7.0161	TCGA-BC-4072	1	1490.0	TRUE	TCGA-BC-4072		Non-viral	7.8914599999999995
3.4253	TCGA-DD-A1EH	0	1495.0	TRUE	TCGA-DD-A1EH	Hepatitis B Surface Antigen|HBV Surface Antibody|HBV Core Antibody|HBV D	Viral	4.02754
3.4253	TCGA-DD-A1EH	0	1495.0	TRUE	TCGA-DD-A1EH	Hepatitis B Surface Antigen|HBV Surface Antibody|HBV Core Antibody|HBV D	Viral	5.50238
3.4253	TCGA-DD-A1EH	0	1495.0	TRUE	TCGA-DD-A1EH	Hepatitis B Surface Antigen|HBV Surface Antibody|HBV Core Antibody|HBV D	Viral	4.02754
3.4253	TCGA-DD-A1EH	0	1495.0	TRUE	TCGA-DD-A1EH	Hepatitis B Surface Antigen|HBV Surface Antibody|HBV Core Antibody|HBV D	Viral	5.50238
6.0874	TCGA-2Y-A9H3	0	1516.0	TRUE	TCGA-2Y-A9H3	Hepatitis C Antibody|Hepatitis B Surface Antigen|HBV Surface Antibody|HBV Core Antibody	Viral	7.4652
1.3757	TCGA-DD-AACV	0	1531.0	FALSE	TCGA-DD-AACV		Non-viral	3.14198
3.5278	TCGA-DD-AAEI	0	1531.0	TRUE	TCGA-DD-AAEI		Non-viral	5.11536
0.901	TCGA-G3-A25T	0	1553.0	FALSE	TCGA-G3-A25T		Non-viral	4.602320000000001
5.3323	TCGA-DD-A11D	1	1560.0	TRUE	TCGA-DD-A11D		Non-viral	6.776619999999999
5.3323	TCGA-DD-A11D	1	1560.0	TRUE	TCGA-DD-A11D		Non-viral	3.16314
5.3323	TCGA-DD-A11D	1	1560.0	TRUE	TCGA-DD-A11D		Non-viral	6.776619999999999
5.3323	TCGA-DD-A11D	1	1560.0	TRUE	TCGA-DD-A11D		Non-viral	3.16314
3.3118	TCGA-DD-AACT	0	1562.0	FALSE	TCGA-DD-AACT		Non-viral	5.40766
2.7578	TCGA-DD-AACU	0	1567.0	FALSE	TCGA-DD-AACU		Non-viral	4.779459999999999
6.2725	TCGA-DD-AACI	0	1618.0	TRUE	TCGA-DD-AACI		Non-viral	8.202639999999999
4.1061	TCGA-DD-A116	1	1622.0	TRUE	TCGA-DD-A116	Hepatitis B Surface Antigen|HBV Surface Antibody|HBV Core Antibody	Viral	5.86492
4.1061	TCGA-DD-A116	1	1622.0	TRUE	TCGA-DD-A116	Hepatitis B Surface Antigen|HBV Surface Antibody|HBV Core Antibody	Viral	4.8822600000000005
4.1061	TCGA-DD-A116	1	1622.0	TRUE	TCGA-DD-A116	Hepatitis B Surface Antigen|HBV Surface Antibody|HBV Core Antibody	Viral	5.86492
4.1061	TCGA-DD-A116	1	1622.0	TRUE	TCGA-DD-A116	Hepatitis B Surface Antigen|HBV Surface Antibody|HBV Core Antibody	Viral	4.8822600000000005
7.1105	TCGA-2Y-A9GT	1	1624.0	TRUE	TCGA-2Y-A9GT	Hepatitis C Virus R|Hepatitis B Surface Antigen|HBV Core Antibody|HBV D	Viral	7.9482
1.419	TCGA-DD-AAW3	0	1633.0	FALSE	TCGA-DD-AAW3		Non-viral	2.60704
0.6558	TCGA-G3-A25U	0	1636.0	FALSE	TCGA-G3-A25U		Non-viral	3.54352
7.2415	TCGA-DD-AACC	1	1685.0	TRUE	TCGA-DD-AACC		Non-viral	9.4515
2.9423	TCGA-DD-A39X	1	1694.0	FALSE	TCGA-DD-A39X	Hepatitis B Surface Antigen|HBV Surface Antibody	Viral	4.966880000000001
2.9423	TCGA-DD-A39X	1	1694.0	FALSE	TCGA-DD-A39X	Hepatitis B Surface Antigen|HBV Surface Antibody	Viral	4.47644
2.9423	TCGA-DD-A39X	1	1694.0	FALSE	TCGA-DD-A39X	Hepatitis B Surface Antigen|HBV Surface Antibody	Viral	4.966880000000001
2.9423	TCGA-DD-A39X	1	1694.0	FALSE	TCGA-DD-A39X	Hepatitis B Surface Antigen|HBV Surface Antibody	Viral	4.47644
2.6093	TCGA-DD-A4NL	0	1711.0	FALSE	TCGA-DD-A4NL	Hepatitis B Surface Antigen|HBV Surface Antibody|HBV Core Antibody	Viral	4.566039999999999
2.4821	TCGA-DD-AAVX	0	1718.0	FALSE	TCGA-DD-AAVX		Non-viral	4.389659999999999
3.6565	TCGA-2Y-A9H2	0	1731.0	TRUE	TCGA-2Y-A9H2	Hepatitis C Antibody|Hepatitis B Surface Antigen|HBV Core Antibody	Viral	5.8075600000000005
5.1903	TCGA-G3-A25X	0	1779.0	TRUE	TCGA-G3-A25X		Non-viral	7.63356
5.1903	TCGA-G3-A25X	0	1779.0	TRUE	TCGA-G3-A25X		Non-viral	7.63356
0.4621	TCGA-NI-A4U2	1	1791.0	FALSE	TCGA-NI-A4U2		Non-viral	4.1706
0.0	TCGA-DD-AACS	0	1804.0	FALSE	TCGA-DD-AACS		Non-viral	2.8419800000000004
3.0764	TCGA-DD-AAVS	0	1823.0	FALSE	TCGA-DD-AAVS		Non-viral	4.84314
6.3758	TCGA-FV-A23B	1	1852.0	TRUE	TCGA-FV-A23B		Non-viral	5.37118
6.3758	TCGA-FV-A23B	1	1852.0	TRUE	TCGA-FV-A23B		Non-viral	6.6928
6.3758	TCGA-FV-A23B	1	1852.0	TRUE	TCGA-FV-A23B		Non-viral	5.37118
6.3758	TCGA-FV-A23B	1	1852.0	TRUE	TCGA-FV-A23B		Non-viral	6.6928
0.0	TCGA-DD-AAW2	0	1855.0	FALSE	TCGA-DD-AAW2		Non-viral	2.63596
4.4553	TCGA-DD-AACO	0	1876.0	TRUE	TCGA-DD-AACO		Non-viral	5.0487400000000004
2.5322	TCGA-DD-AAVZ	0	1900.0	FALSE	TCGA-DD-AAVZ		Non-viral	4.04822
3.4607	TCGA-2Y-A9GU	0	1939.0	TRUE	TCGA-2Y-A9GU	Hepatitis C Antibody|Hepatitis B Surface Antigen|HBV Core Antibody	Viral	4.9410799999999995
2.0218	TCGA-DD-AAVY	0	1970.0	FALSE	TCGA-DD-AAVY		Non-viral	3.55824
0.6776	TCGA-DD-AAW1	0	1989.0	FALSE	TCGA-DD-AAW1		Non-viral	2.9063600000000003
3.8146	TCGA-DD-AAW0	0	2015.0	TRUE	TCGA-DD-AAW0		Non-viral	5.5186
2.9728	TCGA-DD-A1EB	0	2017.0	FALSE	TCGA-DD-A1EB	Hepatitis B Surface Antigen|HBV Surface Antibody|HBV Core Antibody	Viral	5.3923000000000005
2.9728	TCGA-DD-A1EB	0	2017.0	FALSE	TCGA-DD-A1EB	Hepatitis B Surface Antigen|HBV Surface Antibody|HBV Core Antibody	Viral	4.79856
2.9728	TCGA-DD-A1EB	0	2017.0	FALSE	TCGA-DD-A1EB	Hepatitis B Surface Antigen|HBV Surface Antibody|HBV Core Antibody	Viral	5.3923000000000005
2.9728	TCGA-DD-A1EB	0	2017.0	FALSE	TCGA-DD-A1EB	Hepatitis B Surface Antigen|HBV Surface Antibody|HBV Core Antibody	Viral	4.79856
2.8007	TCGA-DD-AADR	0	2028.0	FALSE	TCGA-DD-AADR		Non-viral	4.56476
1.5265	TCGA-DD-AACJ	0	2102.0	FALSE	TCGA-DD-AACJ		Non-viral	3.10524
2.9502	TCGA-BC-A110	1	2116.0	FALSE	TCGA-BC-A110		Non-viral	5.97714
2.9502	TCGA-BC-A110	1	2116.0	FALSE	TCGA-BC-A110		Non-viral	5.4362200000000005
2.9502	TCGA-BC-A110	1	2116.0	FALSE	TCGA-BC-A110		Non-viral	5.97714
2.9502	TCGA-BC-A110	1	2116.0	FALSE	TCGA-BC-A110		Non-viral	5.4362200000000005
1.3516	TCGA-DD-A3A2	1	2131.0	FALSE	TCGA-DD-A3A2		Non-viral	4.91306
1.3516	TCGA-DD-A3A2	1	2131.0	FALSE	TCGA-DD-A3A2		Non-viral	3.7531400000000006
1.3516	TCGA-DD-A3A2	1	2131.0	FALSE	TCGA-DD-A3A2		Non-viral	4.91306
1.3516	TCGA-DD-A3A2	1	2131.0	FALSE	TCGA-DD-A3A2		Non-viral	3.7531400000000006
3.0654	TCGA-DD-AACE	0	2184.0	FALSE	TCGA-DD-AACE		Non-viral	4.20698
0.0	TCGA-DD-AAVU	0	2202.0	FALSE	TCGA-DD-AAVU		Non-viral	2.522
1.7795	TCGA-DD-A4NO	0	2245.0	FALSE	TCGA-DD-A4NO	Hepatitis C Virus R|Hepatitis B Surface Antigen|HBV Surface Antibody|HBV Core Antibody	Viral	4.016800000000001
0.0	TCGA-DD-AACA	0	2301.0	FALSE	TCGA-DD-AACA		Non-viral	2.3300799999999997
0.0	TCGA-DD-AACA	0	2301.0	FALSE	TCGA-DD-AACA		Non-viral	4.02316
0.0	TCGA-DD-AACA	0	2301.0	FALSE	TCGA-DD-AACA		Non-viral	2.3300799999999997
0.0	TCGA-DD-AACA	0	2301.0	FALSE	TCGA-DD-AACA		Non-viral	4.02316
4.3205	TCGA-DD-A1ED	0	2301.0	TRUE	TCGA-DD-A1ED	Hepatitis B Surface Antigen|HBV Surface Antibody|HBV Core Antibody	Viral	5.21054
4.3205	TCGA-DD-A1ED	0	2301.0	TRUE	TCGA-DD-A1ED	Hepatitis B Surface Antigen|HBV Surface Antibody|HBV Core Antibody	Viral	5.21054
4.467	TCGA-DD-AAVW	0	2317.0	TRUE	TCGA-DD-AAVW		Non-viral	5.4687
5.0721	TCGA-DD-AACB	0	2324.0	TRUE	TCGA-DD-AACB		Non-viral	7.60684
3.415	TCGA-DD-A4NV	0	2398.0	TRUE	TCGA-DD-A4NV	Hepatitis B Surface Antigen|HBV Surface Antibody|HBV Core Antibody	Viral	4.40862
3.9849	TCGA-ZS-A9CF	0	2412.0	TRUE	TCGA-ZS-A9CF	Hepatitis C Antibody|Hepatitis B Surface Antigen	Viral	4.75682
3.9849	TCGA-ZS-A9CF	0	2412.0	TRUE	TCGA-ZS-A9CF	Hepatitis C Antibody|Hepatitis B Surface Antigen	Viral	4.86404
3.9849	TCGA-ZS-A9CF	0	2412.0	TRUE	TCGA-ZS-A9CF	Hepatitis C Antibody|Hepatitis B Surface Antigen	Viral	4.75682
3.9849	TCGA-ZS-A9CF	0	2412.0	TRUE	TCGA-ZS-A9CF	Hepatitis C Antibody|Hepatitis B Surface Antigen	Viral	4.86404
4.57	TCGA-DD-A1EA	0	2415.0	TRUE	TCGA-DD-A1EA	Hepatitis B Surface Antigen|HBV Surface Antibody|HBV Core Antibody|HBV D	Viral	6.1039
4.6872	TCGA-DD-A113	0	2425.0	TRUE	TCGA-DD-A113	Hepatitis B Surface Antigen|HBV Surface Antibody|HBV Core Antibody	Viral	5.6788
4.6872	TCGA-DD-A113	0	2425.0	TRUE	TCGA-DD-A113	Hepatitis B Surface Antigen|HBV Surface Antibody|HBV Core Antibody	Viral	4.50364
4.6872	TCGA-DD-A113	0	2425.0	TRUE	TCGA-DD-A113	Hepatitis B Surface Antigen|HBV Surface Antibody|HBV Core Antibody	Viral	5.6788
4.6872	TCGA-DD-A113	0	2425.0	TRUE	TCGA-DD-A113	Hepatitis B Surface Antigen|HBV Surface Antibody|HBV Core Antibody	Viral	4.50364
5.5564	TCGA-2Y-A9GX	0	2442.0	TRUE	TCGA-2Y-A9GX	Hepatitis B Surface Antigen|HBV Surface Antibody|HBV Core Antibody	Viral	6.70594
6.0039	TCGA-DD-AAVV	0	2455.0	TRUE	TCGA-DD-AAVV		Non-viral	6.52428
4.7994	TCGA-DD-A4NS	1	2456.0	TRUE	TCGA-DD-A4NS	Hepatitis B Surface Antigen|HBV Surface Antibody|HBV Core Antibody	Viral	6.1042
4.9504	TCGA-FV-A4ZP	1	2486.0	TRUE	TCGA-FV-A4ZP		Non-viral	7.55118
5.265	TCGA-DD-AAVR	0	2513.0	TRUE	TCGA-DD-AAVR		Non-viral	6.54302
3.8616	TCGA-2Y-A9GV	1	2532.0	TRUE	TCGA-2Y-A9GV	Hepatitis C Antibody|Hepatitis B Surface Antigen|HBV Core Antibody	Viral	4.8957999999999995
2.0478	TCGA-DD-A115	1	2542.0	FALSE	TCGA-DD-A115	Hepatitis B Surface Antigen|HBV Surface Antibody|HBV Core Antibody	Viral	4.78348
2.0478	TCGA-DD-A115	1	2542.0	FALSE	TCGA-DD-A115	Hepatitis B Surface Antigen|HBV Surface Antibody|HBV Core Antibody	Viral	4.78348
6.7099	TCGA-DD-AAVQ	0	2728.0	TRUE	TCGA-DD-AAVQ		Non-viral	7.90678
5.5264	TCGA-DD-A4ND	0	2746.0	TRUE	TCGA-DD-A4ND		Non-viral	7.121899999999999
2.096	TCGA-DD-AAVP	0	2752.0	FALSE	TCGA-DD-AAVP		Non-viral	4.4185
0.0	TCGA-DD-A3A5	1	3125.0	FALSE	TCGA-DD-A3A5		Non-viral	3.5007600000000005
0.0	TCGA-DD-A3A5	1	3125.0	FALSE	TCGA-DD-A3A5		Non-viral	3.9603200000000003
0.0	TCGA-DD-A3A5	1	3125.0	FALSE	TCGA-DD-A3A5		Non-viral	3.5007600000000005
0.0	TCGA-DD-A3A5	1	3125.0	FALSE	TCGA-DD-A3A5		Non-viral	3.9603200000000003
0.0	TCGA-DD-A3A6	1	3258.0	FALSE	TCGA-DD-A3A6	Hepatitis B Surface Antigen|HBV Surface Antibody|HBV Core Antibody	Viral	2.8072000000000004
0.0	TCGA-DD-A3A6	1	3258.0	FALSE	TCGA-DD-A3A6	Hepatitis B Surface Antigen|HBV Surface Antibody|HBV Core Antibody	Viral	5.8766
0.0	TCGA-DD-A3A6	1	3258.0	FALSE	TCGA-DD-A3A6	Hepatitis B Surface Antigen|HBV Surface Antibody|HBV Core Antibody	Viral	2.8072000000000004
0.0	TCGA-DD-A3A6	1	3258.0	FALSE	TCGA-DD-A3A6	Hepatitis B Surface Antigen|HBV Surface Antibody|HBV Core Antibody	Viral	5.8766
0.6136	TCGA-DD-A4NP	0	3308.0	FALSE	TCGA-DD-A4NP	Hepatitis B Surface Antigen|HBV Surface Antibody|HBV Core Antibody	Viral	2.53754
1.9882	TCGA-DD-A118	0	3437.0	FALSE	TCGA-DD-A118	Hepatitis B Surface Antigen|HBV Surface Antibody|HBV Core Antibody	Viral	4.9558599999999995
1.9882	TCGA-DD-A118	0	3437.0	FALSE	TCGA-DD-A118	Hepatitis B Surface Antigen|HBV Surface Antibody|HBV Core Antibody	Viral	3.8105800000000003
1.9882	TCGA-DD-A118	0	3437.0	FALSE	TCGA-DD-A118	Hepatitis B Surface Antigen|HBV Surface Antibody|HBV Core Antibody	Viral	4.9558599999999995
1.9882	TCGA-DD-A118	0	3437.0	FALSE	TCGA-DD-A118	Hepatitis B Surface Antigen|HBV Surface Antibody|HBV Core Antibody	Viral	3.8105800000000003
3.3436	TCGA-DD-A73G	0	3478.0	FALSE	TCGA-DD-A73G	Hepatitis B Surface Antigen|HBV Surface Antibody|HBV Core Antibody	Viral	5.66062
5.4443	TCGA-2Y-A9H0	0	3675.0	TRUE	TCGA-2Y-A9H0		Non-viral	7.4448799999999995
