# Supplementary material
Source: Research Square preprint supplement (doi:10.21203/rs.3.rs-9060848/v1)
Supplement: Supplementary file 14 [file a1042af9258581d1844181e9.xlsx]

## Sheet: Table S11
covariate	coef	exp(coef)	se(coef)	coef lower 95%	coef upper 95%	exp(coef) lower 95%	exp(coef) upper 95%	cmp to	z	p	#REF!
ICOS_expression	0.0039425239259045985	1.0039503058968657	0.04205561047941757	-0.07848495796159911	0.0863700058134083	0.924515966431631	1.0902096375908796	0.0	0.09374549271693747	0.9253113314123289	0.11198923659428266
Stage_numeric	0.18228320096247652	1.199953973884917	0.06950663315521169	0.046052703291624	0.318513698633329	1.0471295966791918	1.3750824578052125	0.0	2.6225295729031974	0.008727969275619408	6.840138261596985
Exhaustion_score	-0.016218412351786542	0.9839123979645285	0.05589102587452663	-0.12576281012485502	0.09332598542128193	0.8818239817002125	1.0978195501122368	0.0	-0.2901791852630564	0.7716791592166272	0.3739269515630865
